# Supplementary material for: Heterogeneity of transcription factor binding specificity models within and across cell lines
Source: HighWire-hosted journal article supplement (doi:10.1101/gr.199166.115), 2016-06-16

**Figure S4.** Fraction of overlapped and non-overlapped sequences which fall in the same or different clusters. Dark orange represents the fraction of overlapped sequences falling in the same cluster, whereas light orange represents non-overlapped sequences. Dark purple represents the fraction of overlapped sequences falling in different clusters, with light purple non-overlapped sequences.

# ATF3

■ overlapped same cluster   
 ■ overlapped different cluster   
 ■ nonoverlapped same cluster   
 ■ nonoverlapped different cluster

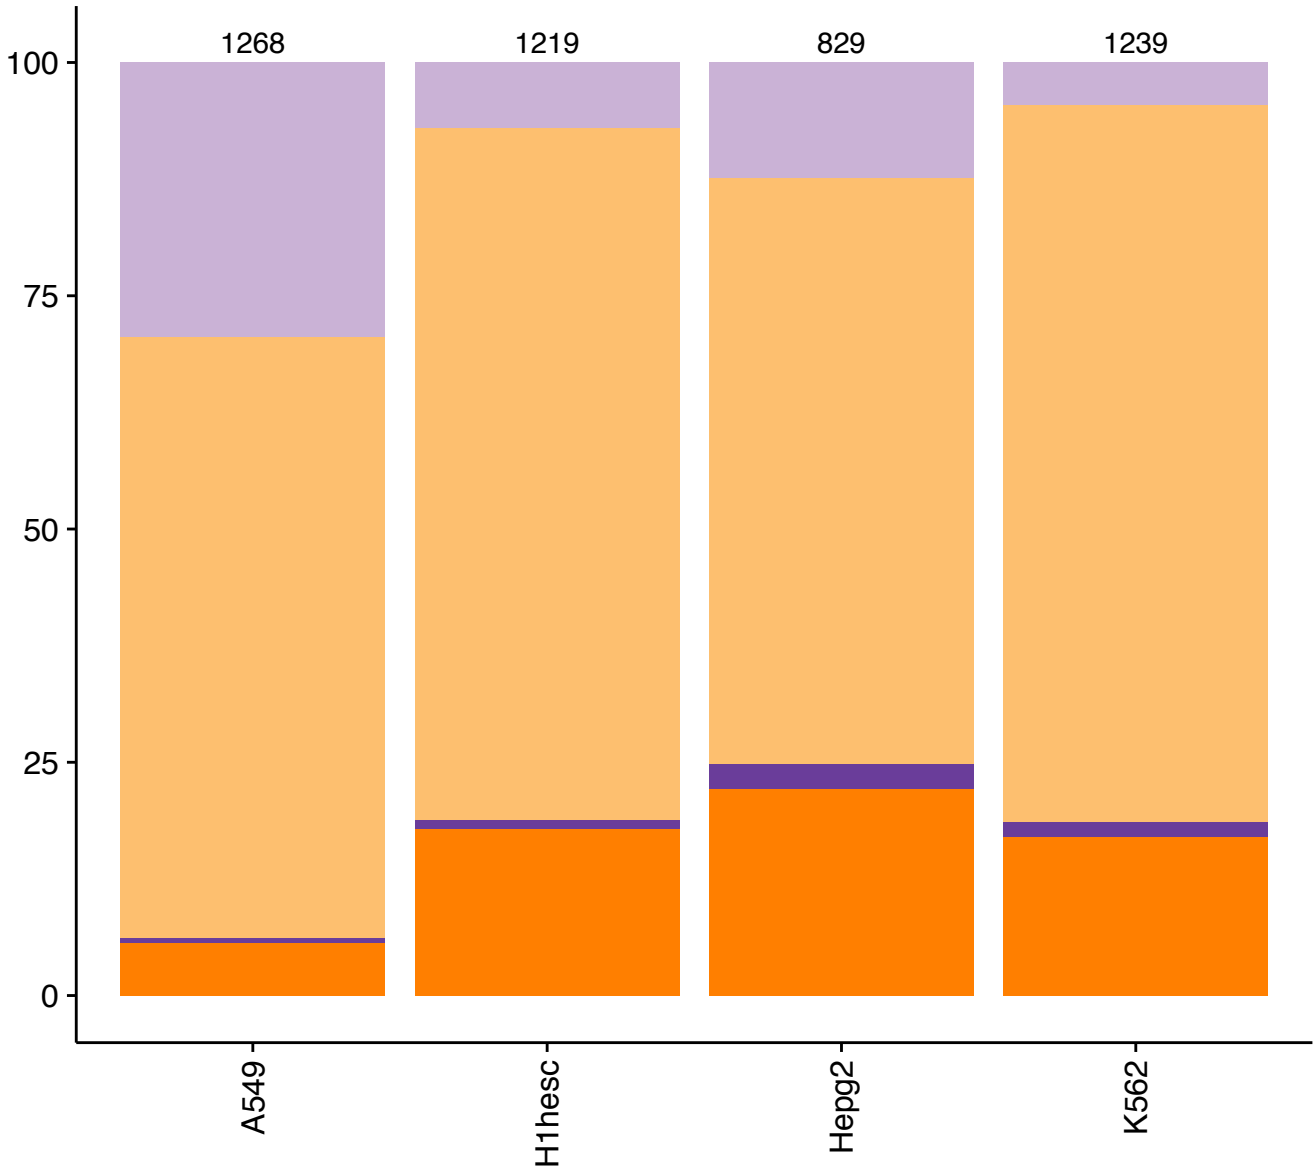

# BHLHE40

overlapped same cluster overlapped different cluster nonoverlapped same cluster nonoverlapped different cluster

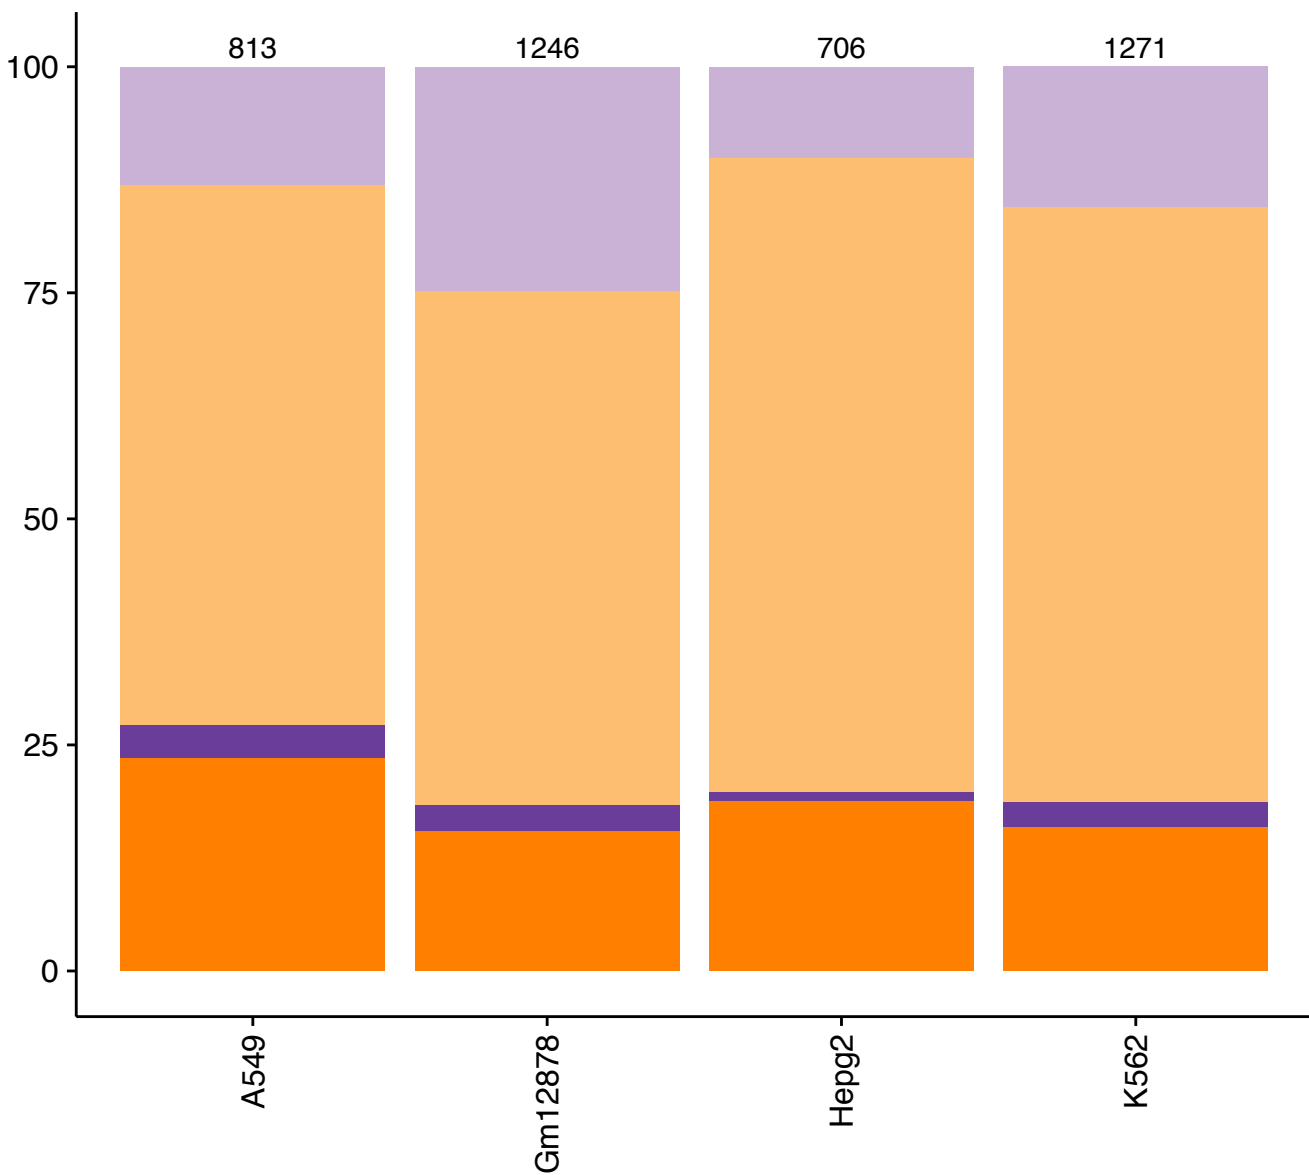

# CEBPB

■ overlapped same cluster   
 ■ overlapped different cluster   
 ■ nonoverlapped same cluster   
 ■ nonoverlapped different cluster

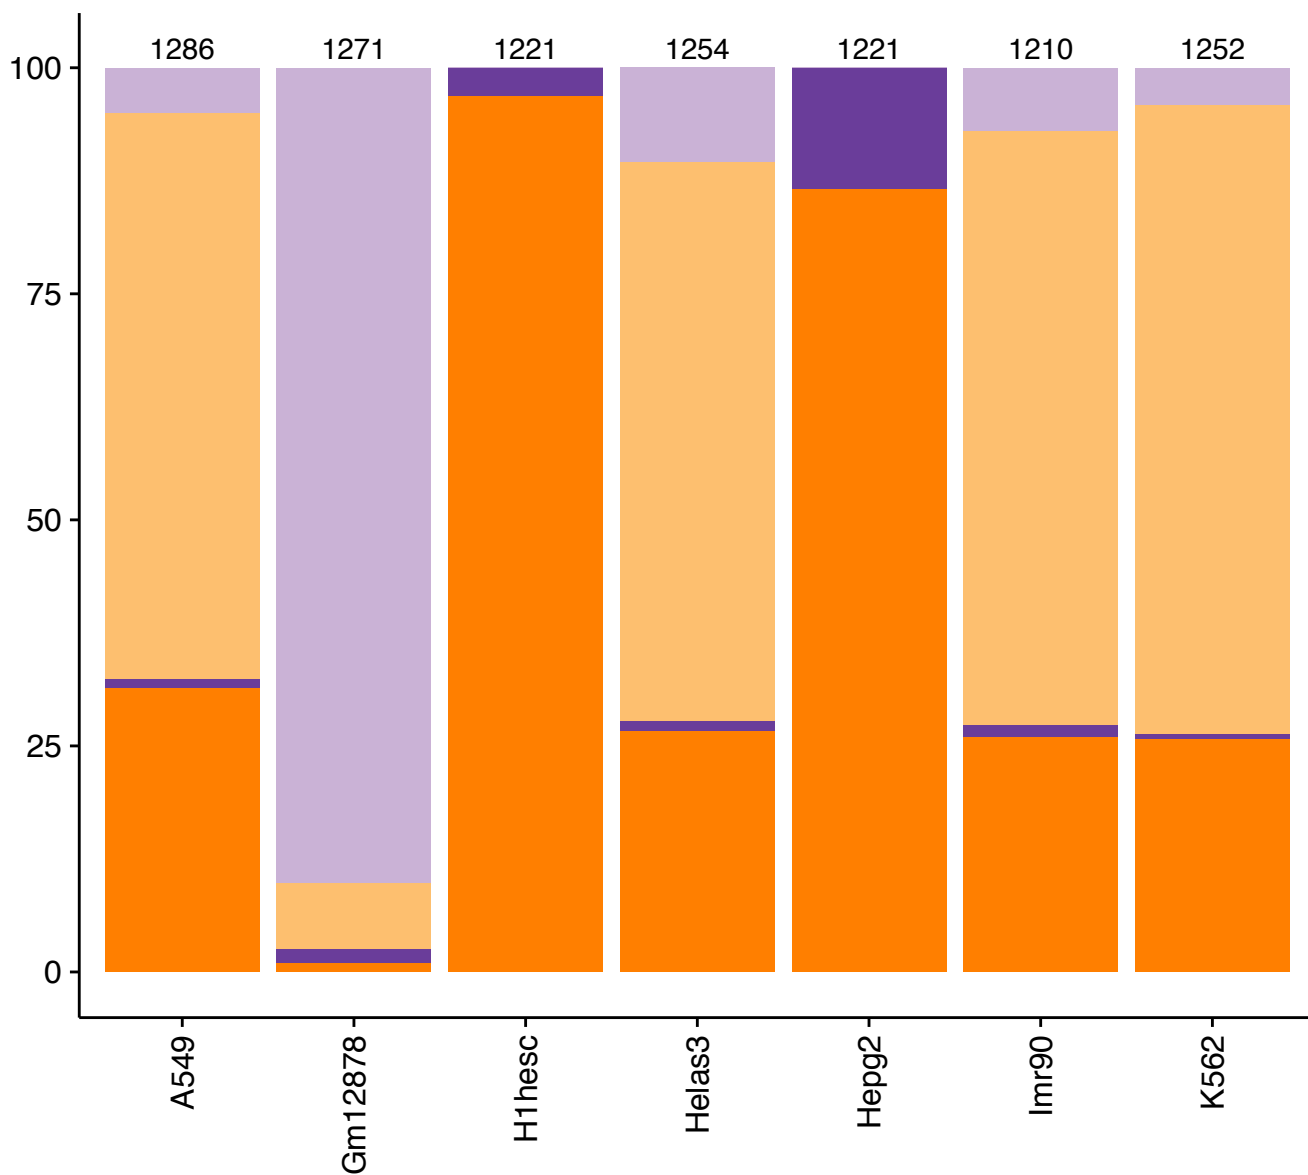

# CTCF

■ overlapped same cluster   
 ■ overlapped different cluster   
 ■ nonoverlapped same cluster   
 ■ nonoverlapped different cluster

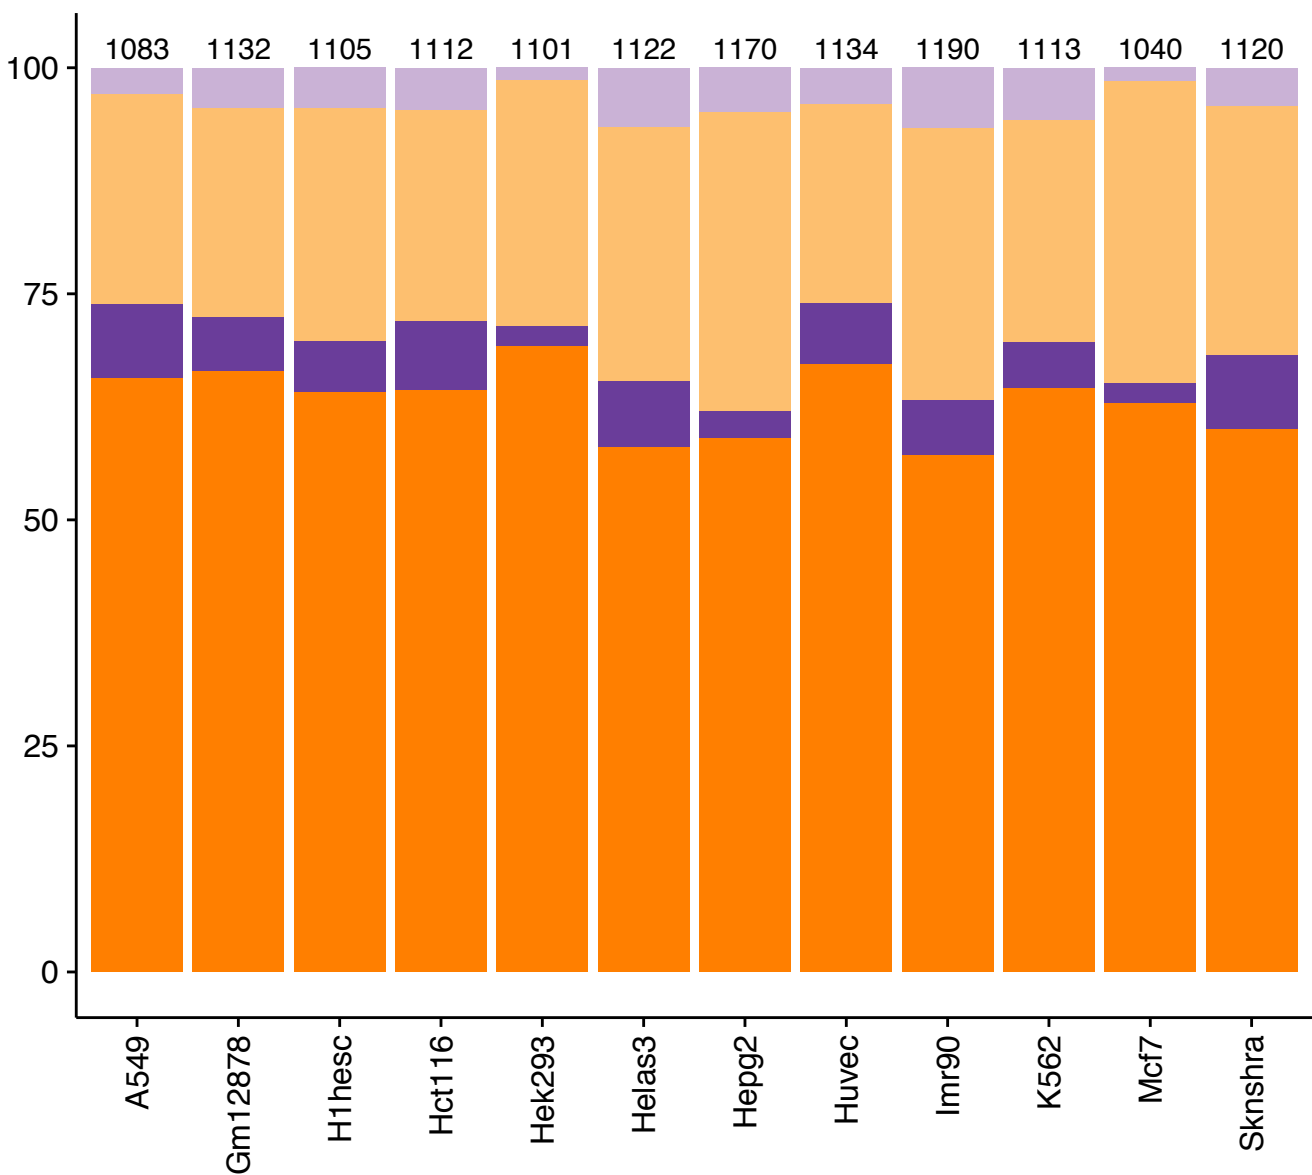

# EP300

■ overlapped same cluster   
 ■ overlapped different cluster   
 ■ nonoverlapped same cluster   
 ■ nonoverlapped different cluster

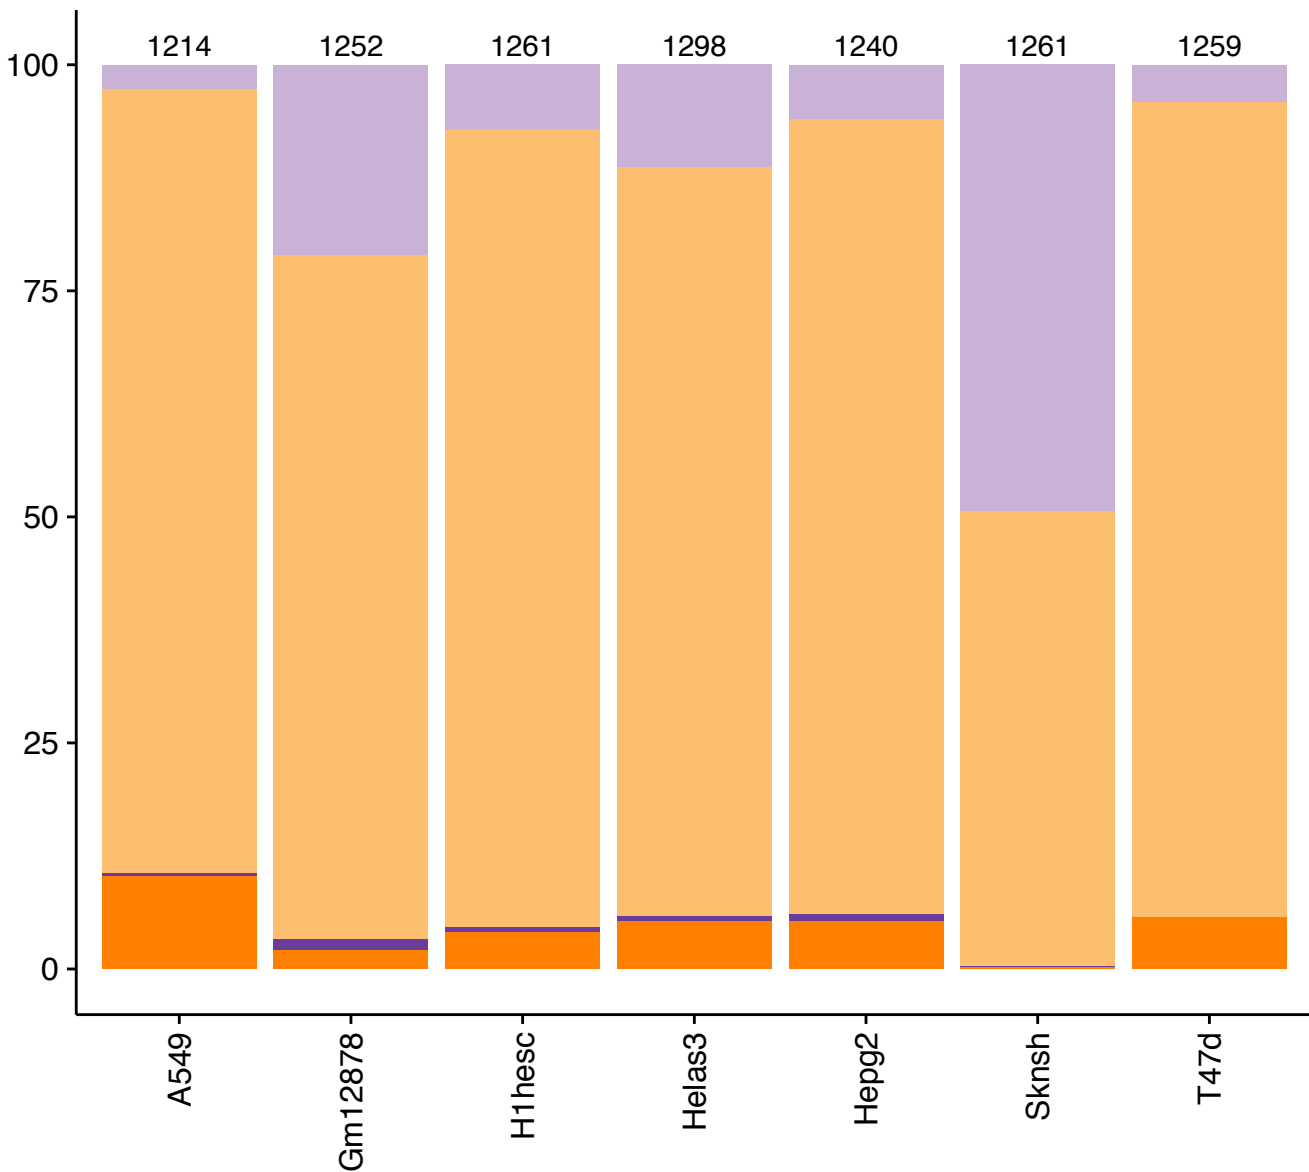

# FOS

■ overlapped same cluster   
 ■ overlapped different cluster   
 ■ nonoverlapped same cluster   
 ■ nonoverlapped different cluster

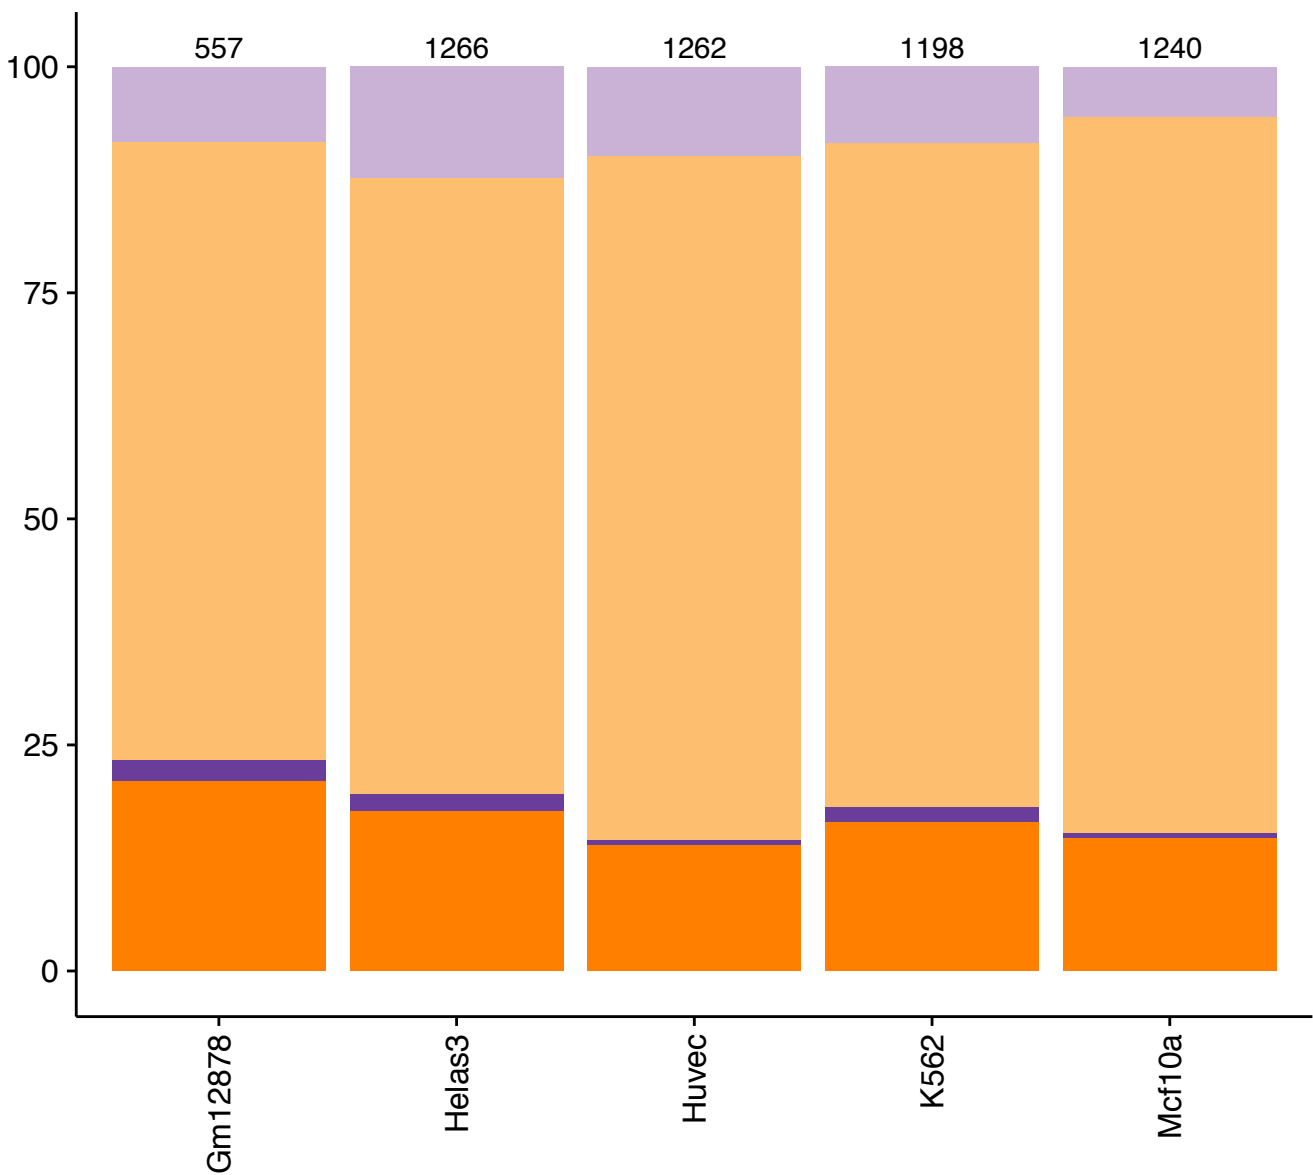

# GABPA

overlapped same cluster overlapped different cluster nonoverlapped same cluster nonoverlapped different cluster

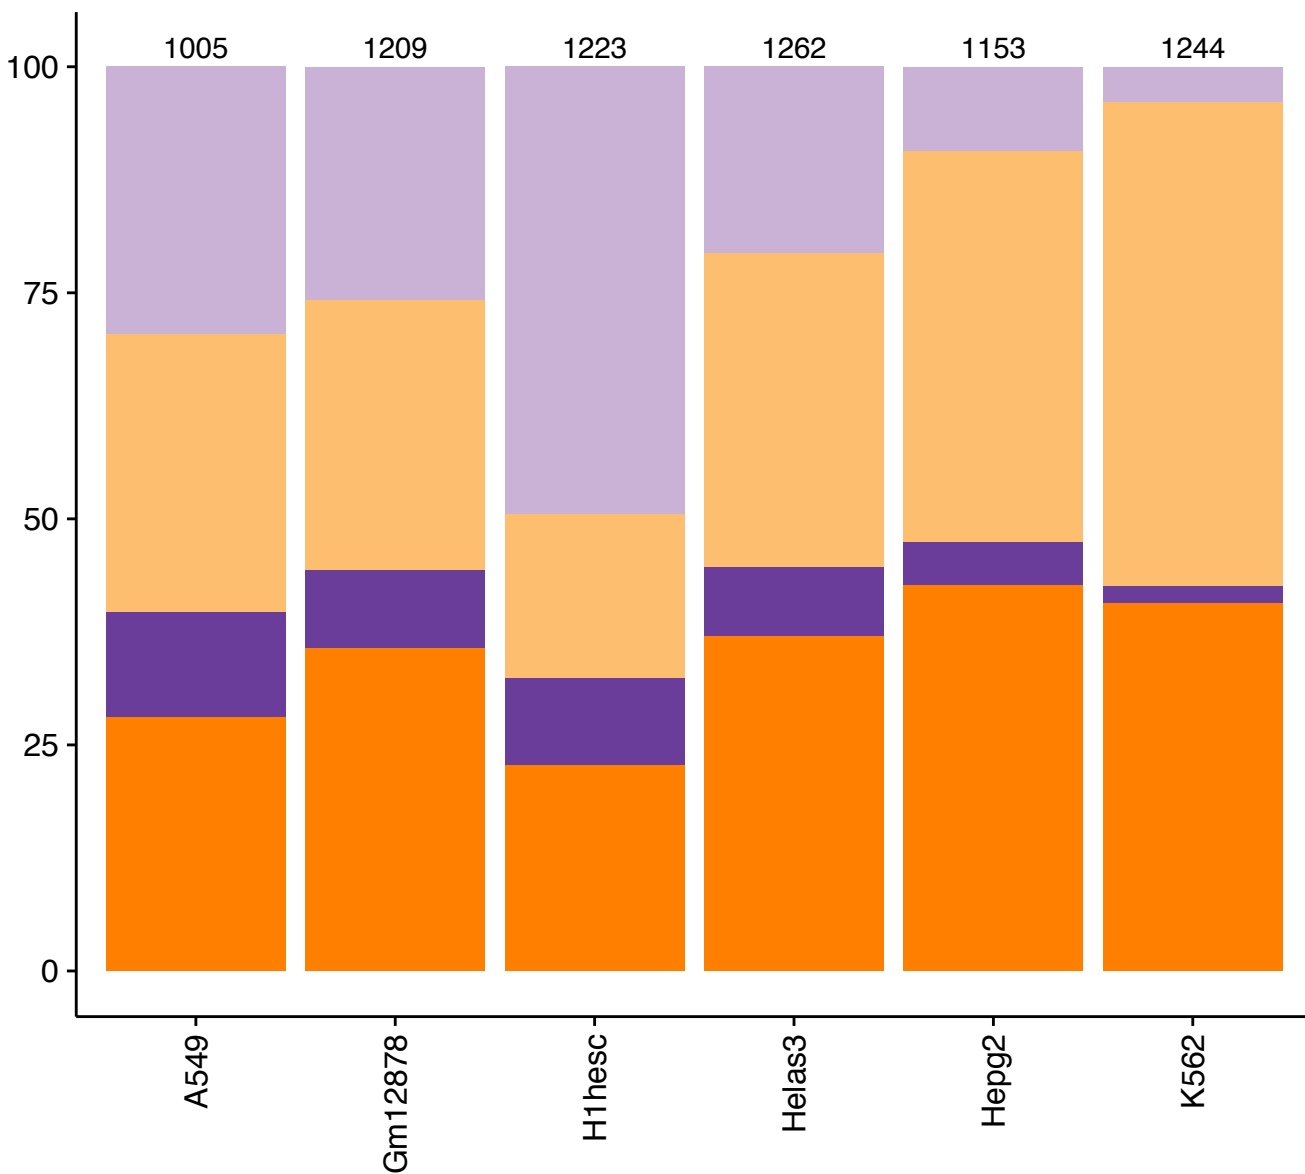



JUN

overlapped same cluster overlapped different cluster nonoverlapped same cluster nonoverlapped different cluster

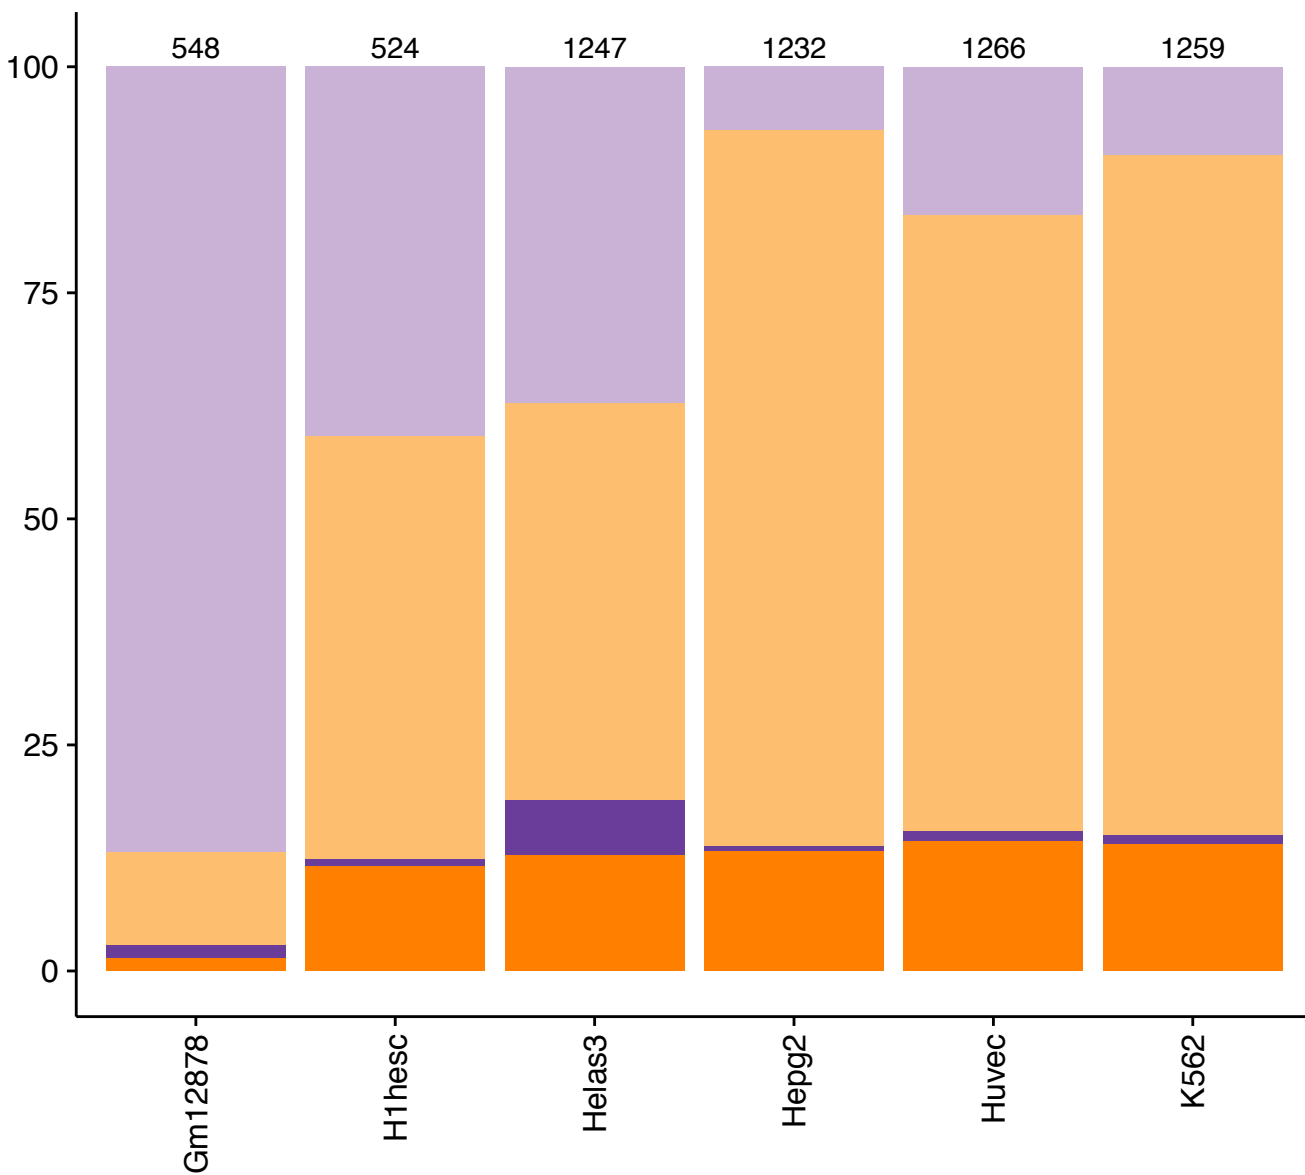

# JUND

■ overlapped same cluster 
 ■ overlapped different cluster 
 ■ nonoverlapped same cluster 
 ■ nonoverlapped different cluster

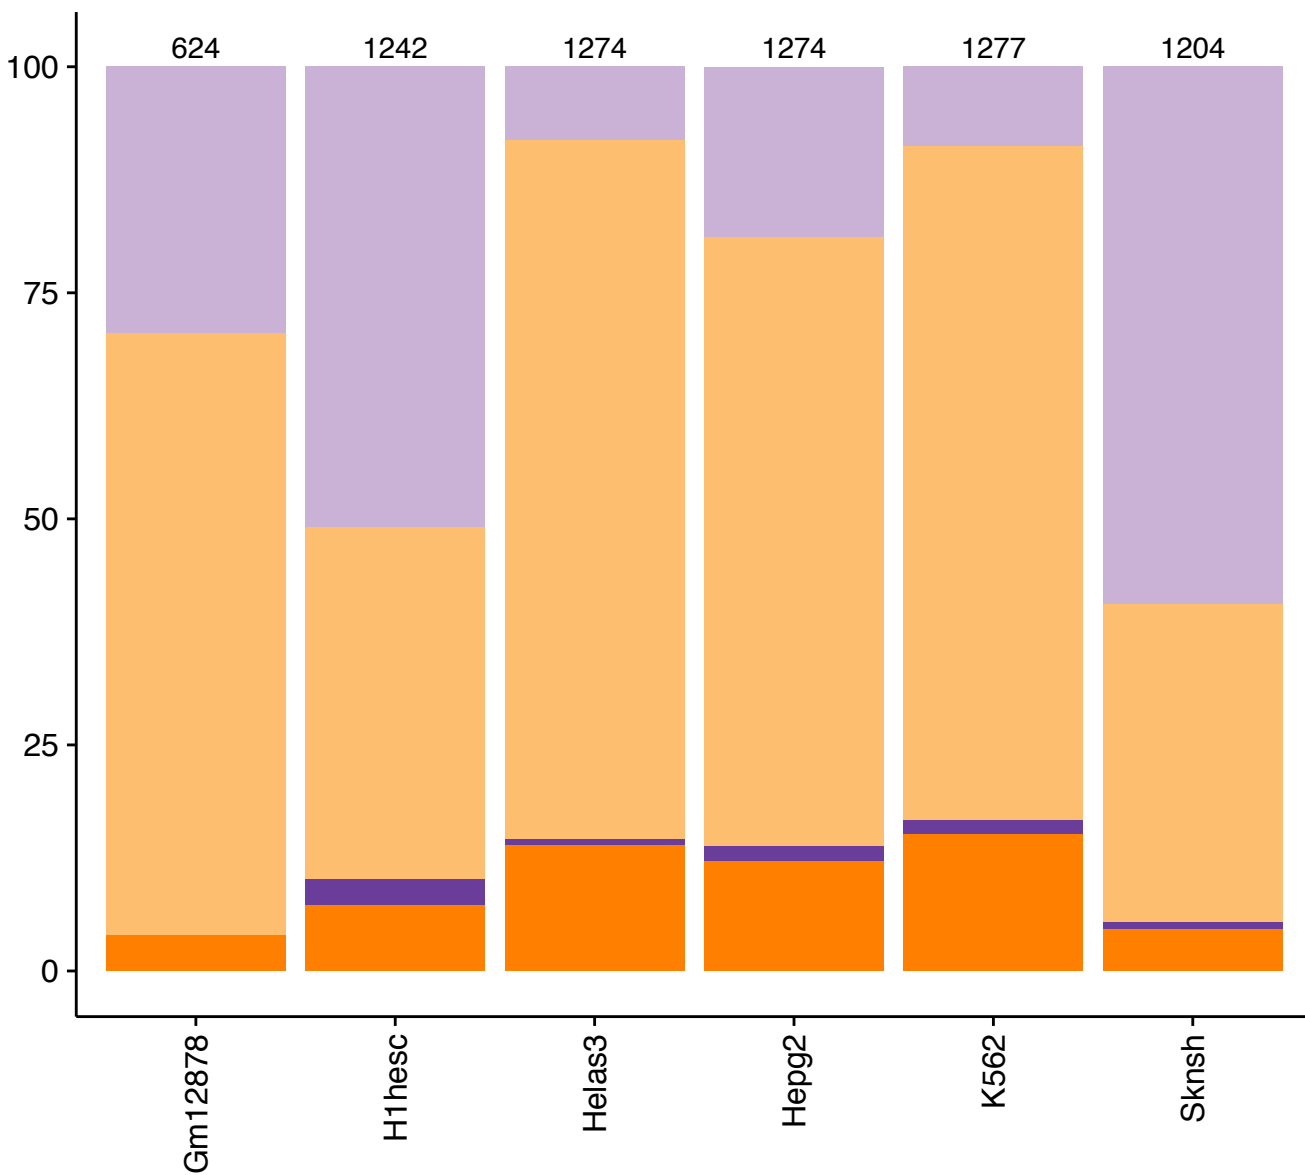

# MAFK

■ overlapped same cluster   
 ■ overlapped different cluster   
 ■ nonoverlapped same cluster   
 ■ nonoverlapped different cluster

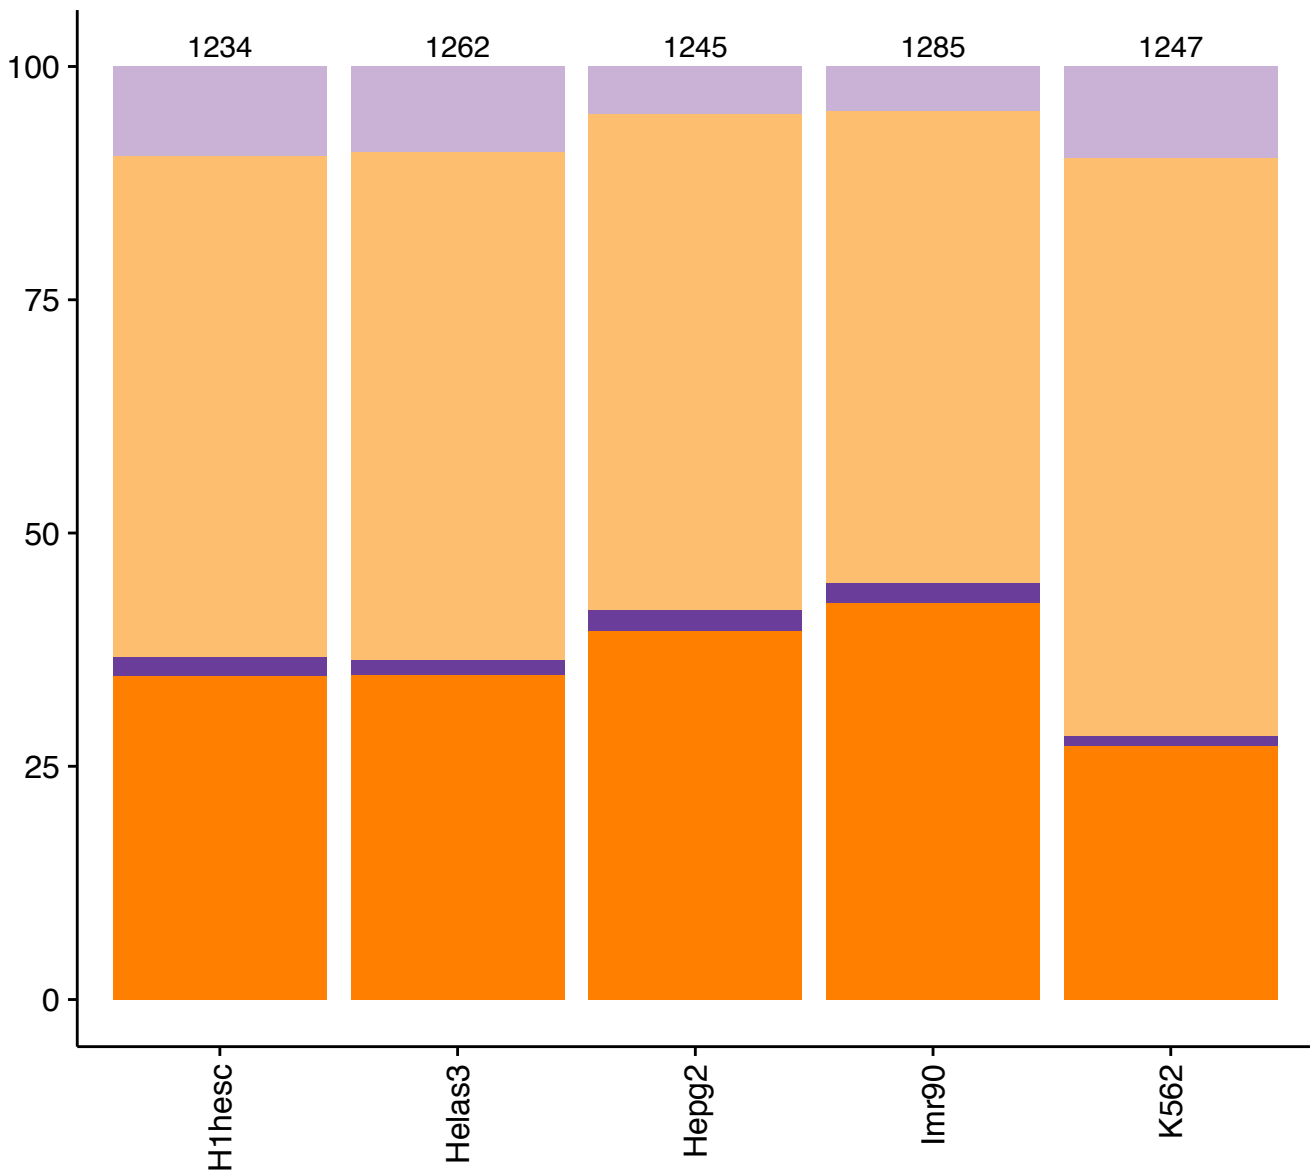

# MAZ

■ overlapped same cluster   
 ■ overlapped different cluster   
 ■ nonoverlapped same cluster   
 ■ nonoverlapped different cluster

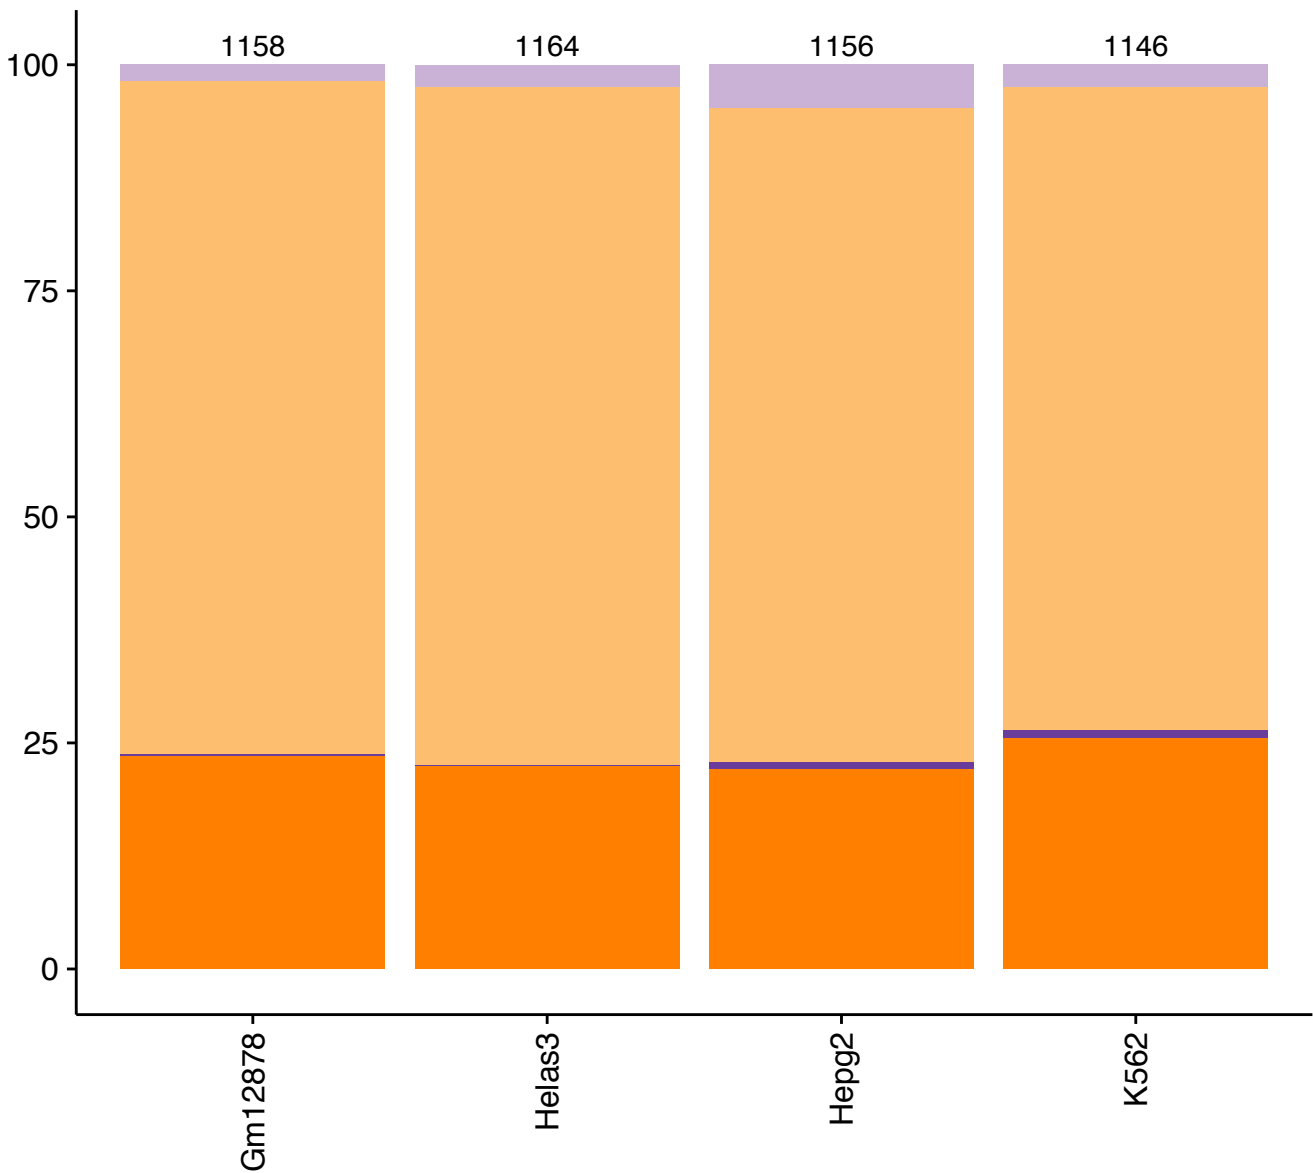

# MX11

■ overlapped same cluster   
 ■ overlapped different cluster   
 ■ nonoverlapped same cluster   
 ■ nonoverlapped different cluster

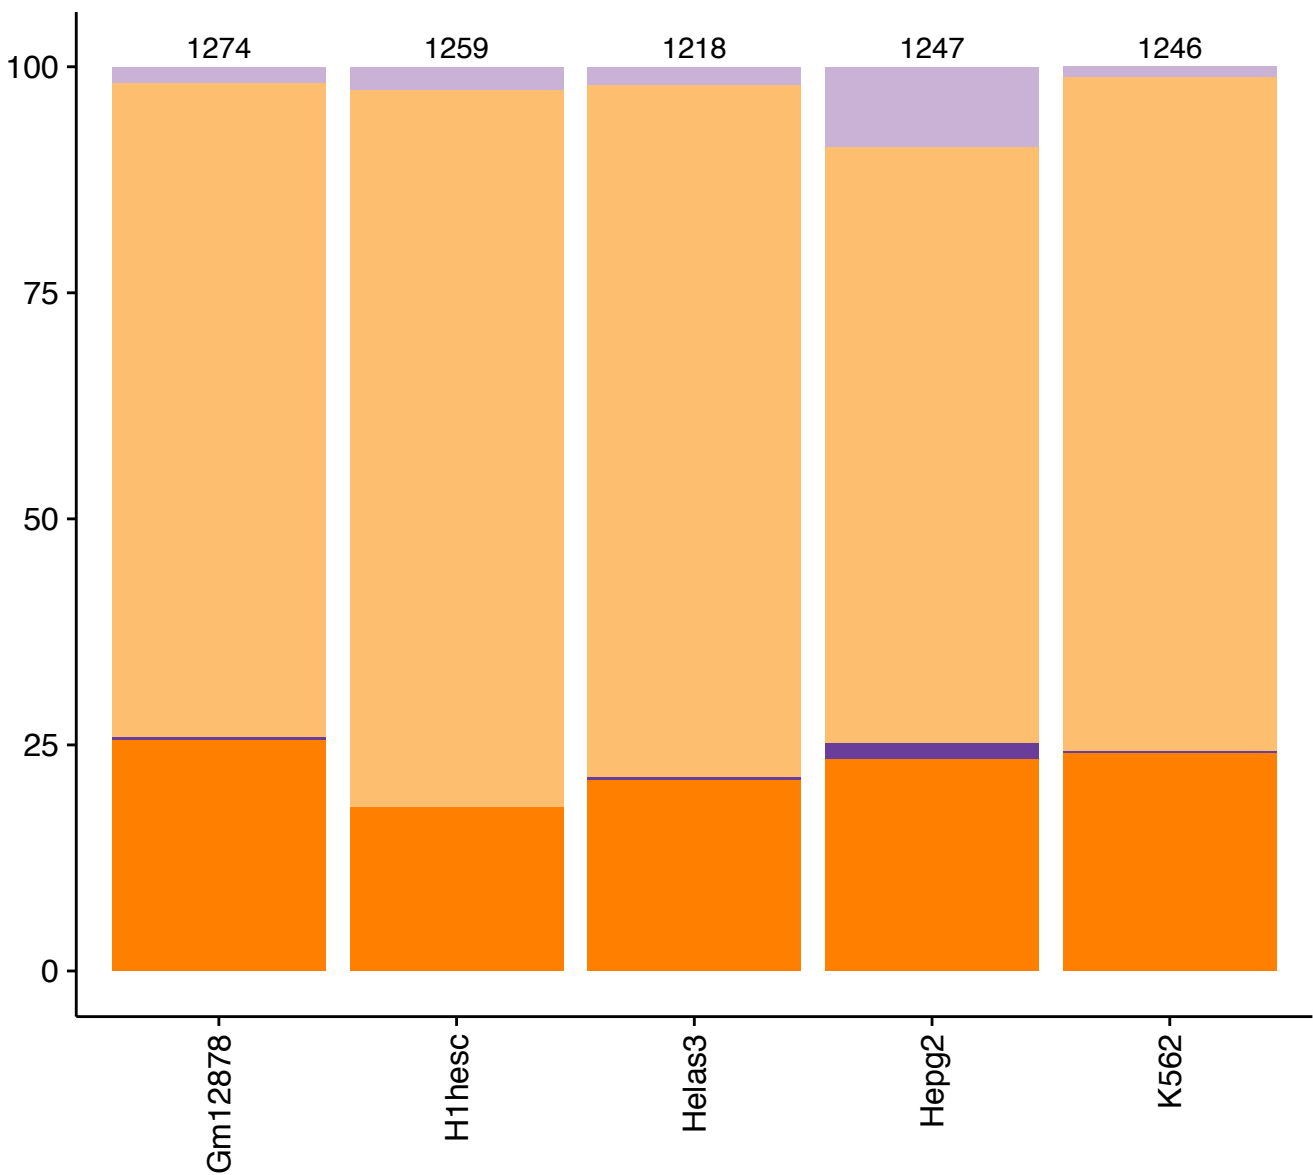

# MYC

■ overlapped same cluster   
 ■ overlapped different cluster   
 ■ nonoverlapped same cluster   
 ■ nonoverlapped different cluster

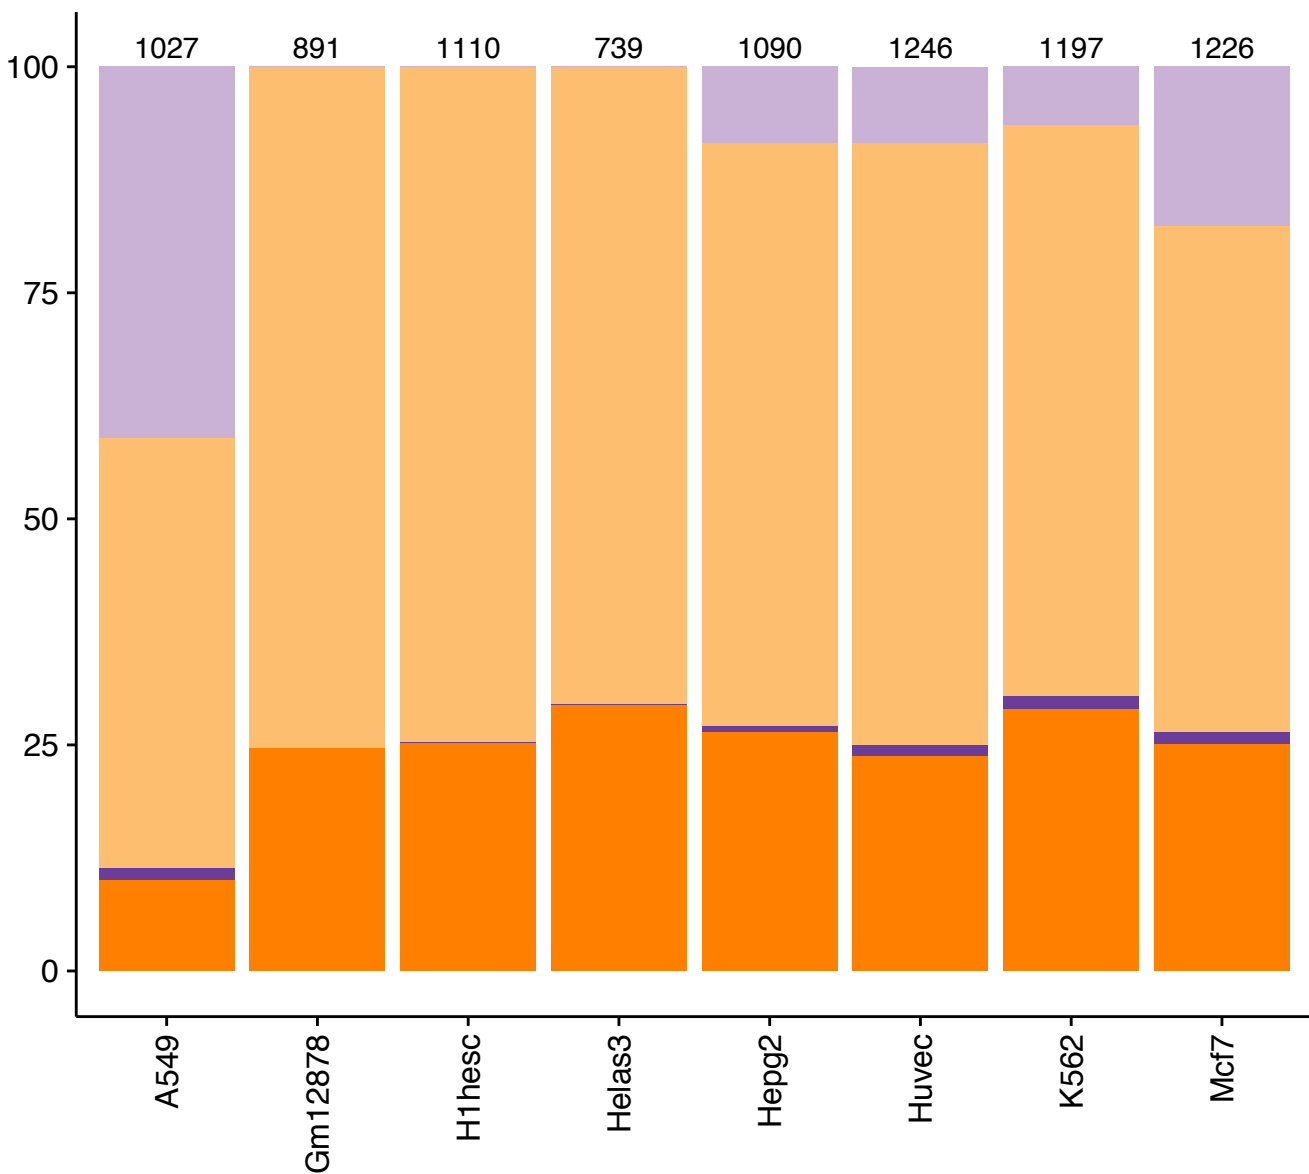

# NRF1

■ overlapped same cluster   
 ■ overlapped different cluster   
 ■ nonoverlapped same cluster   
 ■ nonoverlapped different cluster

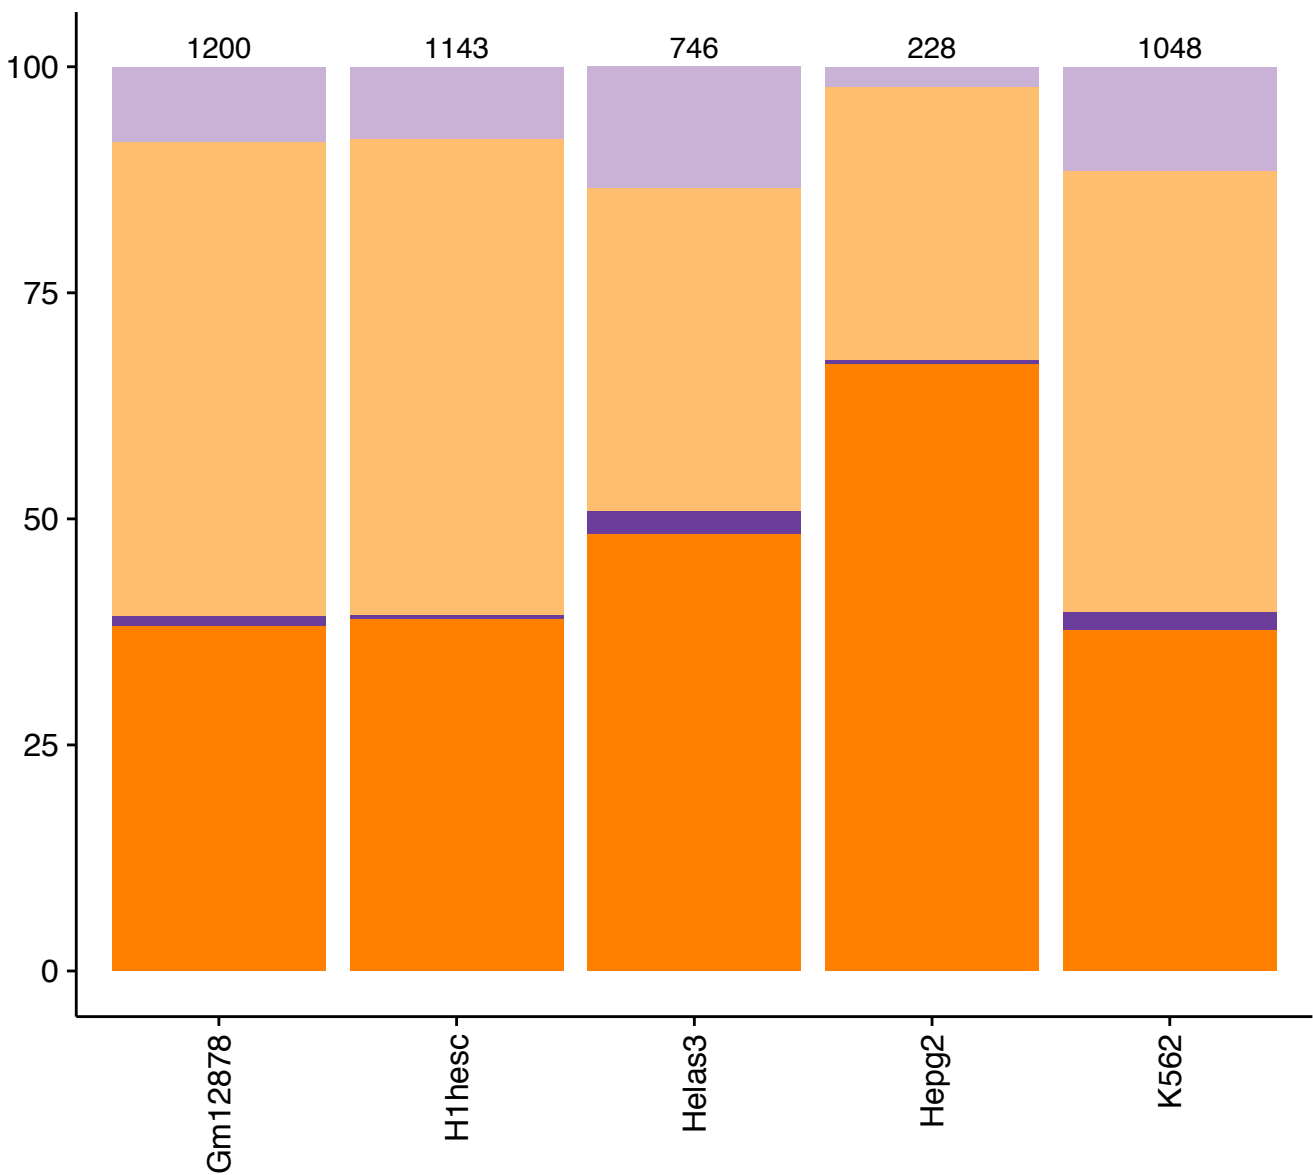

# REST

■ overlapped same cluster 
 ■ overlapped different cluster 
 ■ nonoverlapped same cluster 
 ■ nonoverlapped different cluster

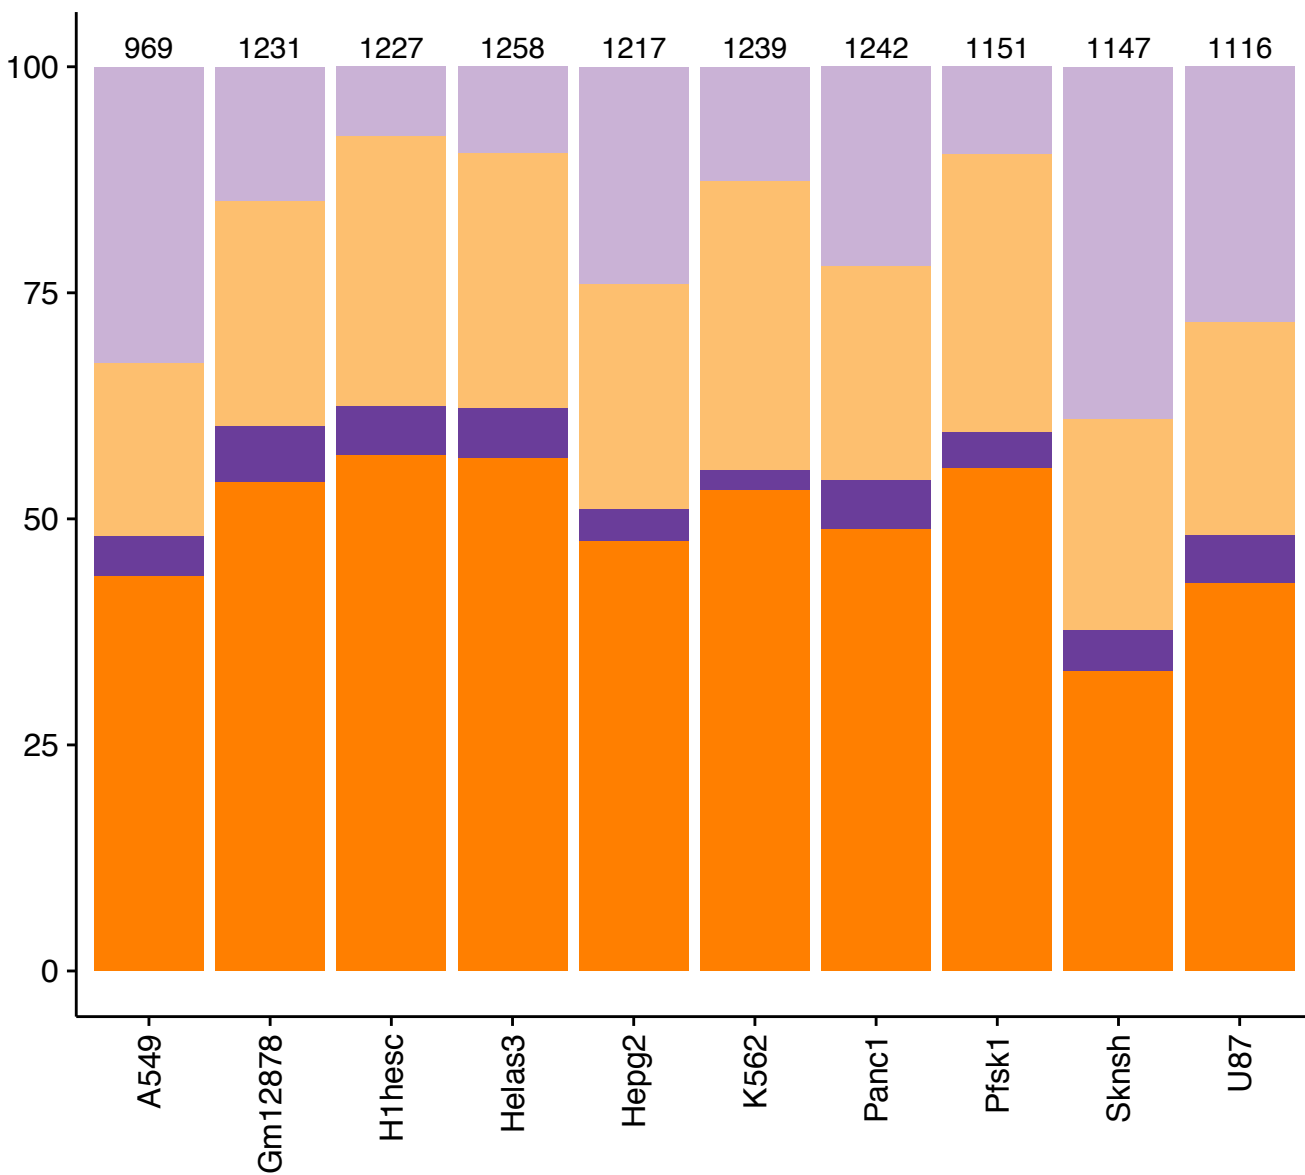



# RFX5

■ overlapped same cluster   
 ■ overlapped different cluster   
 ■ nonoverlapped same cluster   
 ■ nonoverlapped different cluster

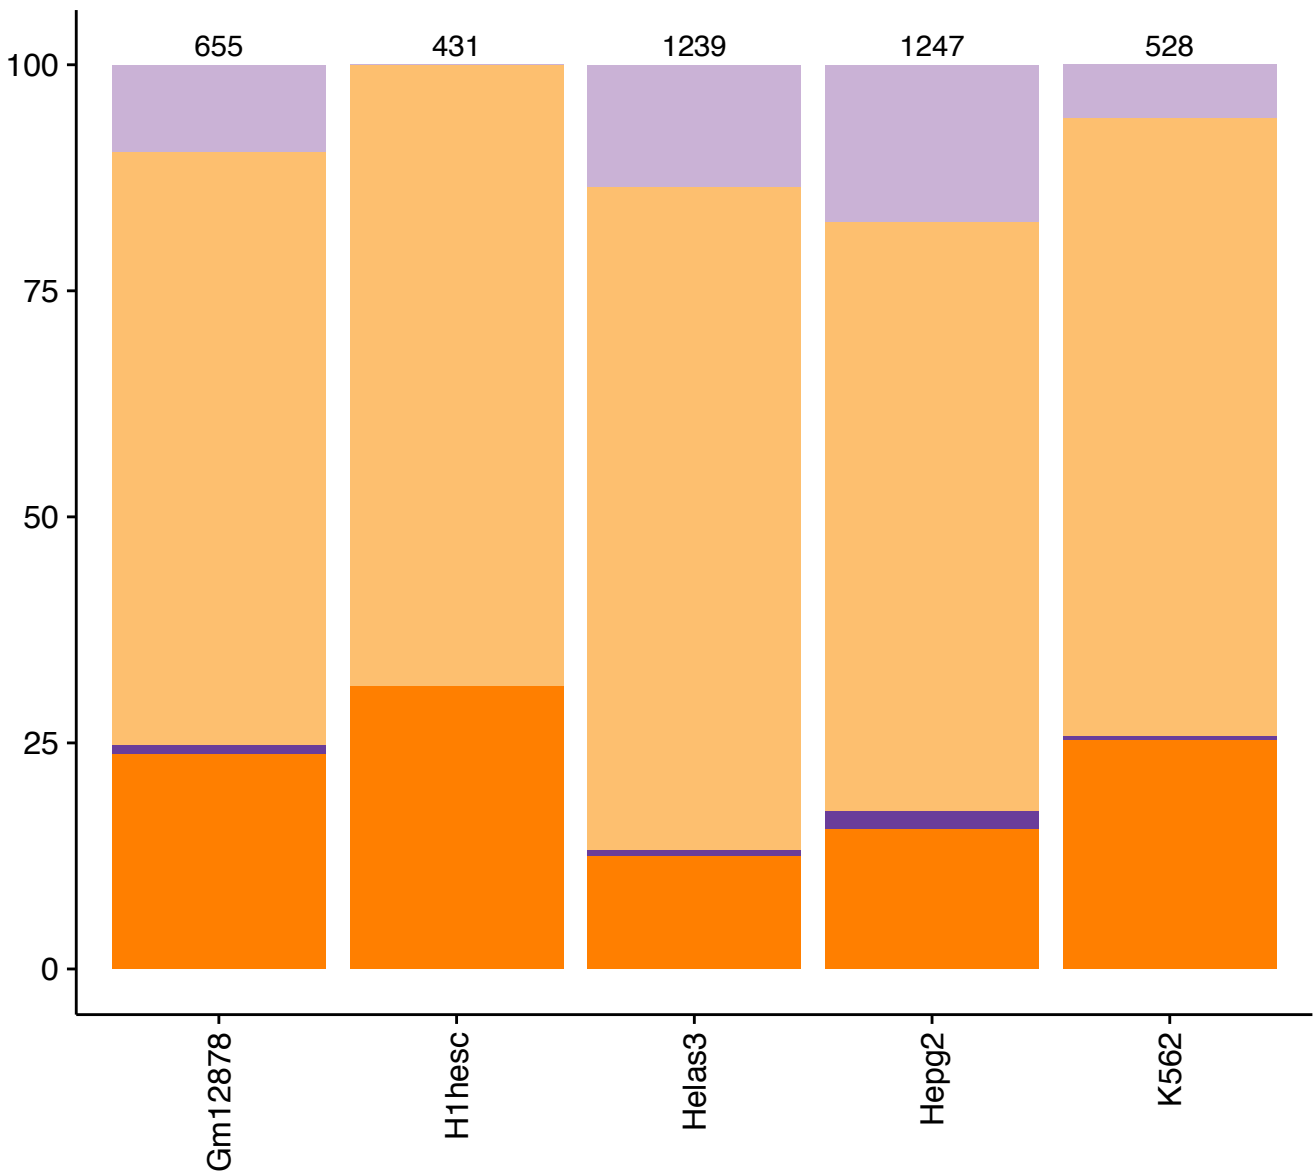

# SRF

■ overlapped same cluster   
 ■ overlapped different cluster   
 ■ nonoverlapped same cluster   
 ■ nonoverlapped different cluster

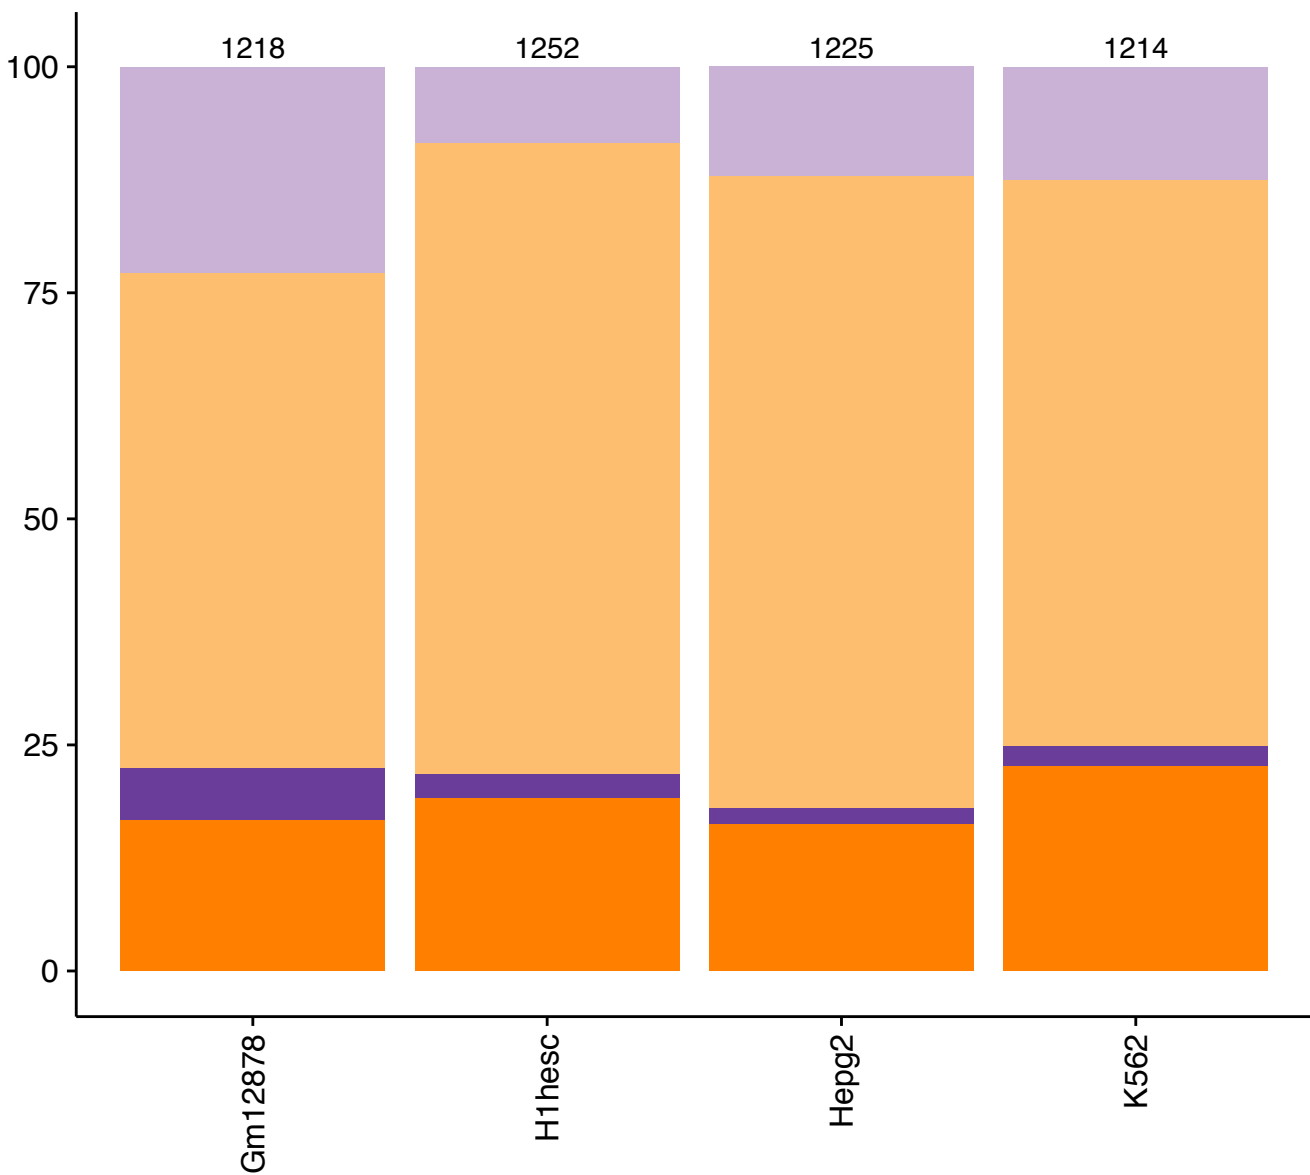

# TBP

■ overlapped same cluster   
 ■ overlapped different cluster   
 ■ nonoverlapped same cluster   
 ■ nonoverlapped different cluster

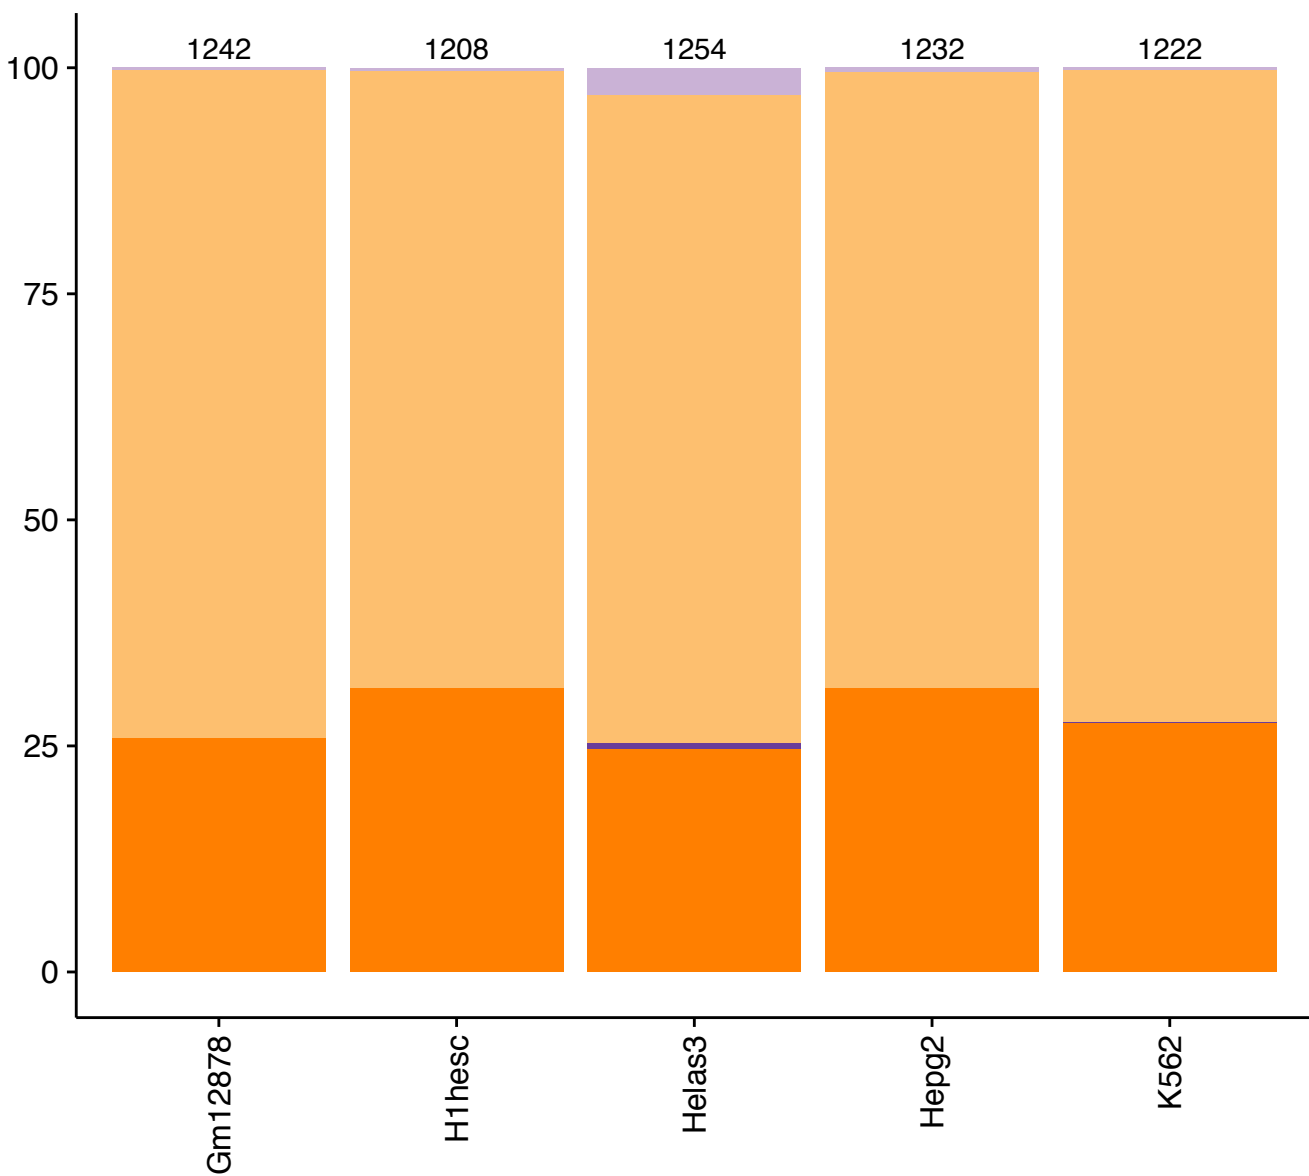

# TCF12

■ overlapped same cluster
 ■ overlapped different cluster
 ■ nonoverlapped same cluster
 ■ nonoverlapped different cluster

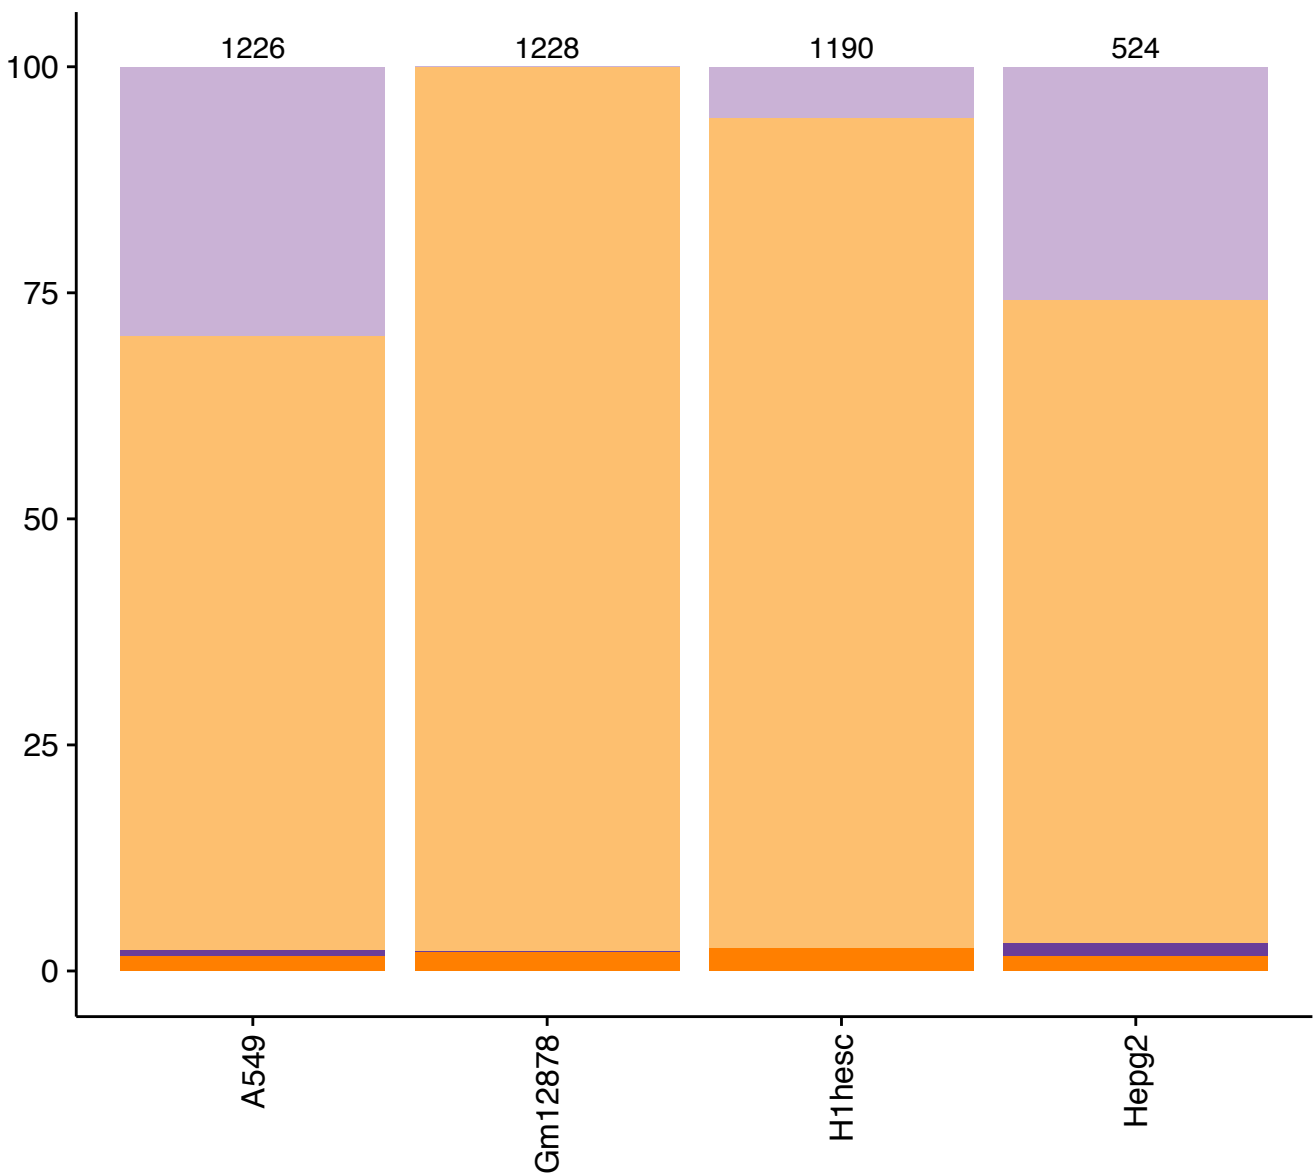

# TCF7L2

■ overlapped same cluster   
 ■ overlapped different cluster   
 ■ nonoverlapped same cluster   
 ■ nonoverlapped different cluster

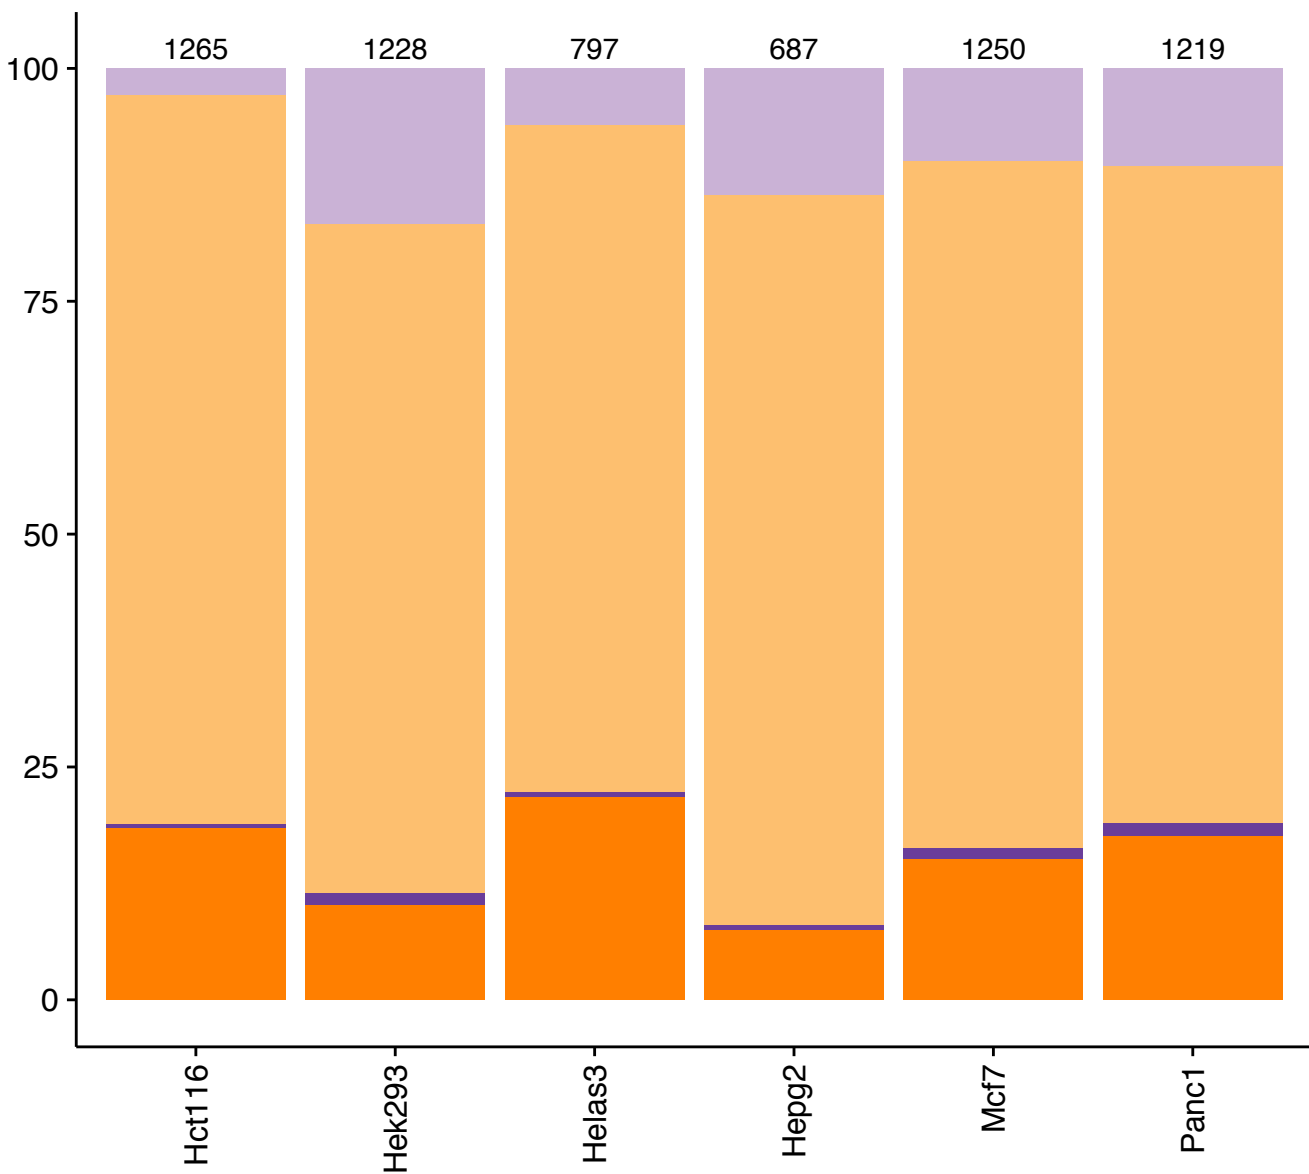

# USF1

■ overlapped same cluster   
 ■ overlapped different cluster   
 ■ nonoverlapped same cluster   
 ■ nonoverlapped different cluster

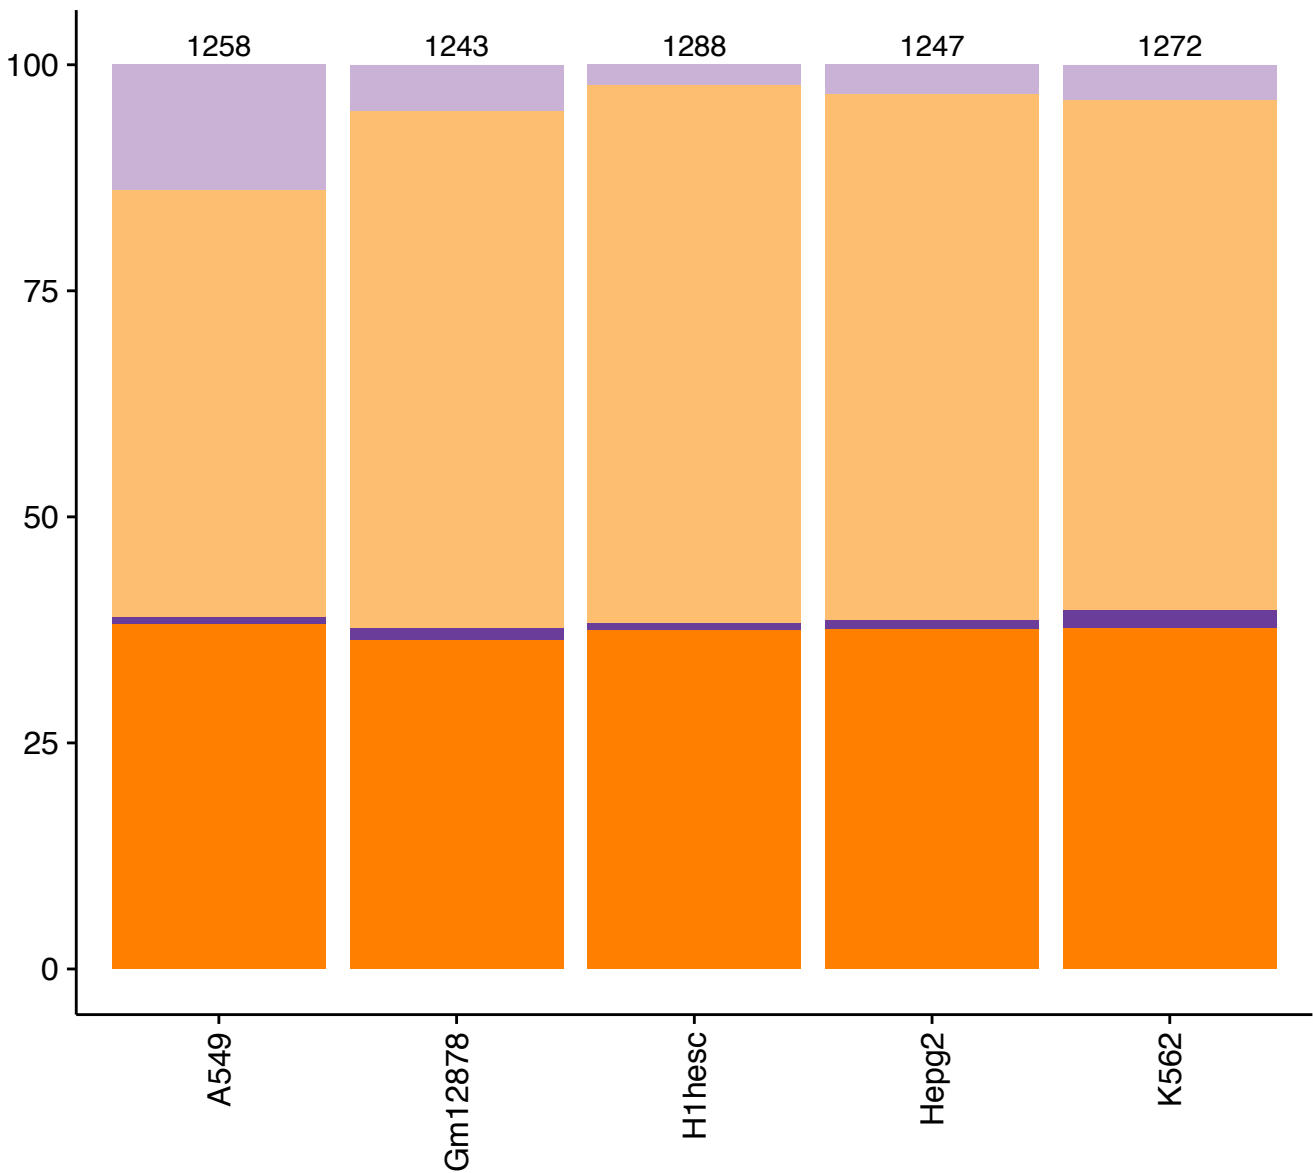

YY1

overlapped same cluster overlapped different cluster nonoverlapped same cluster nonoverlapped different cluster

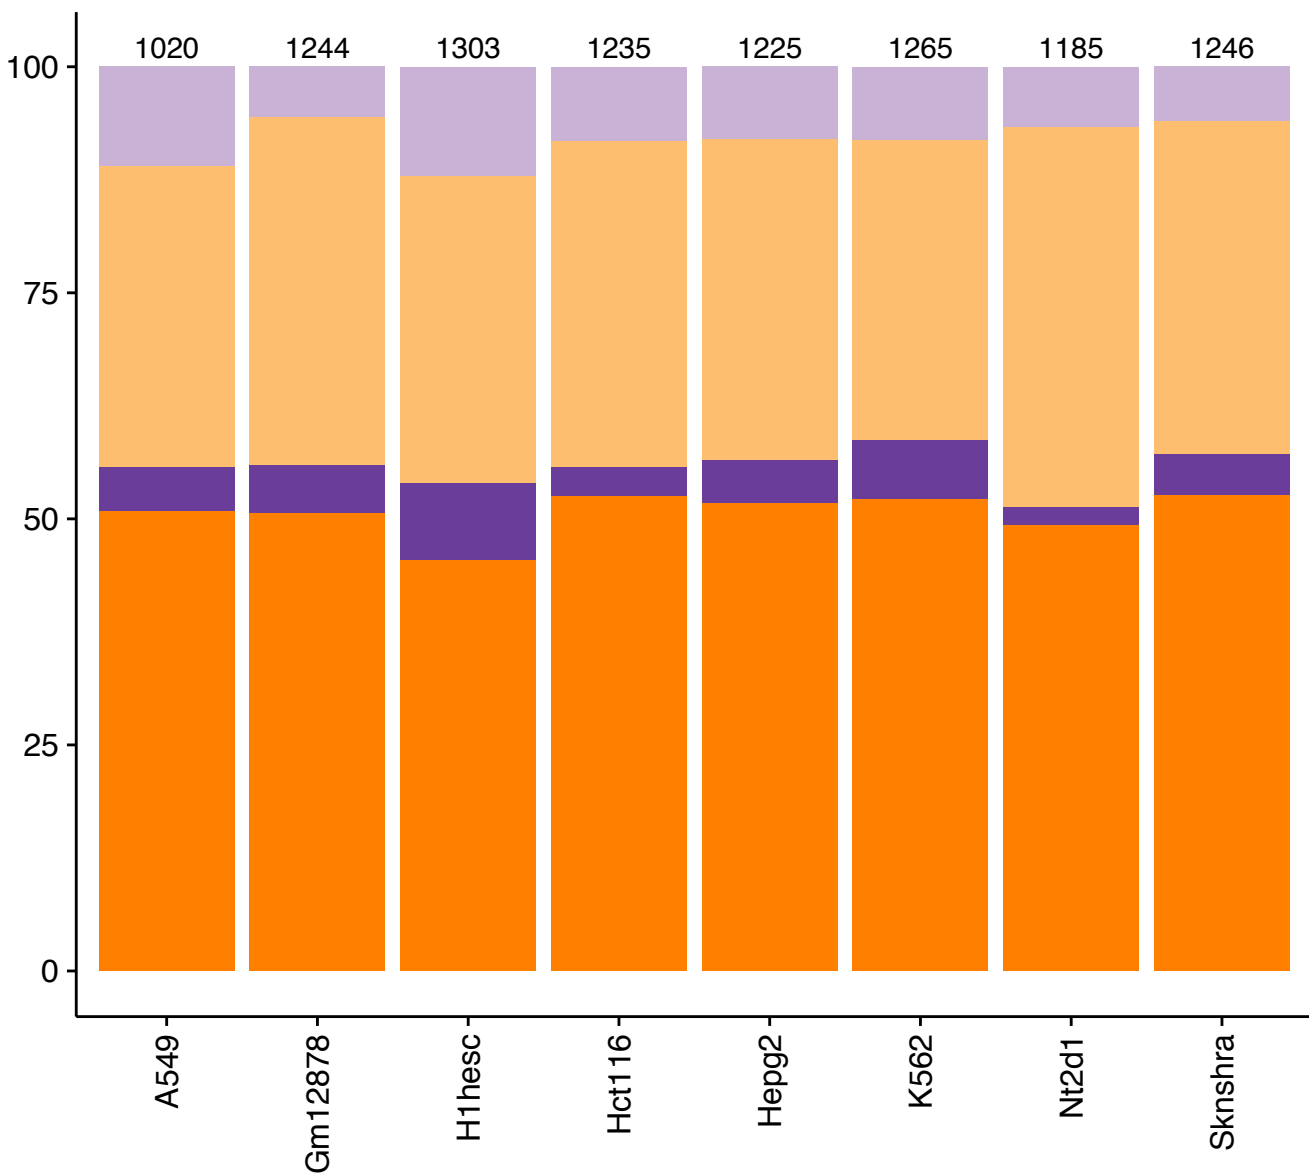

# ZNF143

■ overlapped same cluster
 ■ overlapped different cluster
 ■ nonoverlapped same cluster
 ■ nonoverlapped different cluster

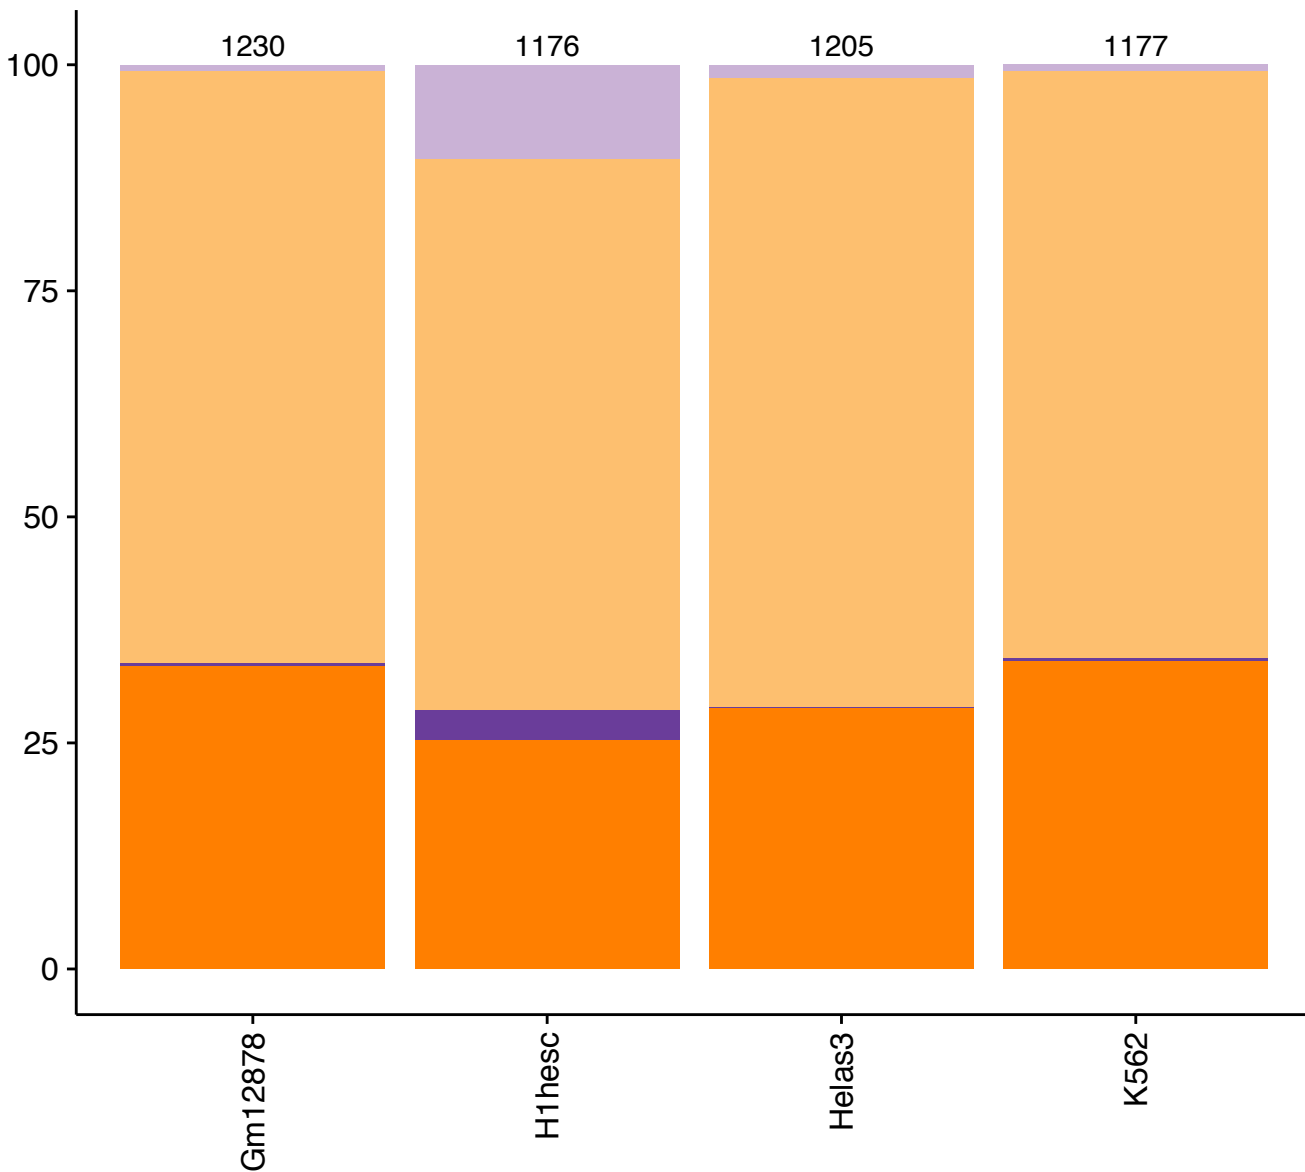

Supplement: Supplemental_Fig_S4.pdf [file Supplemental_Fig_S4.pdf]
