# Supplementary material for: Heterogeneity of transcription factor binding specificity models within and across cell lines
Source: HighWire-hosted journal article supplement (doi:10.1101/gr.199166.115), 2016-06-16

**Figure S8.** Relationship between model accuracy and sequence size. In each plot, color is used to indicate models from different cell lines.

# ATF3

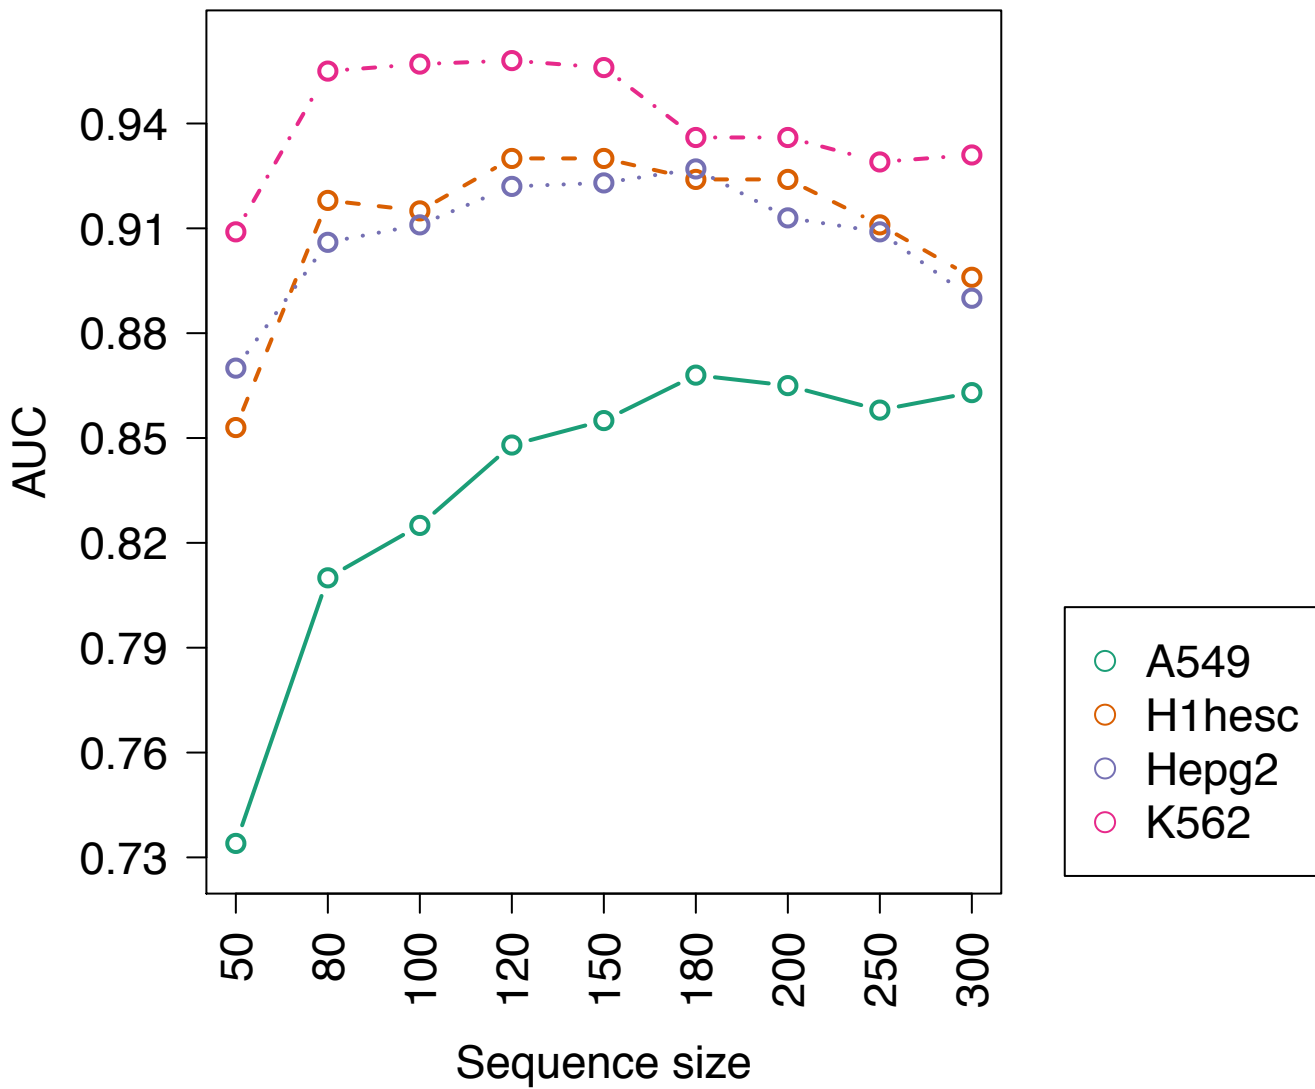

# BHLHE40

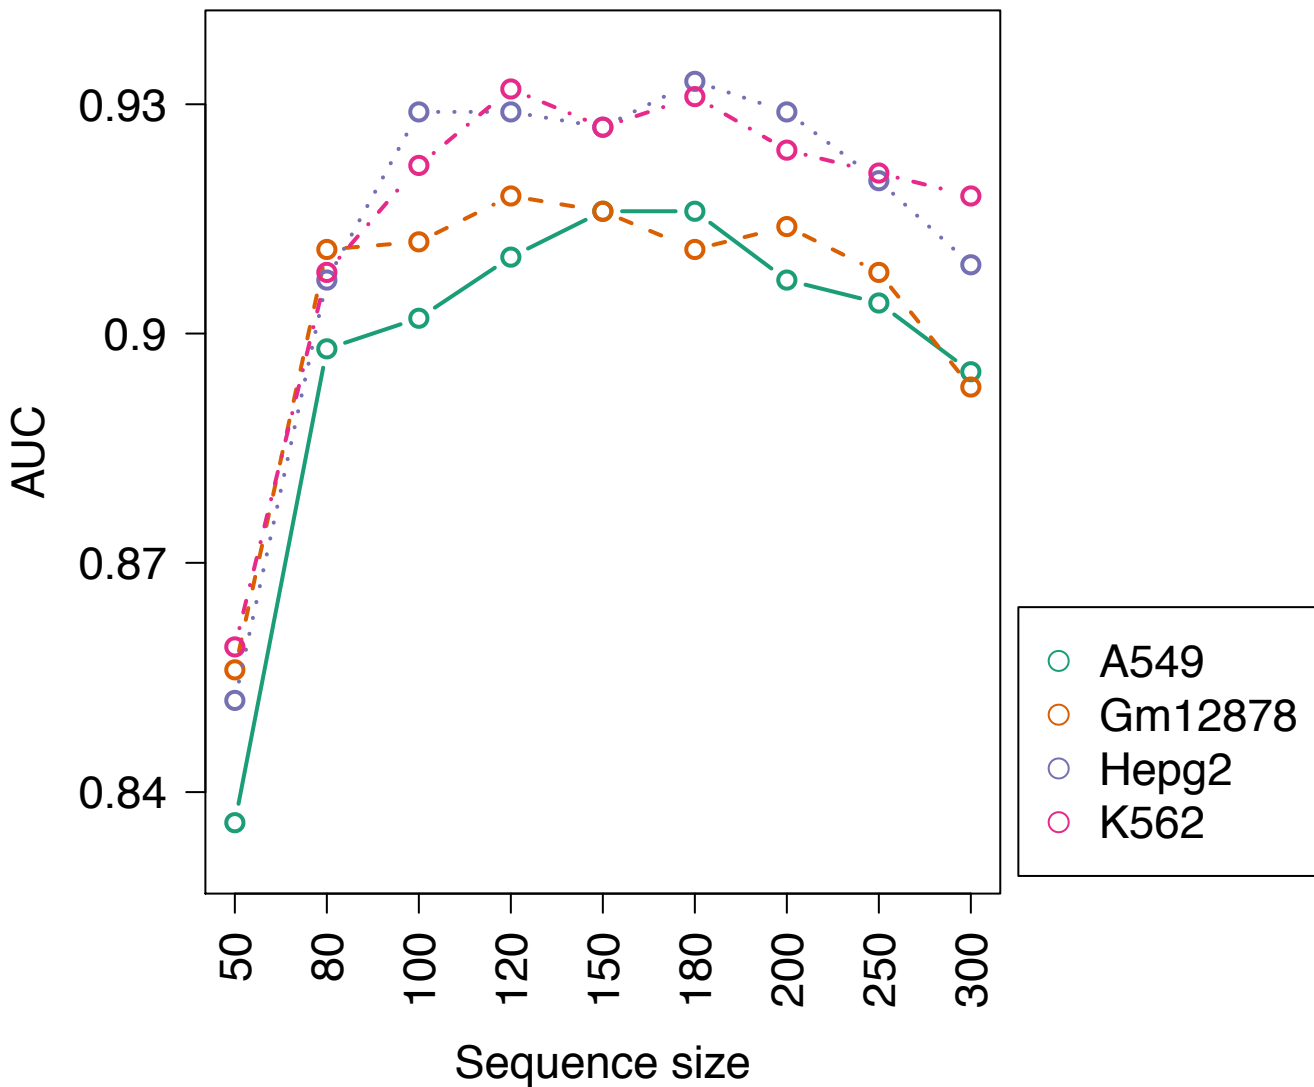

## CEBPB

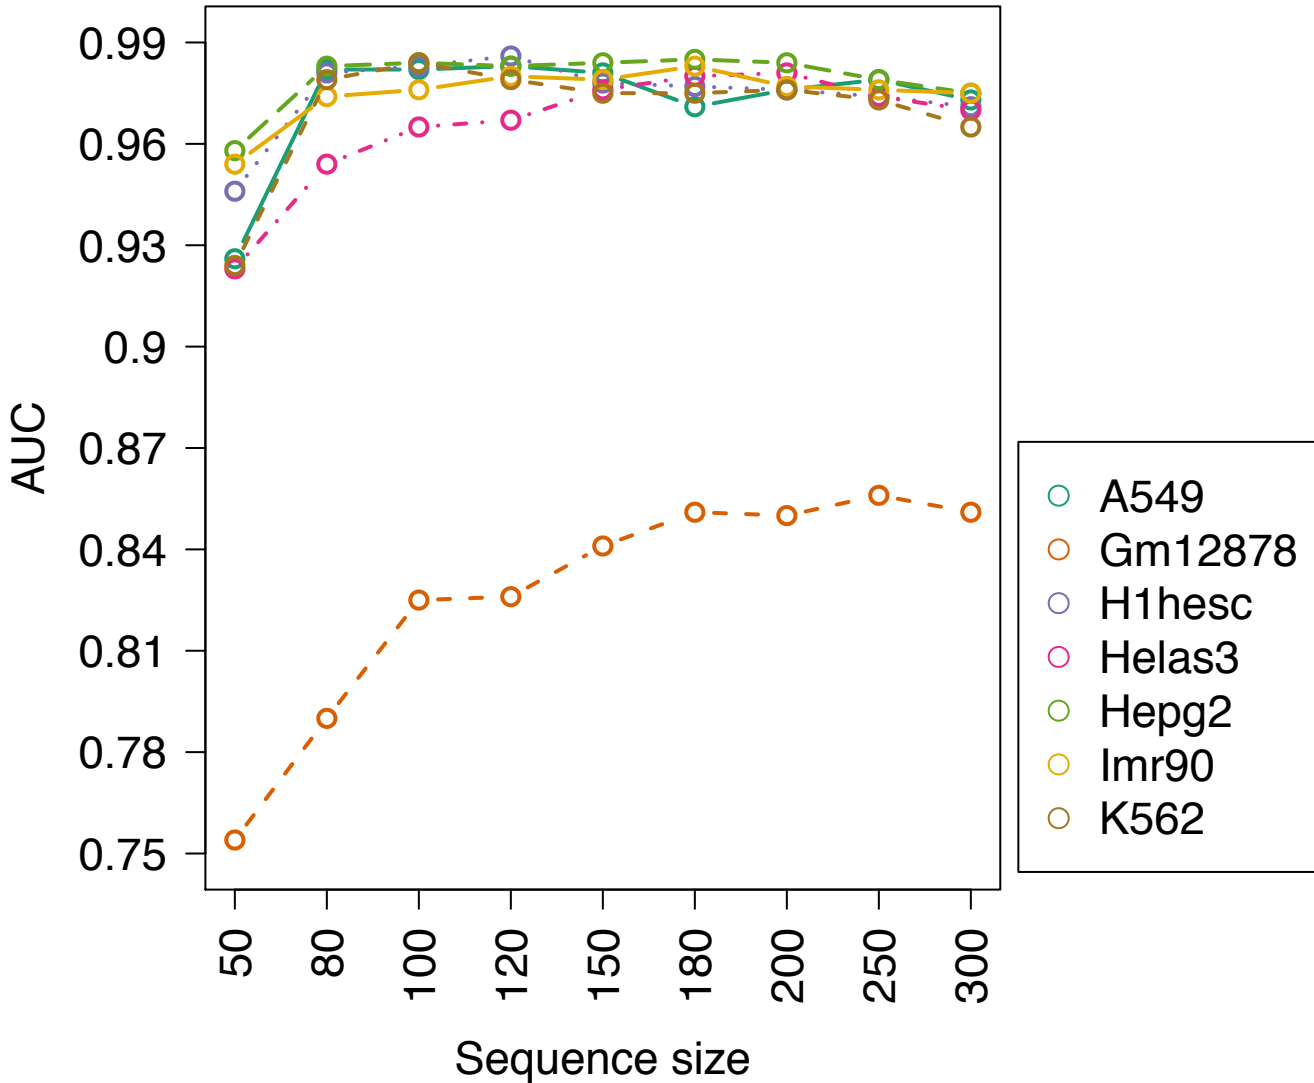

# CTCF

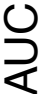

# EP300

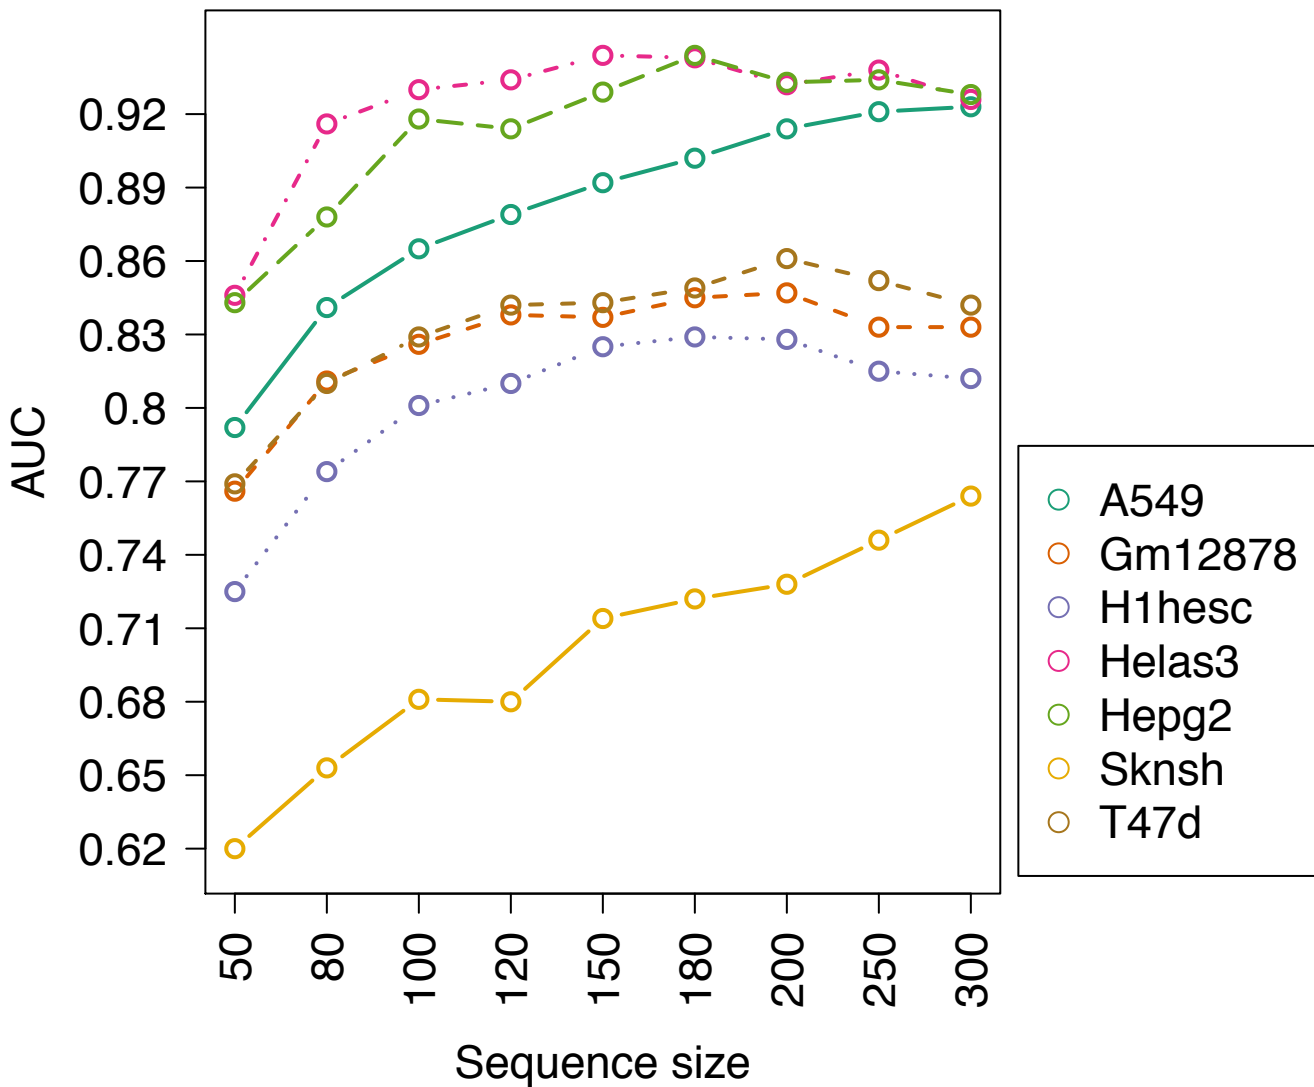

# FOS

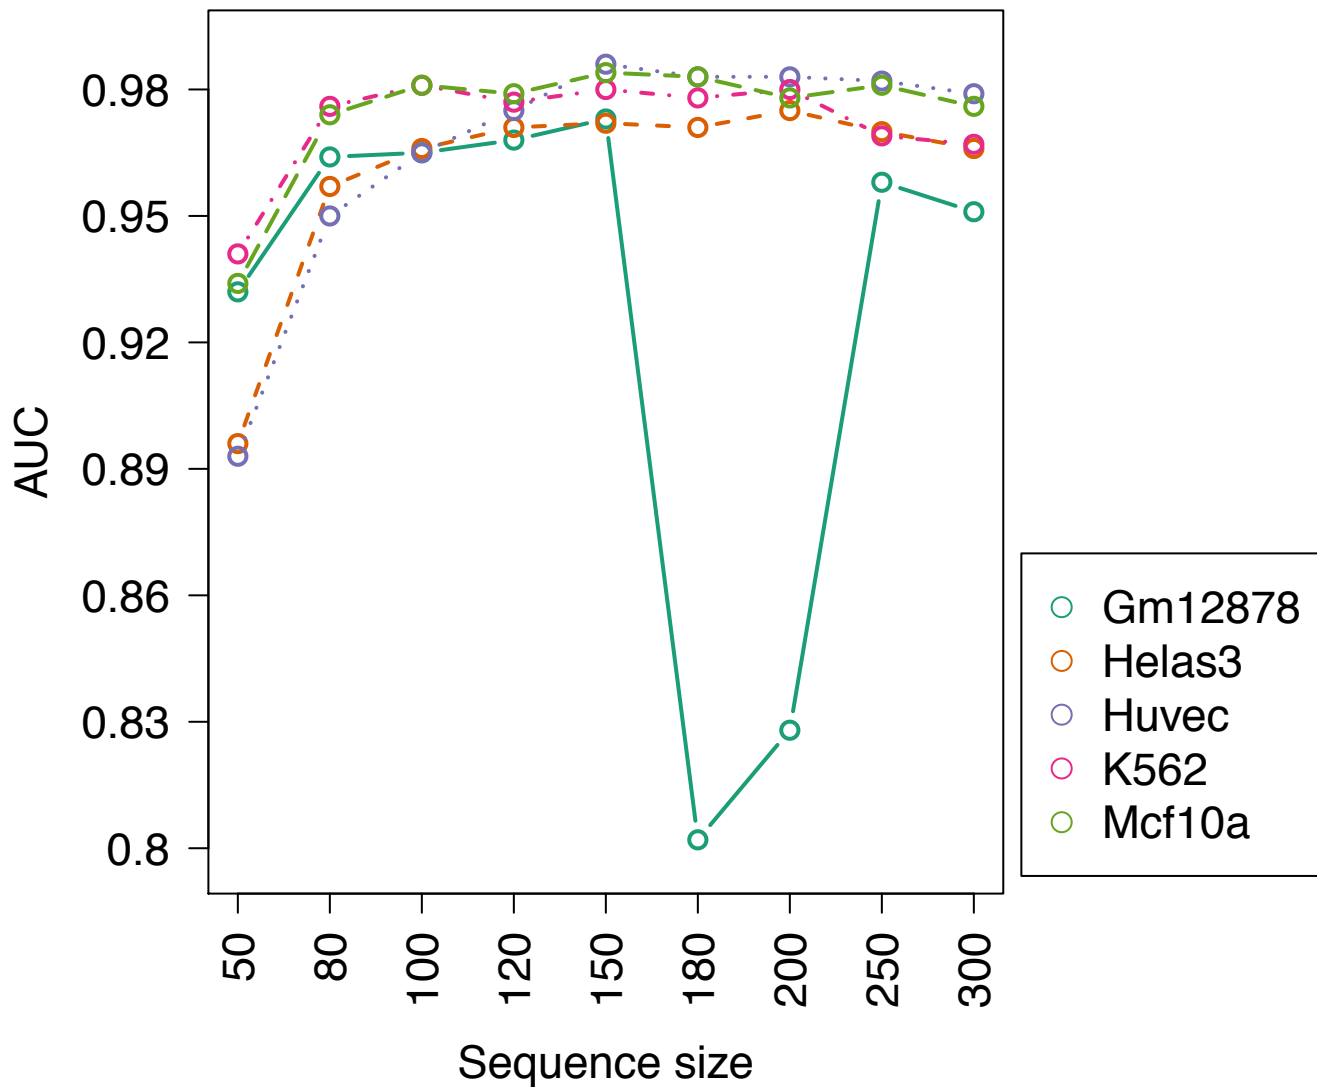

## GABPA

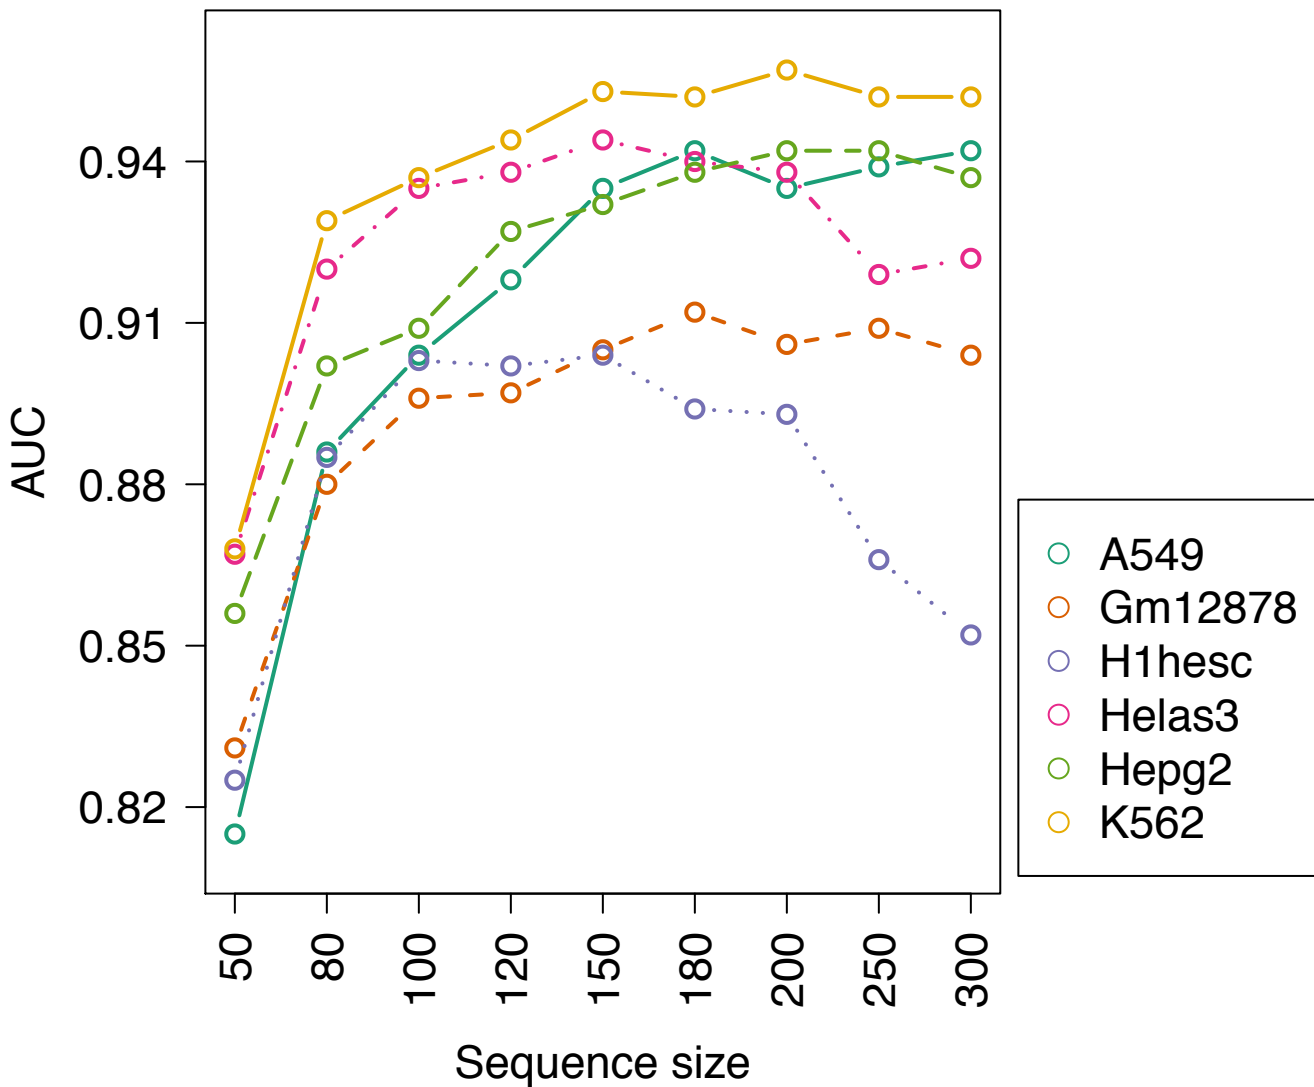



JUN

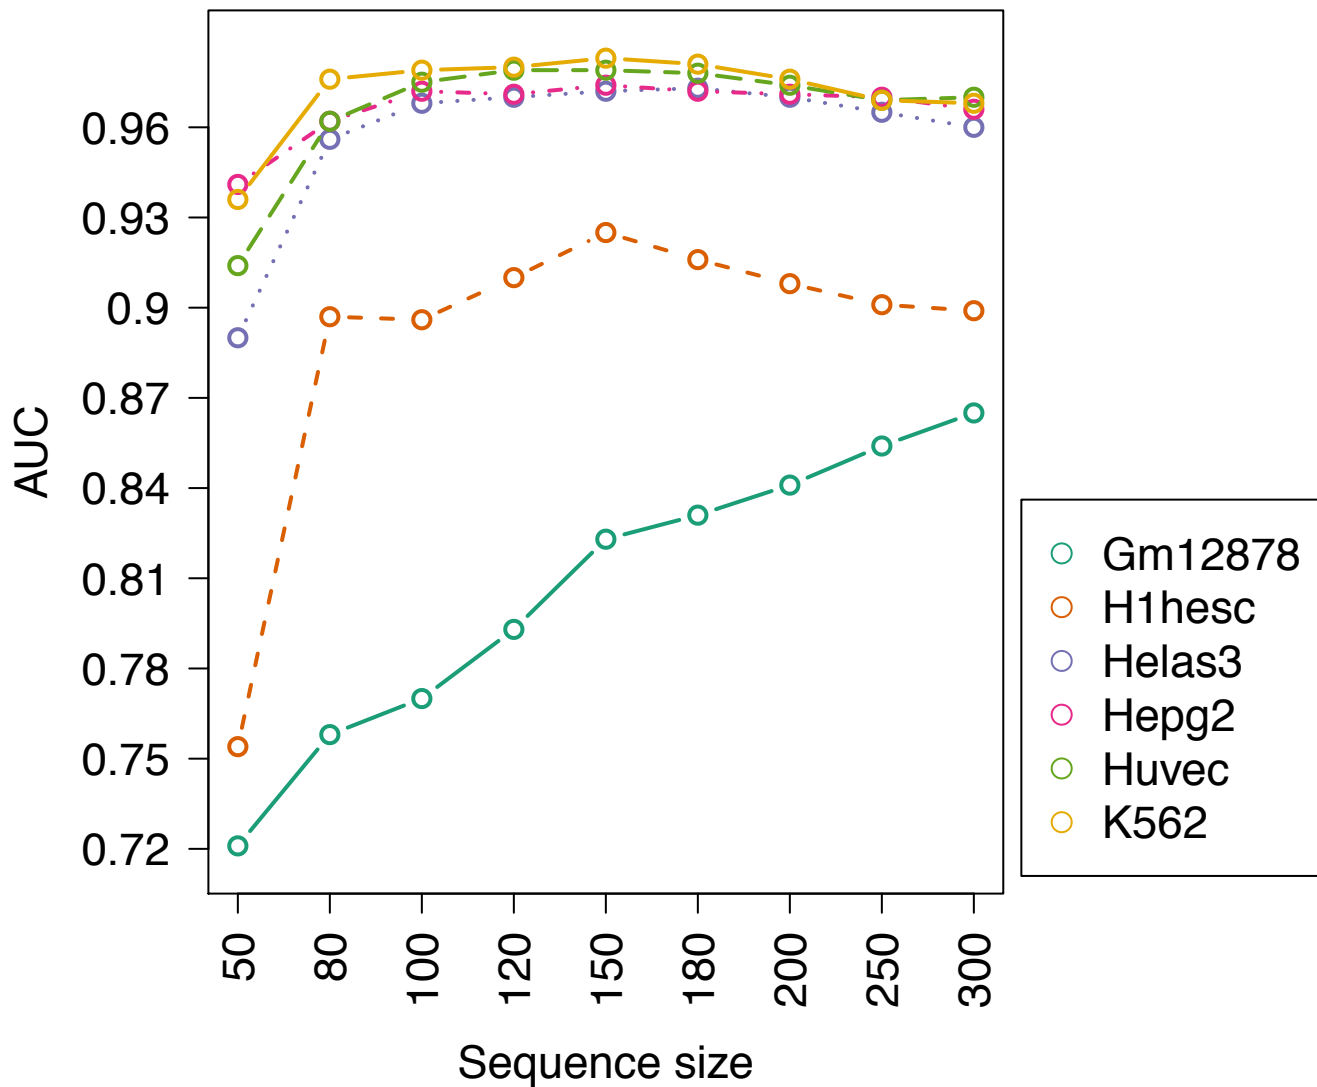

# JUND

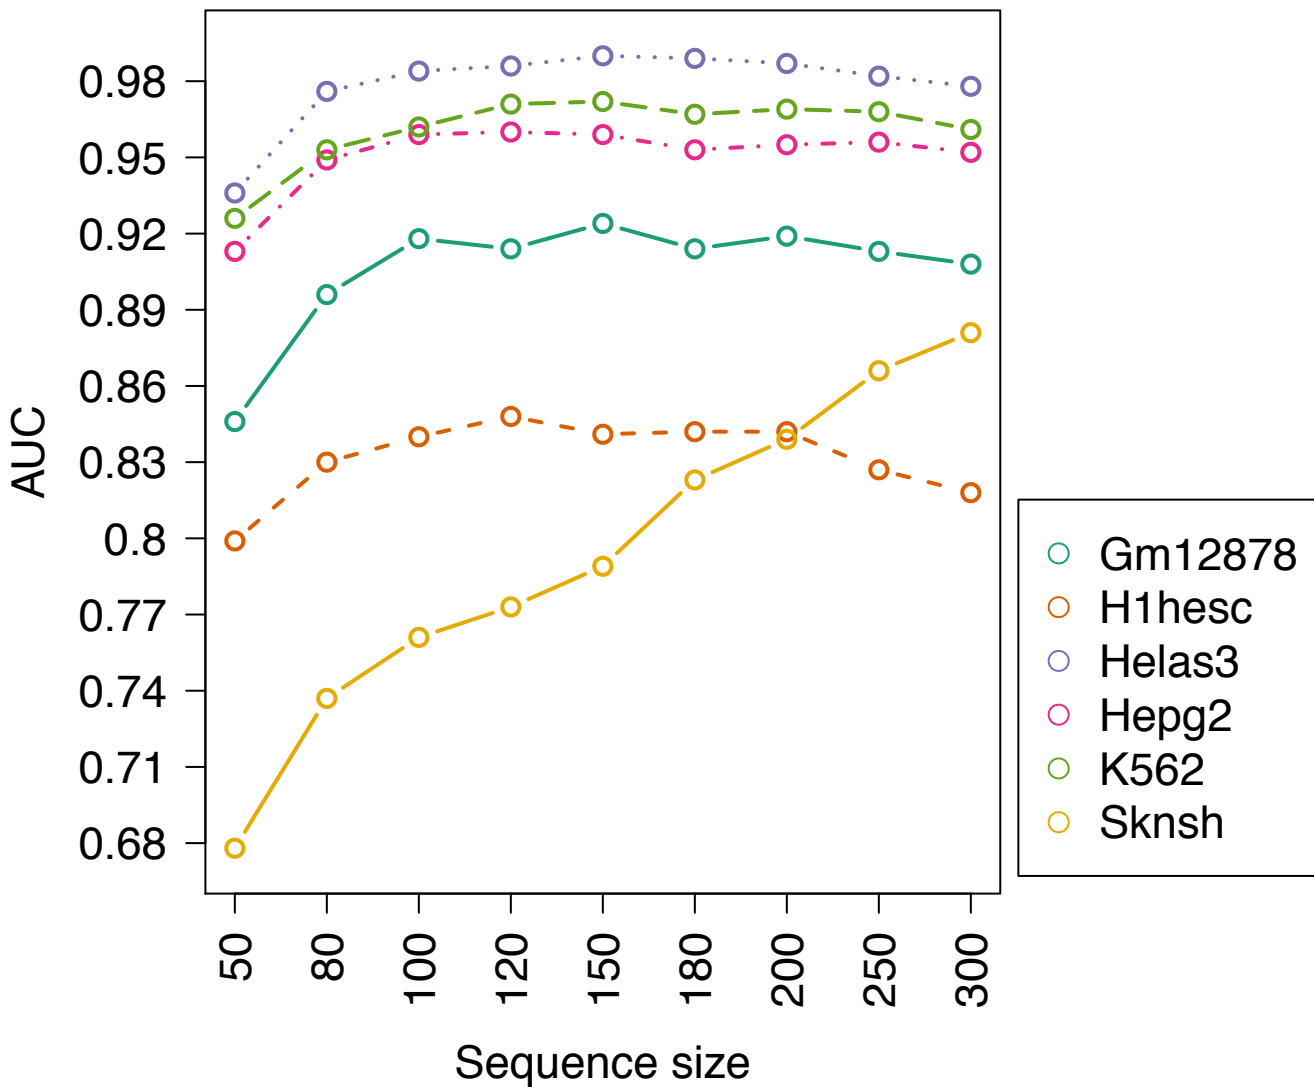

# MAFK

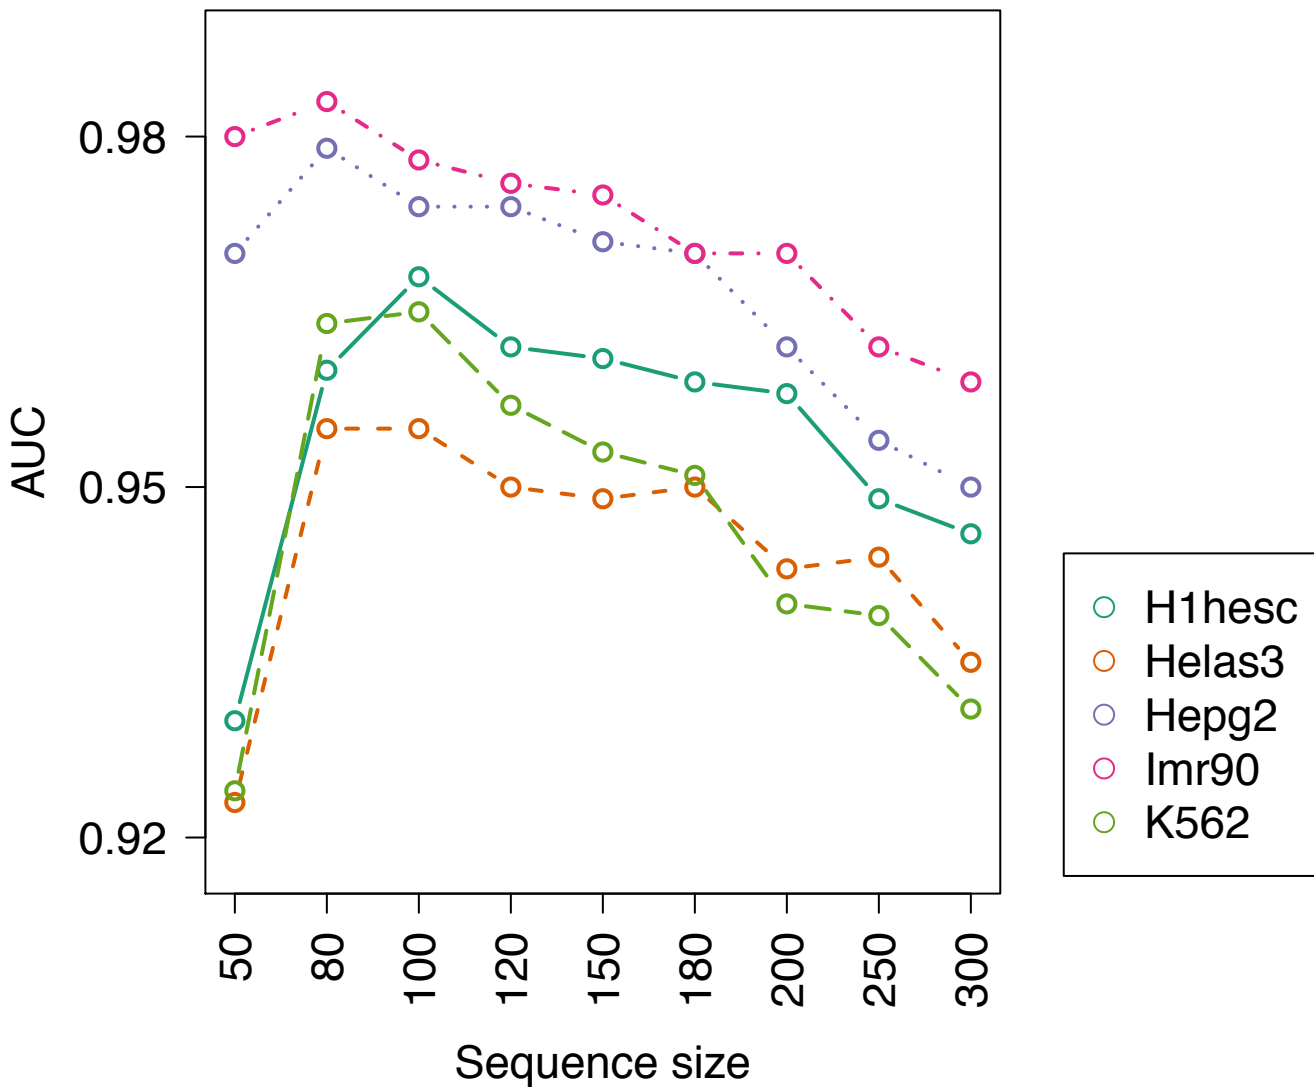

# MAZ

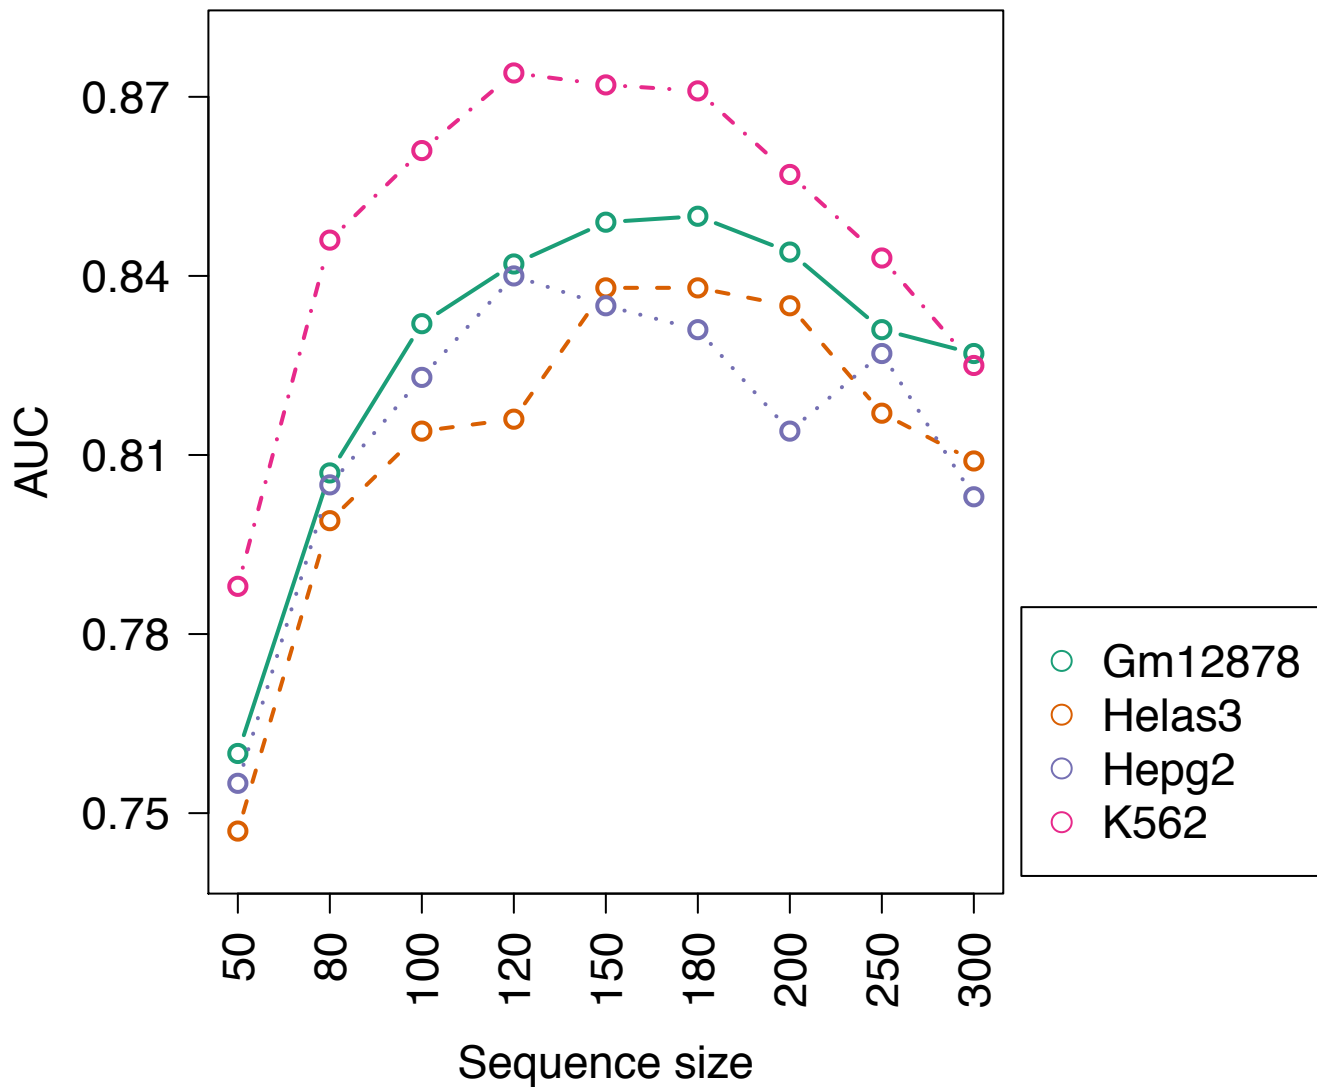

# MXI1

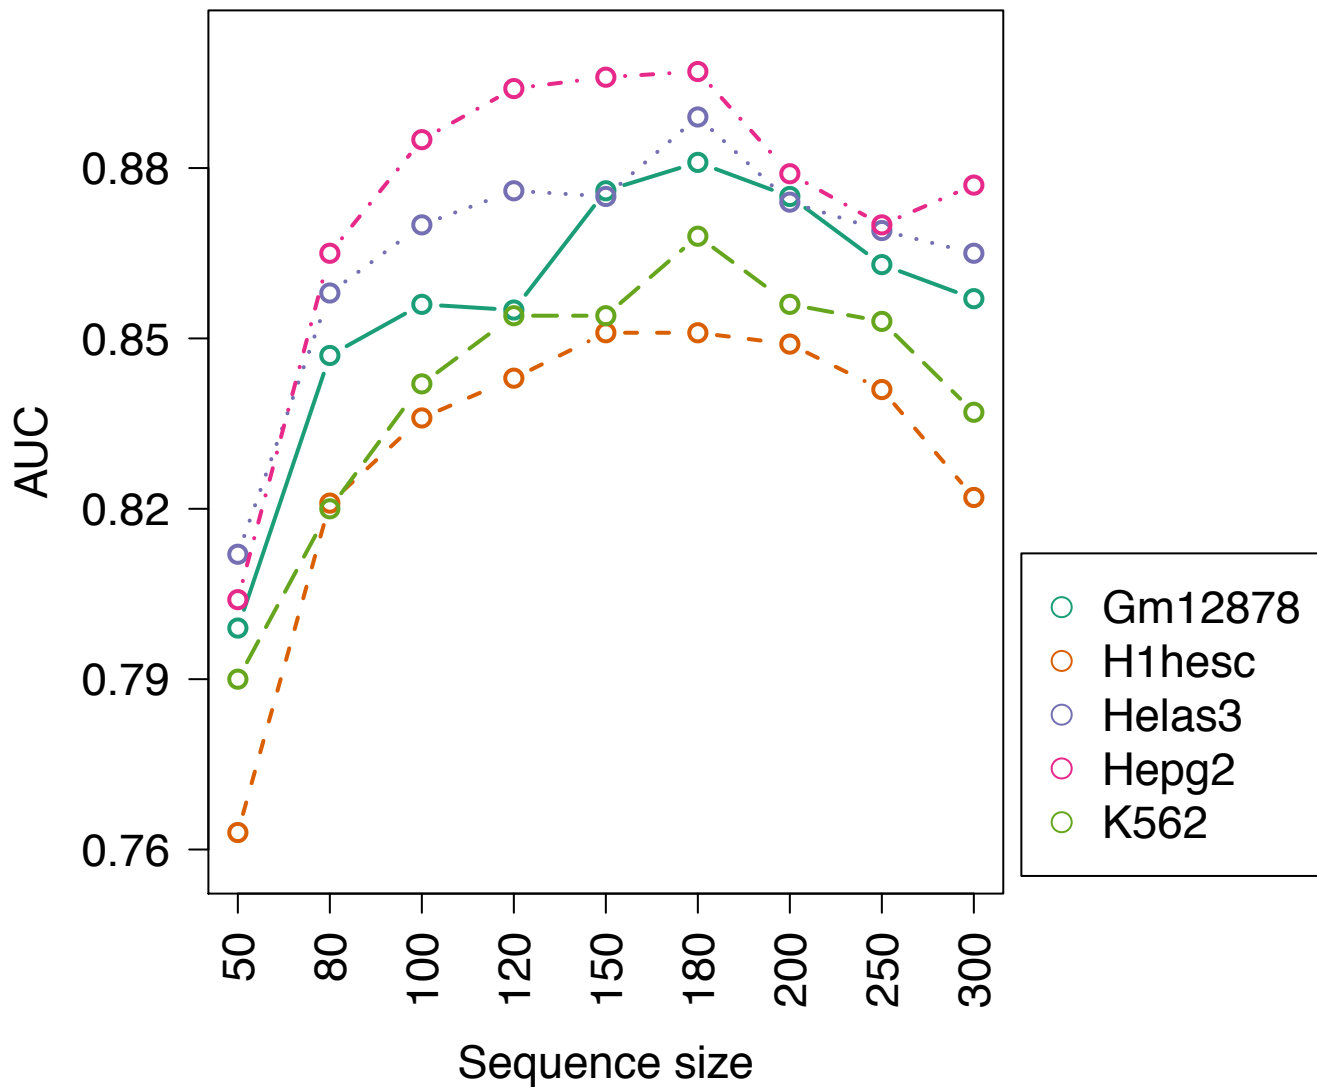

# MYC

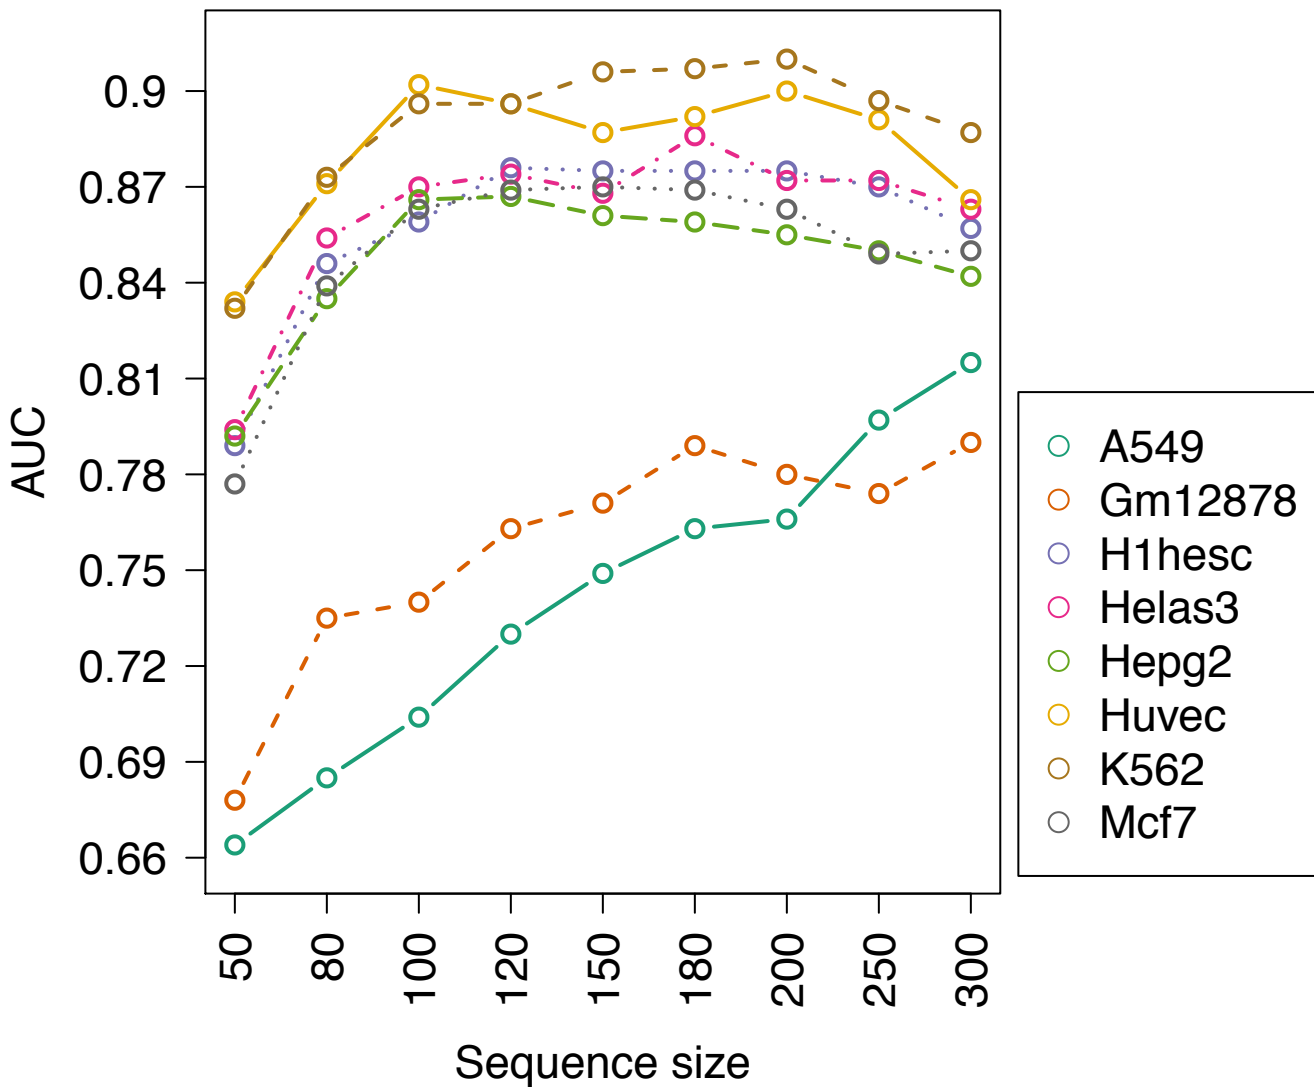

# NRF1

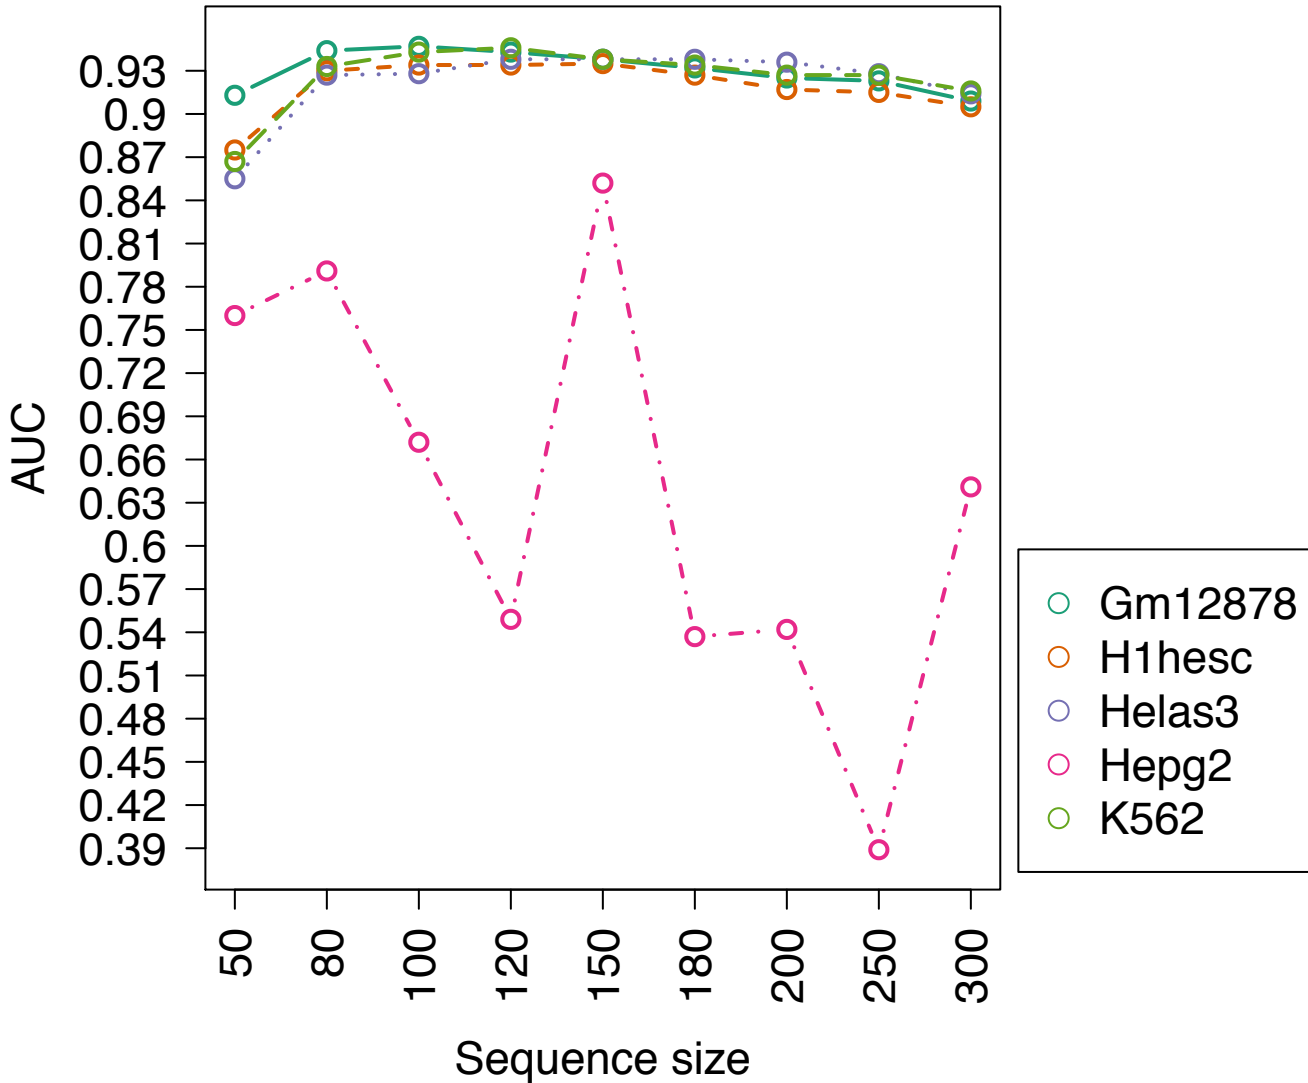

# REST

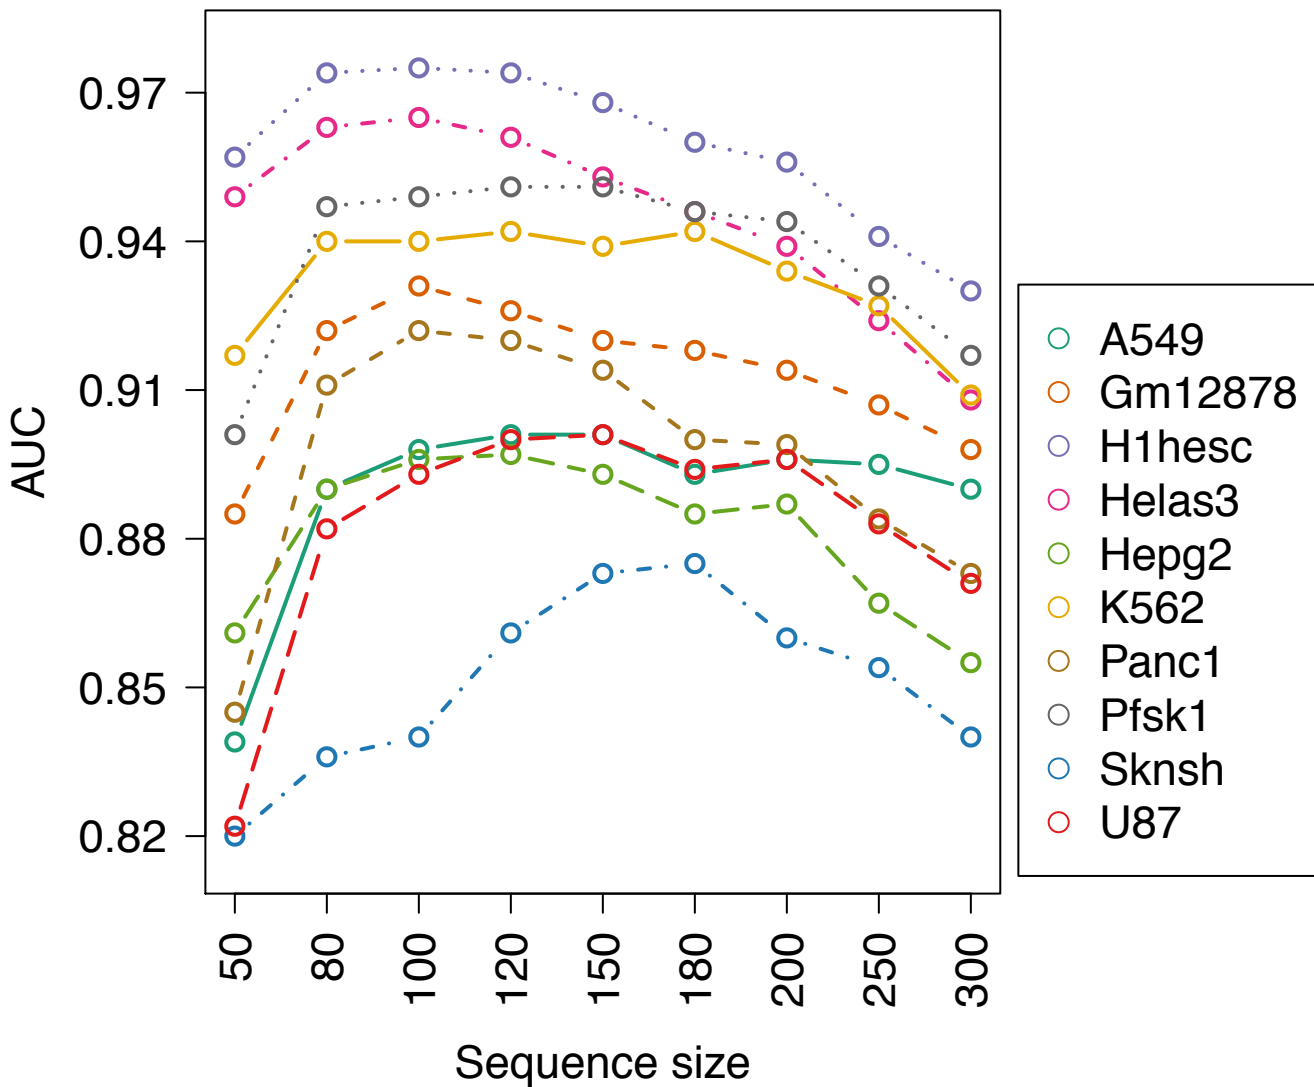



# RFX5

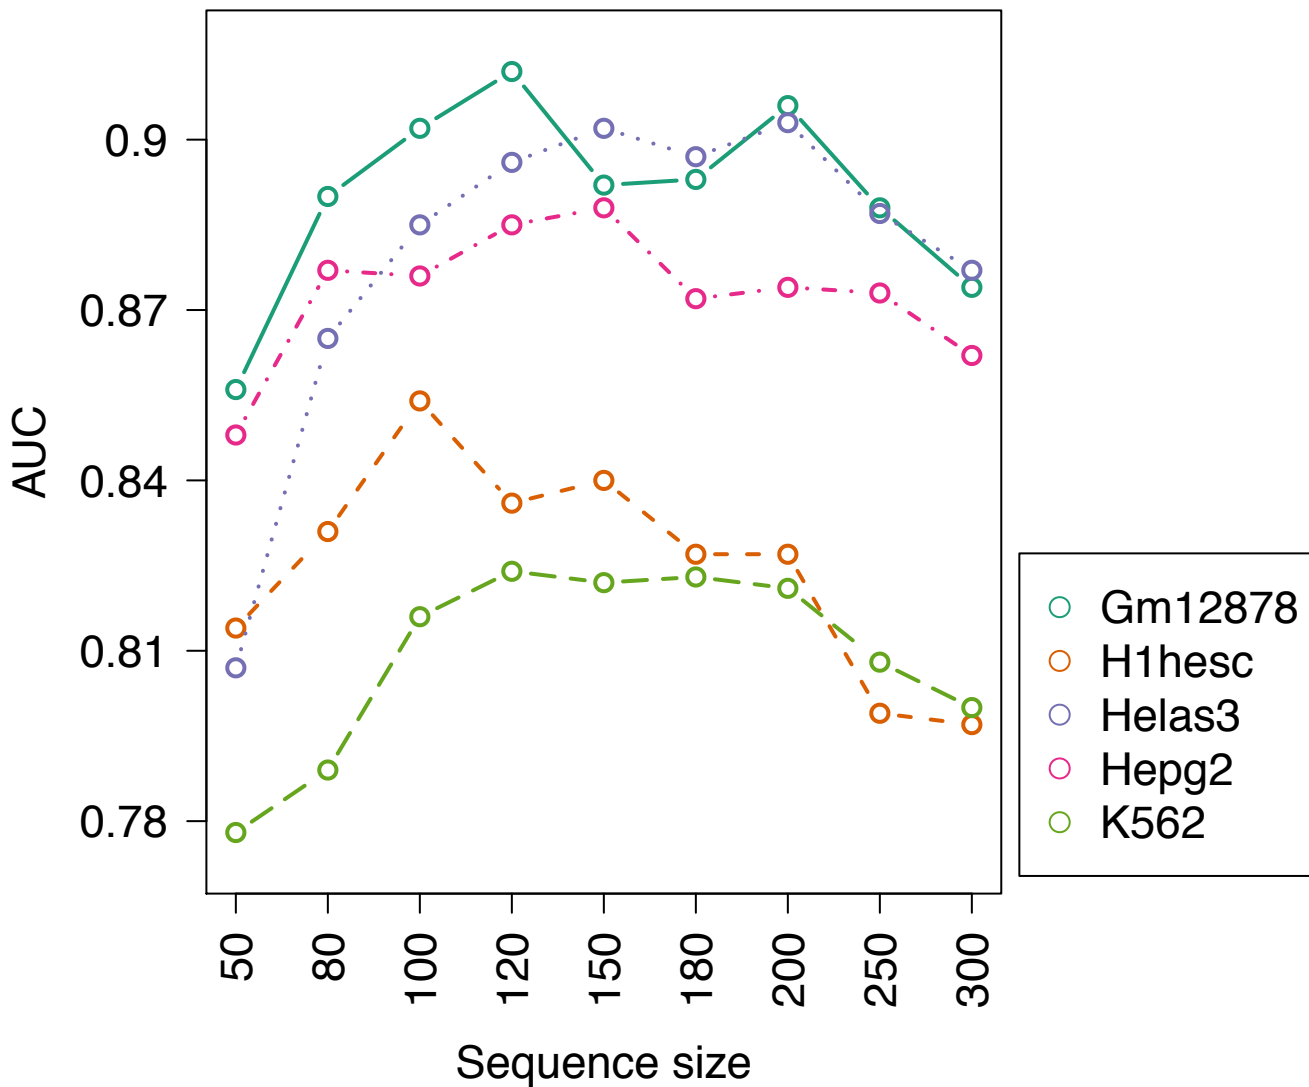

# SRF

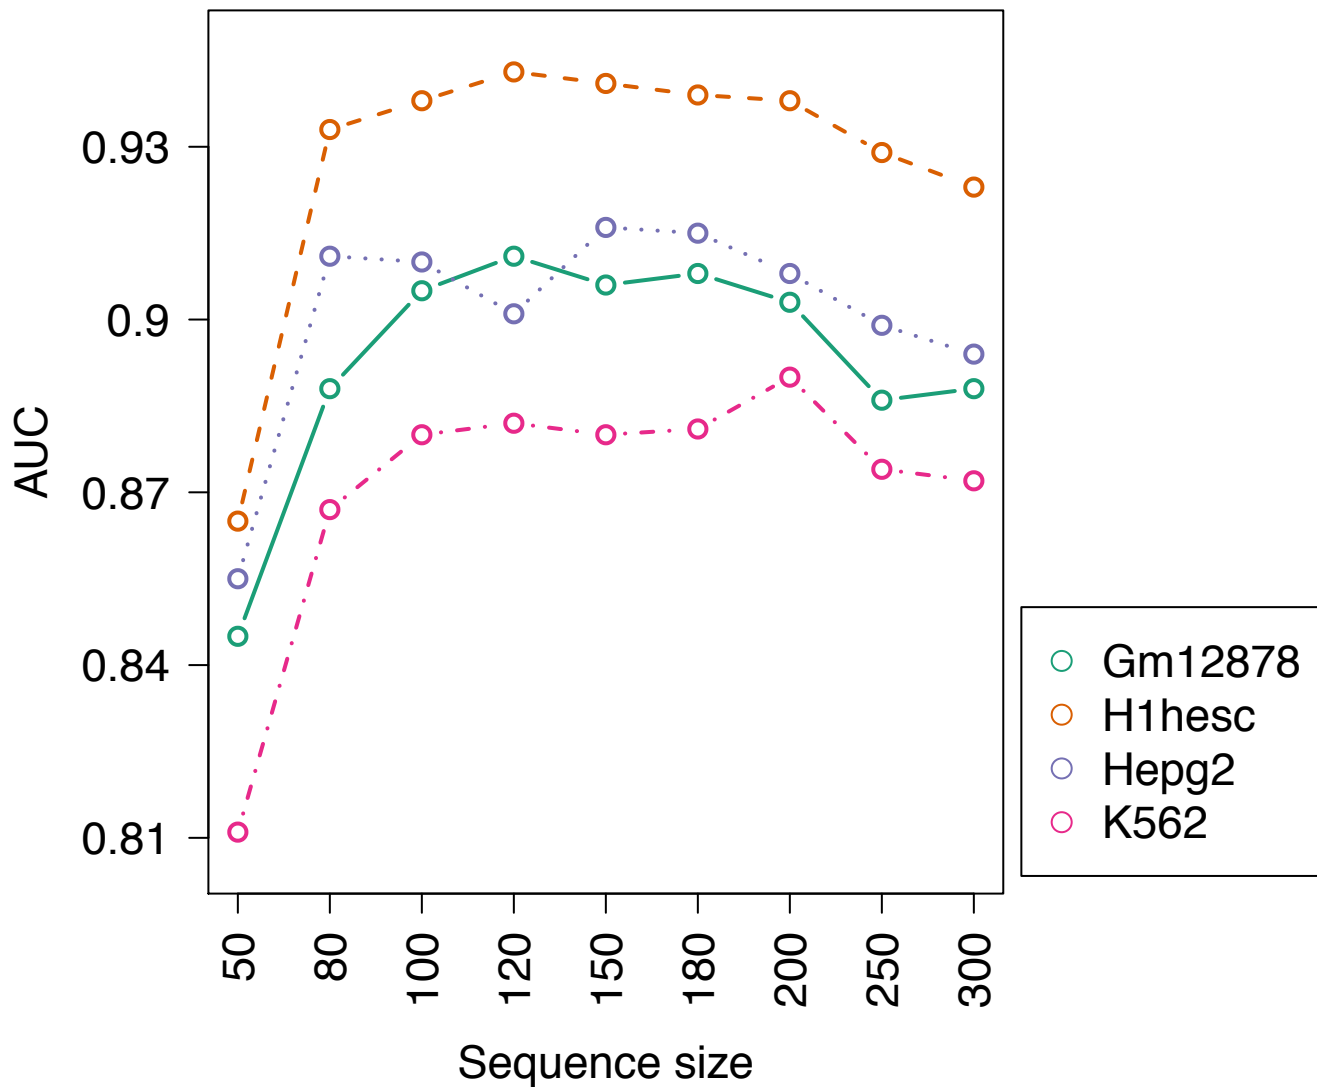

# TBP

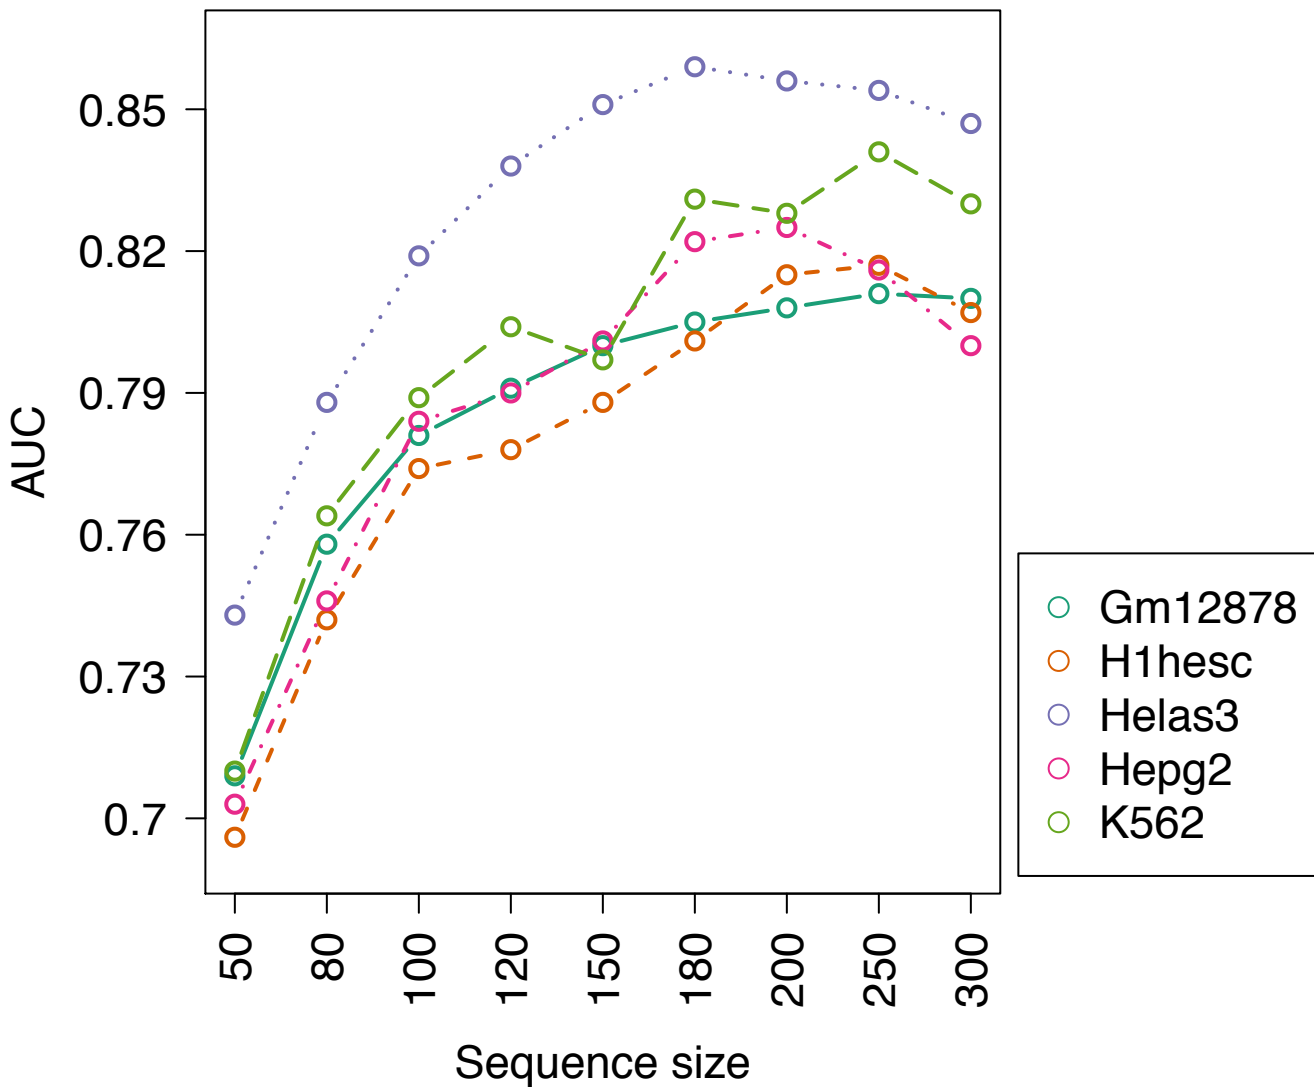

## TCF12

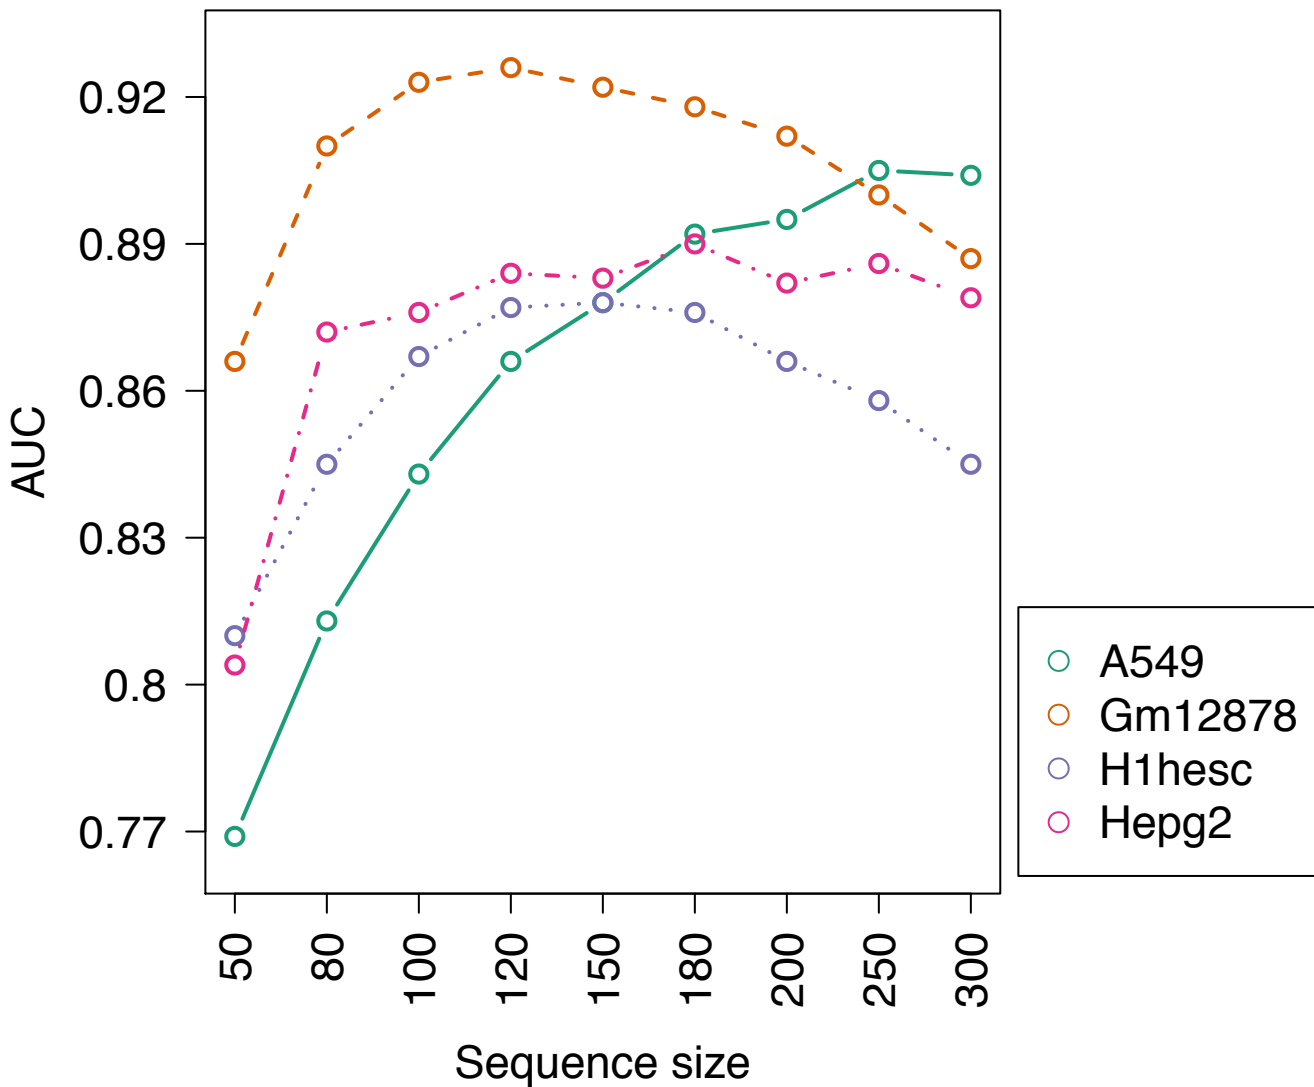

## TCF7L2

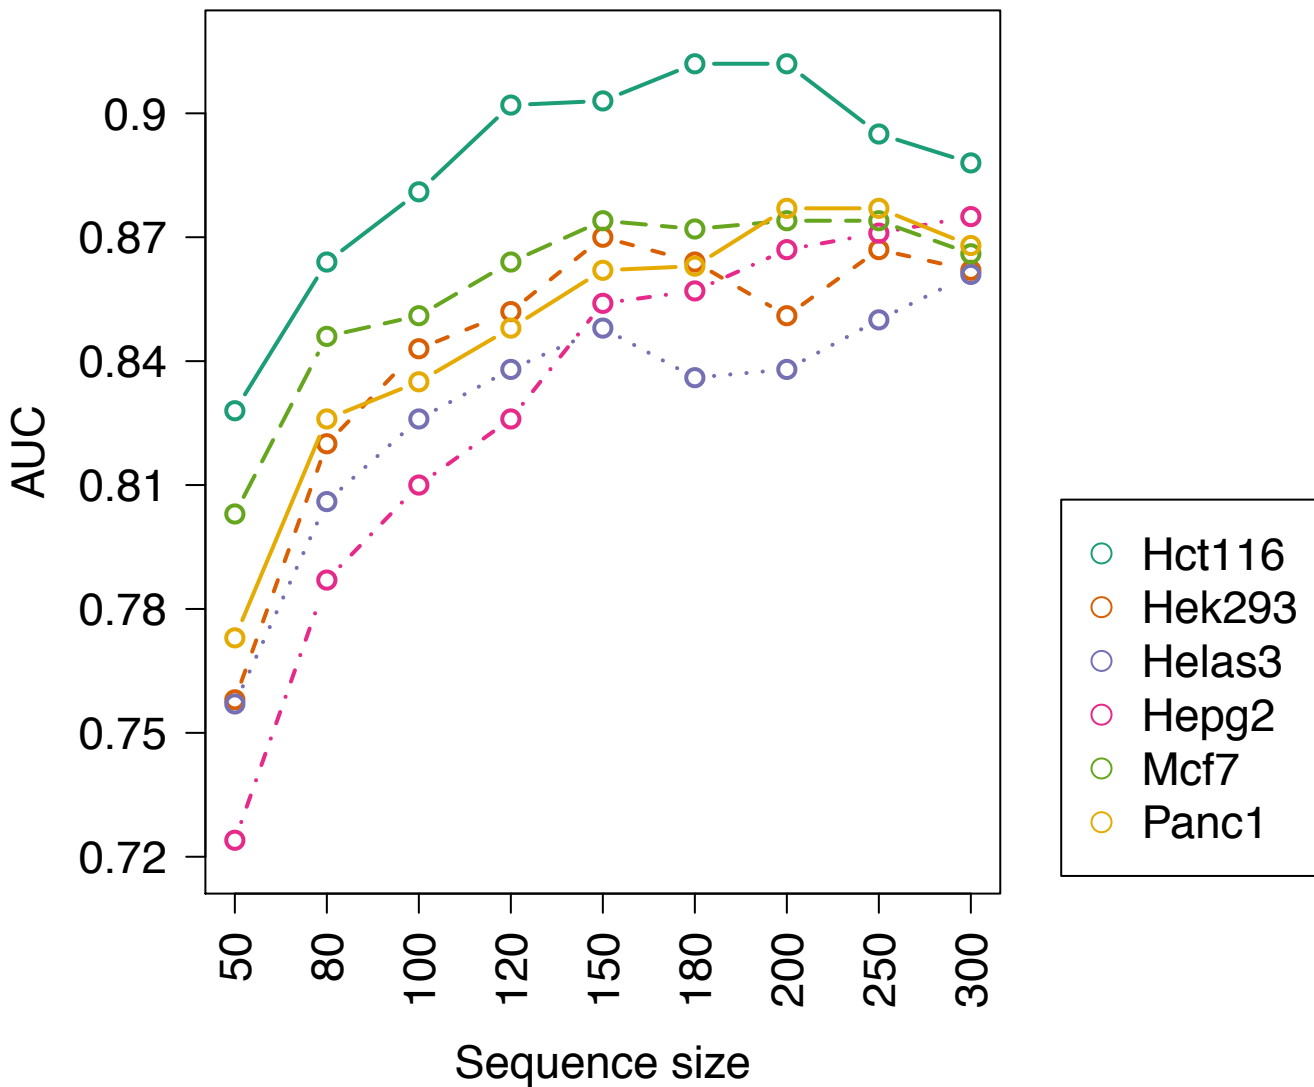

# USF1

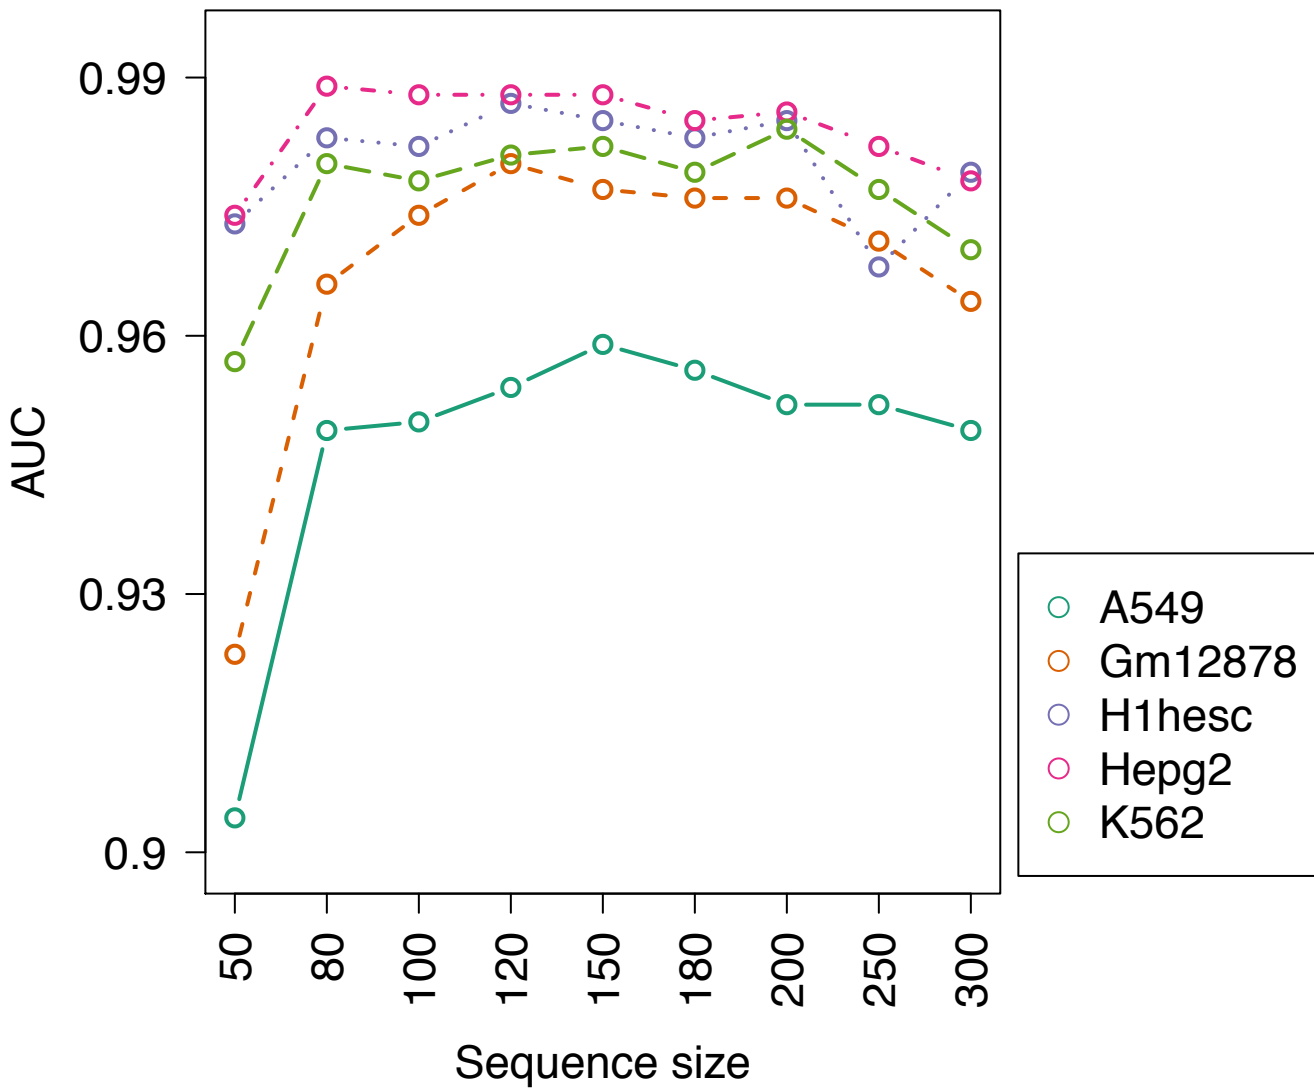

YY1

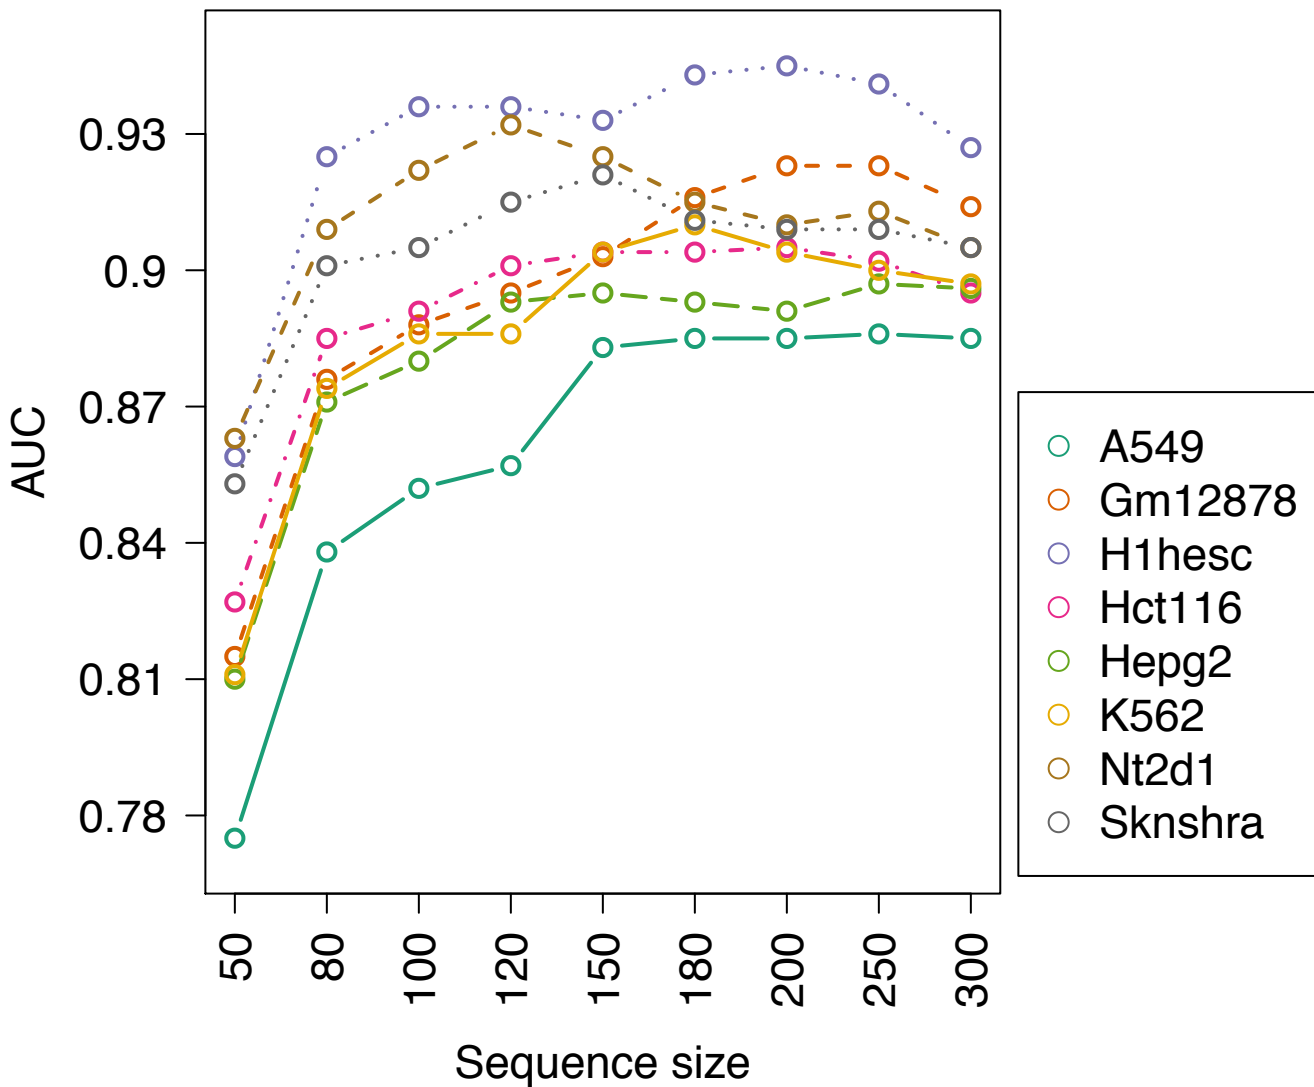

Supplement: Supplemental_Fig_S8.pdf [file Supplemental_Fig_S8.pdf]
