# Supplementary material for: Heterogeneity of transcription factor binding specificity models within and across cell lines
Source: HighWire-hosted journal article supplement (doi:10.1101/gr.199166.115), 2016-06-16
Supplement: Supplemental_Tables.xlsx [file Supplemental_Tables.xlsx]

## Sheet: S1-ChIP-seq
Supplementary Table 1: List of TF-cell pairs, the narrow peak file used for each pair, and size of training and testing sets after data processing.
TF	Cell line	File name	Training Size	Test Size
ATF3	A549	wgEncodeAwgTfbsHaibA549Atf3V0422111Etoh02UniPk.narrowPeak.gz	7499	2499
ATF3	H1hesc	wgEncodeAwgTfbsHaibH1hescAtf3V0416102UniPk.narrowPeak.gz	7172	2390
ATF3	Hepg2	wgEncodeAwgTfbsHaibHepg2Atf3V0416101UniPk.narrowPeak.gz	4914	1638
ATF3	K562	wgEncodeAwgTfbsHaibK562Atf3V0416101UniPk.narrowPeak.gz	7485	2495
BHLHE40	A549	wgEncodeAwgTfbsSydhA549Bhlhe40IggrabUniPk.narrowPeak.gz	4685	1561
BHLHE40	Gm12878	wgEncodeAwgTfbsSydhGm12878Bhlhe40cIggmusUniPk.narrowPeak.gz	7482	2494
BHLHE40	Hepg2	wgEncodeAwgTfbsHaibHepg2Bhlhe40V0416101UniPk.narrowPeak.gz	4256	1418
BHLHE40	K562	wgEncodeAwgTfbsSydhK562Bhlhe40nb100IggrabUniPk.narrowPeak.gz	7487	2495
CEBPB	A549	wgEncodeAwgTfbsSydhA549CebpbIggrabUniPk.narrowPeak	7500	2500
CEBPB	Gm12878	wgEncodeAwgTfbsHaibGm12878Cebpbsc150V0422111UniPk.narrowPeak	7500	2500
CEBPB	H1hesc	wgEncodeAwgTfbsSydhH1hescCebpbIggrabUniPk.narrowPeak	7500	2500
CEBPB	Helas3	wgEncodeAwgTfbsSydhHelas3CebpbIggrabUniPk.narrowPeak	7500	2500
CEBPB	Hepg2	wgEncodeAwgTfbsSydhHepg2CebpbIggrabUniPk.narrowPeak	7500	2500
CEBPB	Imr90	wgEncodeAwgTfbsSydhImr90CebpbIggrabUniPk.narrowPeak	7500	2500
CEBPB	K562	wgEncodeAwgTfbsSydhK562CebpbIggrabUniPk.narrowPeak	7500	2500
CTCF	A549	wgEncodeAwgTfbsUtaA549CtcfUniPk.narrowPeak.gz	6546	2182
CTCF	Gm12878	wgEncodeAwgTfbsBroadGm12878CtcfUniPk.narrowPeak.gz	6861	2287
CTCF	H1hesc	wgEncodeAwgTfbsBroadH1hescCtcfUniPk.narrowPeak.gz	6764	2254
CTCF	Hct116	wgEncodeAwgTfbsUwHct116CtcfUniPk.narrowPeak.gz	6596	2198
CTCF	Hek293	wgEncodeAwgTfbsUwHek293CtcfUniPk.narrowPeak.gz	6645	2215
CTCF	Helas3	wgEncodeAwgTfbsBroadHelas3CtcfUniPk.narrowPeak.gz	6749	2249
CTCF	Hepg2	wgEncodeAwgTfbsBroadHepg2CtcfUniPk.narrowPeak.gz	6884	2294
CTCF	Huvec	wgEncodeAwgTfbsBroadHuvecCtcfUniPk.narrowPeak.gz	6611	2203
CTCF	Imr90	wgEncodeAwgTfbsSydhImr90CtcfbIggrabUniPk.narrowPeak.gz	6987	2329
CTCF	K562	wgEncodeAwgTfbsBroadK562CtcfUniPk.narrowPeak.gz	6537	2179
CTCF	Mcf7	wgEncodeAwgTfbsUtaMcf7CtcfUniPk.narrowPeak.gz	6002	2000
CTCF	Sknshra	wgEncodeAwgTfbsHaibSknshraCtcfV0416102UniPk.narrowPeak.gz	6714	2238
EP300	A549	wgEncodeAwgTfbsHaibA549P300V0422111Etoh02UniPk.narrowPeak	7235	2411
EP300	Gm12878	wgEncodeAwgTfbsHaibGm12878P300Pcr1xUniPk.narrowPeak	7500	2500
EP300	H1hesc	wgEncodeAwgTfbsHaibH1hescP300V0416102UniPk.narrowPeak	7410	2470
EP300	Helas3	wgEncodeAwgTfbsSydhHelas3P300sc584sc584IggrabUniPk.narrowPeak	7500	2500
EP300	Hepg2	wgEncodeAwgTfbsHaibHepg2P300V0416101UniPk.narrowPeak	7473	2491
EP300	Sknsh	wgEncodeSydhTfbsSknshP300bIggrabPk.narrowPeak	7490	2496
EP300	T47d	wgEncodeAwgTfbsHaibT47dP300V0416102Dm002p1hUniPk.narrowPeak	7481	2493
FOS	Gm12878	wgEncodeAwgTfbsSydhGm12878CfosUniPk.narrowPeak	3359	1119
FOS	Helas3	wgEncodeAwgTfbsSydhHelas3CfosUniPk.narrowPeak	7500	2500
FOS	Huvec	wgEncodeAwgTfbsSydhHuvecCfosUcdUniPk.narrowPeak	7488	2496
FOS	K562	wgEncodeAwgTfbsSydhK562CfosUniPk.narrowPeak	7500	2500
FOS	Mcf10	wgEncodeAwgTfbsSydhMcf10aesCfosEtoh01HvdUniPk.narrowPeak	7497	2499
GABPA	A549	wgEncodeAwgTfbsHaibA549GabpV0422111Etoh02UniPk.narrowPeak	6039	2013
GABPA	Gm12878	wgEncodeAwgTfbsHaibGm12878GabpPcr2xUniPk.narrowPeak	7356	2452
GABPA	H1hesc	wgEncodeAwgTfbsHaibH1hescGabpPcr1xUniPk.narrowPeak	7326	2442
GABPA	Helas3	wgEncodeAwgTfbsHaibHelas3GabpPcr1xUniPk.narrowPeak	7499	2499
GABPA	Hepg2	wgEncodeAwgTfbsHaibHepg2GabpPcr2xUniPk.narrowPeak	7113	2371
GABPA	K562	wgEncodeAwgTfbsHaibK562GabpV0416101UniPk.narrowPeak	7476	2492
JUN	Gm12878	wgEncodeYaleChIPseqGm12878Cjun.narrowPeak	3123	1041
JUN	H1hesc	wgEncodeAwgTfbsSydhH1hescCjunIggrabUniPk.narrowPeak	3206	1068
JUN	Helas3	wgEncodeAwgTfbsSydhHelas3CjunIggrabUniPk.narrowPeak	7500	2500
JUN	Hepg2	wgEncodeAwgTfbsSydhHepg2CjunIggrabUniPk.narrowPeak	7500	2500
JUN	Huvec	wgEncodeAwgTfbsSydhHuvecCjunUniPk.narrowPeak	7500	2500
JUN	K562	wgEncodeAwgTfbsSydhK562CjunUniPk.narrowPeak	7469	2489
JUND	Gm12878	wgEncodeAwgTfbsSydhGm12878JundUniPk.narrowPeak	3668	1222
JUND	H1hesc	wgEncodeAwgTfbsHaibH1hescJundV0416102UniPk.narrowPeak	7470	2490
JUND	Helas3	wgEncodeAwgTfbsSydhHelas3JundIggrabUniPk.narrowPeak	7499	2499
JUND	Hepg2	wgEncodeAwgTfbsHaibHepg2JundPcr1xUniPk.narrowPeak	7494	2498
JUND	K562	wgEncodeAwgTfbsSydhK562JundIggrabUniPk.narrowPeak	7500	2500
JUND	Sknsh	wgEncodeSydhTfbsSknshJundIggrabPk.narrowPeak	7322	2440
MAFK	H1hesc	wgEncodeAwgTfbsSydhH1hescMafkIggrabUniPk.narrowPeak.gz	7499	2499
MAFK	Helas3	wgEncodeAwgTfbsSydhHelas3MafkIggrabUniPk.narrowPeak.gz	7500	2500
MAFK	Hepg2	wgEncodeAwgTfbsSydhHepg2Mafkab50322IggrabUniPk.narrowPeak.gz	7500	2500
MAFK	Imr90	wgEncodeAwgTfbsSydhImr90MafkIggrabUniPk.narrowPeak.gz	7500	2500
MAFK	K562	wgEncodeAwgTfbsSydhK562Mafkab50322IggrabUniPk.narrowPeak.gz	7500	2500
MAZ	Gm12878	wgEncodeAwgTfbsSydhGm12878Mazab85725IggmusUniPk.narrowPeak.gz	7106	2368
MAZ	Helas3	wgEncodeAwgTfbsSydhHelas3Mazab85725IggrabUniPk.narrowPeak.gz	6969	2323
MAZ	Hepg2	wgEncodeAwgTfbsSydhHepg2Mazab85725IggrabUniPk.narrowPeak.gz	6965	2321
MAZ	K562	wgEncodeAwgTfbsSydhK562Mazab85725IggrabUniPk.narrowPeak.gz	6888	2296
MXI1	Gm12878	wgEncodeAwgTfbsSydhGm12878Mxi1IggmusUniPk.narrowPeak.gz	7485	2495
MXI1	H1hesc	wgEncodeAwgTfbsSydhH1hescMxi1IggrabUniPk.narrowPeak.gz	7452	2484
MXI1	Helas3	wgEncodeAwgTfbsSydhHelas3Mxi1af4185IggrabUniPk.narrowPeak.gz	7373	2457
MXI1	Hepg2	wgEncodeAwgTfbsSydhHepg2Mxi1UniPk.narrowPeak.gz	7235	2411
MXI1	K562	wgEncodeAwgTfbsSydhK562Mxi1af4185IggrabUniPk.narrowPeak.gz	7500	2500
MYC	A549	wgEncodeSydhTfbsA549CmycIggrabPk.narrowPeak.gz	6269	2089
MYC	Gm12878	wgEncodeAwgTfbsUtaGm12878CmycUniPk.narrowPeak.gz	5207	1735
MYC	H1hesc	wgEncodeAwgTfbsSydhH1hescCmycIggrabUniPk.narrowPeak.gz	6762	2254
MYC	Helas3	wgEncodeAwgTfbsUtaHelas3CmycUniPk.narrowPeak.gz	4239	1413
MYC	Hepg2	wgEncodeAwgTfbsUtaHepg2CmycUniPk.narrowPeak.gz	6575	2191
MYC	Huvec	wgEncodeAwgTfbsUtaHuvecCmycUniPk.narrowPeak.gz	7440	2480
MYC	K562	wgEncodeAwgTfbsSydhK562CmycIggrabUniPk.narrowPeak.gz	7251	2417
MYC	Mcf7	wgEncodeAwgTfbsUtaMcf7CmycEstroUniPk.narrowPeak.gz	7353	2451
NRF1	Gm12878	wgEncodeAwgTfbsSydhGm12878Nrf1IggmusUniPk.narrowPeak.gz	7040	2346
NRF1	H1hesc	wgEncodeAwgTfbsSydhH1hescNrf1IggrabUniPk.narrowPeak.gz	6710	2236
NRF1	Helas3	wgEncodeAwgTfbsSydhHelas3Nrf1IggmusUniPk.narrowPeak.gz	4340	1446
NRF1	Hepg2	wgEncodeAwgTfbsSydhHepg2Nrf1IggrabUniPk.narrowPeak.gz	1232	410
NRF1	K562	wgEncodeAwgTfbsSydhK562Nrf1IggrabUniPk.narrowPeak.gz	6284	2094
REST	A549	wgEncodeAwgTfbsHaibA549NrsfV0422111Etoh02UniPk.narrowPeak	6068	2022
REST	Gm12878	wgEncodeAwgTfbsHaibGm12878NrsfPcr1xUniPk.narrowPeak	7224	2408
REST	H1hesc	wgEncodeAwgTfbsHaibH1hescNrsfV0416102UniPk.narrowPeak	7401	2467
REST	Helas3	wgEncodeAwgTfbsHaibHelas3NrsfPcr1xUniPk.narrowPeak	7464	2488
REST	Hepg2	wgEncodeAwgTfbsHaibHepg2NrsfPcr2xUniPk.narrowPeak	7094	2364
REST	K562	wgEncodeAwgTfbsHaibK562NrsfV0416102UniPk.narrowPeak	7425	2475
REST	Panc1	wgEncodeAwgTfbsHaibPanc1NrsfPcr2xUniPk.narrowPeak	7316	2438
REST	Pfsk1	wgEncodeAwgTfbsHaibPfsk1NrsfPcr2xUniPk.narrowPeak	7293	2431
REST	Sknsh	wgEncodeAwgTfbsHaibSknshNrsfPcr2xUniPk.narrowPeak	6936	2312
REST	U87	wgEncodeAwgTfbsHaibU87NrsfPcr2xUniPk.narrowPeak	6633	2211
RFX5	Gm12878	wgEncodeAwgTfbsSydhGm12878Rfx5200401194IggmusUniPk.narrowPeak.gz	3989	1329
RFX5	H1hesc	wgEncodeAwgTfbsSydhH1hescRfx5200401194IggrabUniPk.narrowPeak.gz	2520	840
RFX5	Helas3	wgEncodeAwgTfbsSydhHelas3Rfx5200401194IggrabUniPk.narrowPeak.gz	7500	2500
RFX5	Hepg2	wgEncodeAwgTfbsSydhHepg2Rfx5200401194IggrabUniPk.narrowPeak.gz	7500	2500
RFX5	K562	wgEncodeAwgTfbsSydhK562Rfx5IggrabUniPk.narrowPeak.gz	3285	1095
SRF	Gm12878	wgEncodeAwgTfbsHaibGm12878SrfPcr2xUniPk.narrowPeak	7499	2499
SRF	H1hesc	wgEncodeAwgTfbsHaibH1hescSrfPcr1xUniPk.narrowPeak	7461	2487
SRF	Hepg2	wgEncodeAwgTfbsHaibHepg2SrfV0416101UniPk.narrowPeak	7500	2500
SRF	K562	wgEncodeAwgTfbsHaibK562SrfV0416101UniPk.narrowPeak	7076	2358
TBP	Gm12878	wgEncodeAwgTfbsSydhGm12878TbpIggmusUniPk.narrowPeak.gz	7500	2500
TBP	H1hesc	wgEncodeAwgTfbsSydhH1hescTbpIggrabUniPk.narrowPeak.gz	7437	2479
TBP	Helas3	wgEncodeAwgTfbsSydhHelas3TbpIggrabUniPk.narrowPeak.gz	7500	2500
TBP	Hepg2	wgEncodeAwgTfbsSydhHepg2TbpIggrabUniPk.narrowPeak.gz	7473	2491
TBP	K562	wgEncodeAwgTfbsSydhK562TbpIggmusUniPk.narrowPeak.gz	7466	2488
TCF12	A549	wgEncodeAwgTfbsHaibA549Tcf12V0422111Etoh02UniPk.narrowPeak.gz	7302	2434
TCF12	Gm12878	wgEncodeAwgTfbsHaibGm12878Tcf12Pcr1xUniPk.narrowPeak.gz	7331	2443
TCF12	H1hesc	wgEncodeAwgTfbsHaibH1hescTcf12Pcr1xUniPk.narrowPeak.gz	7385	2461
TCF12	Hepg2	wgEncodeAwgTfbsHaibHepg2Tcf12Pcr1xUniPk.narrowPeak.gz	3092	1030
TCF7L2	Hct116	wgEncodeAwgTfbsSydhHct116Tcf7l2UcdUniPk.narrowPeak.gz	7457	2485
TCF7L2	Hek293	wgEncodeAwgTfbsSydhHek293Tcf7l2UcdUniPk.narrowPeak.gz	7500	2500
TCF7L2	Helas3	wgEncodeAwgTfbsSydhHelas3Tcf7l2UcdUniPk.narrowPeak.gz	4797	1599
TCF7L2	Hepg2	wgEncodeAwgTfbsSydhHepg2Tcf7l2UcdUniPk.narrowPeak.gz	4103	1367
TCF7L2	Mcf7	wgEncodeAwgTfbsSydhMcf7Tcf7l2UcdUniPk.narrowPeak.gz	7500	2500
TCF7L2	Panc1	wgEncodeAwgTfbsSydhPanc1Tcf7l2UcdUniPk.narrowPeak.gz	7500	2500
USF1	A549	wgEncodeAwgTfbsHaibA549Usf1Pcr1xDex100nmUniPk.narrowPeak	7500	2500
USF1	Gm12878	wgEncodeAwgTfbsHaibGm12878Usf1Pcr2xUniPk.narrowPeak	7452	2484
USF1	H1hesc	wgEncodeAwgTfbsHaibH1hescUsf1Pcr1xUniPk.narrowPeak	7500	2500
USF1	Hepg2	wgEncodeAwgTfbsHaibHepg2Usf1Pcr1xUniPk.narrowPeak	7497	2499
USF1	K562	wgEncodeAwgTfbsHaibK562Usf1V0416101UniPk.narrowPeak	7499	2499
YY1	A549	wgEncodeAwgTfbsHaibA549Yy1cV0422111Etoh02UniPk.narrowPeak	6248	2082
YY1	Gm12878	wgEncodeAwgTfbsHaibGm12878Yy1sc281Pcr1xUniPk.narrowPeak	7437	2479
YY1	H1hesc	wgEncodeAwgTfbsHaibH1hescYy1sc281V0416102UniPk.narrowPeak	7500	2500
YY1	Hct116	wgEncodeAwgTfbsHaibHct116Yy1sc281V0416101UniPk.narrowPeak	7494	2498
YY1	Hepg2	wgEncodeAwgTfbsHaibHepg2Yy1sc281V0416101UniPk.narrowPeak	7322	2440
YY1	K562	wgEncodeAwgTfbsHaibK562Yy1V0416101UniPk.narrowPeak	7430	2476
YY1	Sknshra	wgEncodeAwgTfbsHaibSknshraYy1sc281V0416102UniPk.narrowPeak	7292	2430
YY1	Nt2d1	wgEncodeAwgTfbsSydhNt2d1Yy1UcdUniPk.narrowPeak	7500	2500
ZNF143	Gm12878	wgEncodeAwgTfbsSydhGm12878Znf143166181apUniPk.narrowPeak.gz	7490	2496
ZNF143	H1hesc	wgEncodeAwgTfbsSydhH1hescZnf143IggrabUniPk.narrowPeak.gz	7454	2484
ZNF143	Helas3	wgEncodeAwgTfbsSydhHelas3Znf143IggrabUniPk.narrowPeak.gz	7490	2496
ZNF143	K562	wgEncodeAwgTfbsSydhK562Znf143IggrabUniPk.narrowPeak.gz	7428	2476

## Sheet: S2-TF Info
Supplementary Table 2: List of TFs, their corresponding TRANSFAC ids, and family name. Explanation of family name abbreviation is also included.
	General Information for the TFs
	# of motif ids	family name	PWMs		family name	Explanation
ATF3	3	bZIP, CH	M00513, M00801, M00981		bZIP	Basic Leucine Zipper Domain
BHLHE40	2	bHLH, bHLH-bZIP	M00997, M01034		bHLH	Basic Helix-Loop-Helix
CEBPB	4	bZIP	M00109, M00117, M00770, M00912		ETS	E26 transformation-specific
CTCF	2	CH	M01200, M01259		MADS	MADS box
EP300	1	-	M00033		HMG	High Mobility Group
FOS	5	bZIP	M00172, M00517, M00924, M00925, M00926		CH	C2H2 zinc finger
GABPA	3	ETS	M00341, M00971, M01660		unchar-DBD	Uncharacterized DNA Binding Domain
JUN	6	bZIP	M00041, M00172, M00517, M00924, M00925, M00926		Tata	TATA-box
JUND	4	bZIP	M00517, M00924, M00925, M00926		fork	fork head domain
MAFK	1	bZIP	M00517, M00924, M00925, M00926
MAZ	1	CH	M00649
MXI1	1	bHLH, bHLH-bZIP	M01034
MYC	8	bHLH, bHLH-bZIP	M00118, M00123, M00322, M00615, M00799, M01034, M01145, M01154
NRF1	1	bZIP, unchar-DBD	M00652
REST	4	CH	M00256, M00325, M01028, M01256
RFX5	1	fork, unchar-DBD	M00975
SRF	8	Mads	M00152, M00186, M00215, M00810, M00922, M01007, M01257, M01304
TBP	4	Tata	M00216, M00252, M00471, M00980
TCF12	3	bHLh	M00698, M00973, M01034
TCF7L2	2	HMG	M00671, M01705
USF1	6	bHLH, bHLH-bZIP	M00121, M00122, M00187, M00217, M00796, M01034
YY1	4	CH	M00059, M00069, M00793, M01035
ZNF143	2	CH	M00262, M00264

## Sheet: S3-EMT
Supplementary Table 3: Number of sub-models and performance of various EMT (Ensemble Model of TF).
		a) Number of submodels in each model									b) Area under ROC curve
TF	Cell	K-mer	K-merRC	Interaction (1k)	Interaction (2k)	Interaction (5k)	Interaction (10k)	NonInteraction	TF	Cell	K-mer	K-merRC	Interaction (1k)	Interaction (2k)	Interaction (5k)	Interaction (10k)	NonInteraction
ATF3	A549	31	38	32	34	32	27	30	ATF3	A549	0.782	0.805	0.822	0.826	0.817	0.804	0.568
ATF3	H1hesc	33	40	24	18	19	26	30	ATF3	H1hesc	0.886	0.907	0.923	0.922	0.925	0.927	0.68
ATF3	Hepg2	31	22	23	15	29	28	31	ATF3	Hepg2	0.9	0.898	0.919	0.918	0.925	0.925	0.692
ATF3	K562	28	30	29	14	28	25	26	ATF3	K562	0.926	0.945	0.956	0.931	0.954	0.943	0.684
BHLHE40	A549	30	31	18	31	27	23	29	BHLHE40	A549	0.903	0.902	0.899	0.898	0.888	0.869	0.744
BHLHE40	Gm12878	36	34	25	22	25	30	32	BHLHE40	Gm12878	0.918	0.929	0.918	0.908	0.903	0.882	0.729
BHLHE40	Hepg2	34	28	30	30	20	25	26	BHLHE40	Hepg2	0.918	0.925	0.937	0.933	0.932	0.908	0.752
BHLHE40	K562	31	31	26	26	29	28	23	BHLHE40	K562	0.916	0.926	0.92	0.917	0.912	0.898	0.732
CEBPB	A549	15	26	23	27	27	20	27	CEBPB	A549	0.909	0.944	0.981	0.979	0.975	0.955	0.962
CEBPB	Gm12878	47	41	26	29	39	36	28	CEBPB	Gm12878	0.773	0.794	0.787	0.778	0.781	0.758	0.539
CEBPB	H1hesc	40	26	29	29	26	28	28	CEBPB	H1hesc	0.958	0.959	0.982	0.985	0.979	0.968	0.974
CEBPB	Helas3	51	32	27	29	30	24	27	CEBPB	Helas3	0.927	0.928	0.964	0.964	0.951	0.932	0.915
CEBPB	Hepg2	14	28	18	22	21	26	47	CEBPB	Hepg2	0.925	0.963	0.981	0.983	0.979	0.968	0.968
CEBPB	Imr90	26	32	20	25	29	27	29	CEBPB	Imr90	0.924	0.953	0.98	0.977	0.974	0.949	0.957
CEBPB	K562	18	24	29	29	28	20	27	CEBPB	K562	0.919	0.94	0.98	0.977	0.975	0.957	0.956
CTCF	A549	30	26	18	29	29	29	9	CTCF	A549	0.913	0.91	0.97	0.976	0.968	0.959	0.966
CTCF	Gm12878	30	31	19	20	22	29	29	CTCF	Gm12878	0.909	0.925	0.966	0.972	0.968	0.949	0.96
CTCF	H1hesc	30	30	23	21	29	18	17	CTCF	H1hesc	0.897	0.917	0.963	0.961	0.959	0.941	0.958
CTCF	Hct116	27	30	17	29	29	29	24	CTCF	Hct116	0.906	0.926	0.962	0.969	0.967	0.952	0.965
CTCF	Hek293	29	27	26	29	29	30	24	CTCF	Hek293	0.902	0.919	0.973	0.977	0.974	0.953	0.962
CTCF	Helas3	30	27	19	20	29	30	25	CTCF	Helas3	0.914	0.921	0.962	0.963	0.954	0.934	0.956
CTCF	Hepg2	31	31	25	18	29	33	21	CTCF	Hepg2	0.898	0.916	0.967	0.969	0.958	0.94	0.959
CTCF	Huvec	32	29	19	29	29	29	12	CTCF	Huvec	0.913	0.923	0.965	0.969	0.963	0.949	0.961
CTCF	Imr90	25	28	18	18	29	30	27	CTCF	Imr90	0.89	0.916	0.966	0.97	0.963	0.946	0.965
CTCF	K562	31	23	29	19	29	30	26	CTCF	K562	0.89	0.886	0.949	0.949	0.943	0.93	0.943
CTCF	Mcf7	32	27	27	22	18	29	21	CTCF	Mcf7	0.908	0.917	0.969	0.964	0.962	0.952	0.965
CTCF	Sknshra	31	23	18	15	16	29	1	CTCF	Sknshra	0.924	0.921	0.975	0.98	0.971	0.965	0.972
EP300	A549	31	38	28	35	35	30	34	EP300	A549	0.816	0.85	0.854	0.859	0.848	0.818	0.501
EP300	Gm12878	42	41	32	30	37	34	33	EP300	Gm12878	0.802	0.824	0.815	0.807	0.799	0.787	0.511
EP300	H1hesc	48	42	34	33	27	27	31	EP300	H1hesc	0.78	0.796	0.801	0.802	0.793	0.779	0.507
EP300	Helas3	23	31	27	29	32	29	36	EP300	Helas3	0.853	0.894	0.925	0.918	0.904	0.875	0.493
EP300	Hepg2	39	34	21	24	33	30	36	EP300	Hepg2	0.87	0.872	0.896	0.895	0.893	0.875	0.512
EP300	Sknsh	44	42	38	35	36	36	34	EP300	Sknsh	0.715	0.729	0.693	0.693	0.677	0.652	0.513
EP300	T47d	45	42	27	37	35	36	35	EP300	T47d	0.832	0.848	0.815	0.814	0.794	0.768	0.518
FOS	Gm12878	29	29	29	19	29	29	34	FOS	Gm12878	0.945	0.949	0.965	0.956	0.951	0.936	0.559
FOS	Helas3	31	31	28	28	29	27	31	FOS	Helas3	0.954	0.96	0.968	0.968	0.962	0.936	0.901
FOS	Huvec	30	30	30	27	24	31	28	FOS	Huvec	0.972	0.972	0.974	0.974	0.962	0.934	0.949
FOS	K562	20	29	24	14	22	27	34	FOS	K562	0.964	0.971	0.974	0.97	0.968	0.967	0.741
FOS	Mcf10a	29	17	29	29	29	34	25	FOS	Mcf10a	0.976	0.975	0.979	0.981	0.977	0.96	0.969
GABPA	A549	29	33	15	28	18	32	27	GABPA	A549	0.887	0.909	0.89	0.9	0.885	0.883	0.791
GABPA	Gm12878	32	33	25	25	29	31	20	GABPA	Gm12878	0.88	0.887	0.884	0.883	0.883	0.874	0.829
GABPA	H1hesc	16	40	26	29	31	32	25	GABPA	H1hesc	0.811	0.86	0.892	0.889	0.886	0.874	0.726
GABPA	Helas3	29	28	19	24	31	27	29	GABPA	Helas3	0.922	0.925	0.925	0.927	0.928	0.915	0.88
GABPA	Hepg2	23	30	23	23	22	31	24	GABPA	Hepg2	0.912	0.927	0.921	0.922	0.916	0.907	0.87
GABPA	K562	28	26	28	28	27	30	26	GABPA	K562	0.926	0.928	0.931	0.924	0.922	0.915	0.844
JUN	Gm12878	29	35	31	33	31	32	23	JUN	Gm12878	0.742	0.757	0.732	0.732	0.718	0.677	0.634
JUN	H1hesc	27	34	15	28	29	32	20	JUN	H1hesc	0.857	0.875	0.88	0.88	0.874	0.862	0.782
JUN	Helas3	31	28	17	17	19	30	30	JUN	Helas3	0.958	0.959	0.961	0.956	0.95	0.934	0.937
JUN	Hepg2	31	31	25	15	25	28	24	JUN	Hepg2	0.961	0.972	0.977	0.975	0.974	0.963	0.91
JUN	Huvec	31	30	18	26	24	30	26	JUN	Huvec	0.963	0.97	0.966	0.969	0.96	0.942	0.917
JUN	K562	28	30	23	28	20	23	29	JUN	K562	0.964	0.972	0.977	0.977	0.97	0.967	0.937
JUND	Gm12878	24	31	30	23	30	31	31	JUND	Gm12878	0.91	0.928	0.909	0.901	0.888	0.844	0.811
JUND	H1hesc	28	40	27	30	31	27	27	JUND	H1hesc	0.779	0.809	0.799	0.811	0.806	0.803	0.666607
JUND	Helas3	26	1	25	20	25	15	28	JUND	Helas3	0.974	0.962	0.977	0.978	0.974	0.96	0.954
JUND	Hepg2	32	33	26	30	31	31	31	JUND	Hepg2	0.931	0.945	0.956	0.956	0.947	0.932	0.86
JUND	K562	31	30	27	19	29	29	24	JUND	K562	0.953	0.96	0.967	0.964	0.962	0.954	0.887
JUND	Sknsh	31	34	31	34	32	27	23	JUND	Sknsh	0.74	0.755	0.754	0.749	0.743	0.731	0.689
MAFK	H1hesc	27	31	24	29	30	30	27	MAFK	H1hesc	0.939	0.955	0.961	0.966	0.958	0.945	0.77
MAFK	Helas3	29	24	30	30	30	30	28	MAFK	Helas3	0.945	0.944	0.961	0.959	0.946	0.928	0.728
MAFK	Hepg2	30	14	27	27	17	13	24	MAFK	Hepg2	0.961	0.953	0.969	0.971	0.959	0.931	0.719
MAFK	Imr90	29	29	25	28	29	30	48	MAFK	Imr90	0.97	0.976	0.979	0.977	0.966	0.946	0.721
MAFK	K562	33	24	29	27	19	30	6	MAFK	K562	0.936	0.939	0.959	0.954	0.937	0.93	0.761
MAZ	Gm12878	45	39	31	40	36	33	34	MAZ	Gm12878	0.8	0.808	0.801	0.815	0.806	0.791	0.626
MAZ	Helas3	48	37	36	36	37	35	31	MAZ	Helas3	0.79	0.797	0.821	0.822	0.816	0.81	0.613
MAZ	Hepg2	44	43	33	30	37	31	34	MAZ	Hepg2	0.794	0.802	0.815	0.816	0.816	0.804	0.636
MAZ	K562	41	52	31	31	31	24	31	MAZ	K562	0.799	0.827	0.844	0.841	0.844	0.826	0.613
MXI1	Gm12878	35	32	30	28	32	26	37	MXI1	Gm12878	0.825	0.832	0.837	0.827	0.833	0.813	0.582
MXI1	H1hesc	36	38	31	25	34	26	38	MXI1	H1hesc	0.818	0.829	0.828	0.825	0.822	0.808	0.622
MXI1	Helas3	34	36	29	31	36	24	34	MXI1	Helas3	0.862	0.872	0.87	0.872	0.862	0.838	0.616
MXI1	Hepg2	32	36	25	23	28	29	32	MXI1	Hepg2	0.86	0.882	0.859	0.851	0.853	0.838	0.599
MXI1	K562	37	31	29	31	34	32	28	MXI1	K562	0.849	0.848	0.86	0.858	0.847	0.84	0.596
MYC	A549	32	30	32	35	32	29	28	MYC	A549	0.716	0.735	0.731	0.734	0.734	0.715	0.628
MYC	Gm12878	37	36	34	26	21	31	26	MYC	Gm12878	0.749	0.764	0.745	0.724	0.7	0.699	0.686
MYC	H1hesc	35	36	30	32	28	26	19	MYC	H1hesc	0.818	0.837	0.84	0.847	0.84	0.817	0.758
MYC	Helas3	36	36	27	31	33	30	28	MYC	Helas3	0.836	0.856	0.856	0.865	0.846	0.825	0.781
MYC	Hepg2	36	36	36	30	34	30	26	MYC	Hepg2	0.843	0.856	0.847	0.853	0.833	0.814	0.789
MYC	Huvec	36	35	24	35	34	32	23	MYC	Huvec	0.876	0.885	0.864	0.874	0.862	0.851	0.756
MYC	K562	33	35	28	31	32	27	28	MYC	K562	0.879	0.889	0.888	0.889	0.877	0.857	0.83
MYC	Mcf7	34	32	36	36	33	30	24	MYC	Mcf7	0.857	0.864	0.851	0.845	0.823	0.81	0.781
NRF1	Gm12878	30	26	27	29	32	25	28	NRF1	Gm12878	0.941	0.943	0.923	0.94	0.937	0.921	0.88
NRF1	H1hesc	31	27	30	30	30	30	28	NRF1	H1hesc	0.944	0.952	0.937	0.944	0.939	0.932	0.884
NRF1	Helas3	31	13	18	29	30	30	22	NRF1	Helas3	0.948	0.943	0.937	0.944	0.948	0.942	0.894
NRF1	Hepg2	28	28	19	10	29	24	25	NRF1	Hepg2	0.971	0.982	0.967	0.981	0.973	0.977	0.951
NRF1	K562	31	23	24	29	23	31	28	NRF1	K562	0.938	0.934	0.937	0.944	0.926	0.911	0.889
REST	A549	40	37	28	28	32	33	23	REST	A549	0.849	0.862	0.879	0.876	0.871	0.85	0.723
REST	Gm12878	24	24	25	31	24	30	29	REST	Gm12878	0.909	0.92	0.92	0.924	0.912	0.876	0.856
REST	H1hesc	31	24	24	22	28	30	25	REST	H1hesc	0.965	0.965	0.967	0.964	0.961	0.926	0.911
REST	Helas3	28	30	24	19	27	30	26	REST	Helas3	0.955	0.968	0.961	0.959	0.947	0.916	0.888
REST	Hepg2	39	38	32	27	32	32	27	REST	Hepg2	0.883	0.894	0.886	0.887	0.88	0.867	0.821
REST	K562	32	31	26	22	30	31	28	REST	K562	0.917	0.927	0.933	0.929	0.924	0.89	0.8
REST	Panc1	36	32	26	23	31	32	30	REST	Panc1	0.873	0.882	0.891	0.894	0.887	0.881	0.815
REST	Pfsk1	32	19	28	21	30	25	17	REST	Pfsk1	0.931	0.923	0.938	0.934	0.928	0.902	0.868
REST	Sknsh	47	48	26	28	29	34	30	REST	Sknsh	0.847	0.868	0.86	0.858	0.84	0.835	0.687
REST	U87	40	35	27	28	29	32	19	REST	U87	0.867	0.879	0.893	0.896	0.895	0.885	0.748
RFX5	Gm12878	25	31	29	32	31	32	31	RFX5	Gm12878	0.861	0.881	0.892	0.892	0.885	0.863	0.581
RFX5	H1hesc	25	23	26	31	30	30	35	RFX5	H1hesc	0.83	0.823	0.852	0.86	0.841	0.839	0.651
RFX5	Helas3	28	35	23	23	31	29	31	RFX5	Helas3	0.816	0.839	0.873	0.875	0.879	0.865	0.58
RFX5	Hepg2	22	31	23	30	31	29	33	RFX5	Hepg2	0.834	0.865	0.864	0.874	0.859	0.848	0.606
RFX5	K562	26	32	31	30	30	23	33	RFX5	K562	0.784	0.803	0.815	0.805	0.809	0.795	0.559
SRF	Gm12878	33	27	19	15	15	24	22	SRF	Gm12878	0.835	0.838	0.893	0.889	0.886	0.882	0.734
SRF	H1hesc	30	32	26	26	29	26	28	SRF	H1hesc	0.875	0.894	0.933	0.934	0.935	0.928	0.814
SRF	Hepg2	35	34	26	26	27	28	17	SRF	Hepg2	0.844	0.855	0.923	0.923	0.911	0.902	0.839
SRF	K562	26	39	24	28	24	32	19	SRF	K562	0.823	0.848	0.873	0.879	0.876	0.876	0.676
TBP	Gm12878	50	48	36	34	37	30	32	TBP	Gm12878	0.749	0.768	0.753	0.753	0.74	0.708	0.572
TBP	H1hesc	47	36	35	36	34	32	28	TBP	H1hesc	0.745	0.758	0.74	0.742	0.733	0.711	0.569
TBP	Helas3	40	39	31	31	33	29	32	TBP	Helas3	0.764	0.773	0.776	0.782	0.768	0.745	0.565
TBP	Hepg2	45	45	39	39	31	36	31	TBP	Hepg2	0.759	0.765	0.765	0.757	0.731	0.715	0.577
TBP	K562	42	42	38	36	36	31	31	TBP	K562	0.765	0.779	0.768	0.759	0.753	0.739	0.543
TCF12	A549	35	35	37	34	35	30	51	TCF12	A549	0.819	0.831	0.848	0.848	0.832	0.807	0.544
TCF12	Gm12878	34	29	25	19	32	31	26	TCF12	Gm12878	0.914	0.916	0.928	0.915	0.915	0.902	0.853
TCF12	H1hesc	48	30	31	33	31	29	31	TCF12	H1hesc	0.859	0.856	0.872	0.874	0.864	0.844	0.779
TCF12	Hepg2	37	37	25	14	31	31	71	TCF12	Hepg2	0.813	0.818	0.849	0.822	0.832	0.814	0.554
TCF7L2	Hct116	30	34	22	33	33	33	25	TCF7L2	Hct116	0.86	0.874	0.874	0.876	0.868	0.843	0.778
TCF7L2	Hek293	40	37	25	37	37	36	31	TCF7L2	Hek293	0.822	0.833	0.828	0.841	0.82	0.802	0.735
TCF7L2	Helas3	35	31	29	26	30	29	19	TCF7L2	Helas3	0.784	0.81	0.823	0.813	0.798	0.786	0.766
TCF7L2	Hepg2	27	31	24	32	35	31	24	TCF7L2	Hepg2	0.783	0.801	0.805	0.813	0.792	0.767	0.754
TCF7L2	Mcf7	32	34	34	33	37	33	29	TCF7L2	Mcf7	0.822	0.833	0.854	0.846	0.825	0.8	0.764
TCF7L2	Panc1	38	38	32	36	32	34	32	TCF7L2	Panc1	0.804	0.821	0.813	0.817	0.804	0.778	0.725
USF1	A549	30	30	27	27	27	28	26	USF1	A549	0.942	0.947	0.957	0.957	0.953	0.943	0.915
USF1	Gm12878	30	26	26	24	27	28	29	USF1	Gm12878	0.97	0.969	0.97	0.969	0.966	0.965	0.957
USF1	H1hesc	13	28	25	29	17	62	20	USF1	H1hesc	0.974	0.984	0.985	0.981	0.979	0.978	0.972
USF1	Hepg2	18	25	28	28	28	27	23	USF1	Hepg2	0.975	0.985	0.987	0.986	0.985	0.977	0.979
USF1	K562	30	26	24	28	28	23	25	USF1	K562	0.98	0.98	0.984	0.981	0.981	0.97	0.971
YY1	A549	26	33	34	30	31	27	20	YY1	A549	0.857	0.873	0.866	0.858	0.849	0.831	0.811
YY1	Gm12878	31	30	30	33	32	31	32	YY1	Gm12878	0.885	0.893	0.891	0.889	0.885	0.869	0.83
YY1	H1hesc	29	30	23	24	24	25	30	YY1	H1hesc	0.932	0.935	0.935	0.928	0.925	0.909	0.897
YY1	Hct116	29	33	32	33	31	26	28	YY1	Hct116	0.868	0.882	0.889	0.889	0.885	0.873	0.807
YY1	Hepg2	32	31	34	24	33	21	31	YY1	Hepg2	0.877	0.883	0.875	0.862	0.869	0.846	0.811
YY1	K562	31	32	27	27	31	28	31	YY1	K562	0.876	0.886	0.874	0.875	0.875	0.858	0.818
YY1	Nt2d1	29	28	32	22	31	32	23	YY1	Nt2d1	0.921	0.927	0.926	0.915	0.912	0.906	0.878
YY1	Sknshra	31	32	28	28	19	30	29	YY1	Sknshra	0.908	0.913	0.909	0.906	0.889	0.875	0.869
ZNF143	Gm12878	29	31	31	29	31	30	28	ZNF143	Gm12878	0.835	0.856	0.904	0.915	0.901	0.892	0.673
ZNF143	H1hesc	51	53	17	32	31	32	25	ZNF143	H1hesc	0.847	0.875	0.883	0.904	0.899	0.893	0.678
ZNF143	Helas3	49	52	29	32	17	32	28	ZNF143	Helas3	0.818	0.829	0.846	0.86	0.845	0.851	0.644
ZNF143	K562	30	31	31	27	25	31	29	ZNF143	K562	0.831	0.861	0.899	0.9	0.903	0.896	0.667

## Sheet: S4-SVM
Supplementary Table 4: Comparison of EMT (Ensemble Model of TF) with kmer-SVM (K-mer based Support Vector Machine).
TF	Cell	K-mer	K-merRC	Interaction	kmer-SVM
ATF3	A549	0.782	0.805	0.822	0.801
ATF3	H1hesc	0.886	0.907	0.923	0.9071
ATF3	Hepg2	0.9	0.898	0.919	0.90964
ATF3	K562	0.926	0.945	0.956	0.94396
BHLHE40	A549	0.903	0.902	0.899	0.8959
BHLHE40	Gm12878	0.918	0.929	0.918	0.92396
BHLHE40	Hepg2	0.918	0.925	0.937	0.93705
BHLHE40	K562	0.916	0.926	0.92	0.92118
CEBPB	A549	0.909	0.944	0.981	0.95552
CEBPB	Gm12878	0.773	0.794	0.787	0.77789
CEBPB	H1hesc	0.958	0.959	0.982	0.96755
CEBPB	Helas3	0.927	0.928	0.964	0.93825
CEBPB	Hepg2	0.925	0.963	0.981	0.96755
CEBPB	Imr90	0.924	0.953	0.98	0.96007
CEBPB	K562	0.919	0.94	0.98	0.95877
CTCF	A549	0.913	0.91	0.97	0.94506
CTCF	Gm12878	0.909	0.925	0.966	0.94137
CTCF	H1hesc	0.897	0.917	0.963	0.94157
CTCF	Hct116	0.906	0.926	0.962	0.9477
CTCF	Hek293	0.902	0.919	0.973	0.94231
CTCF	Helas3	0.914	0.921	0.962	0.94072
CTCF	Hepg2	0.898	0.916	0.967	0.9341
CTCF	Huvec	0.913	0.923	0.965	0.94581
CTCF	Imr90	0.89	0.916	0.966	0.94482
CTCF	K562	0.89	0.886	0.949	0.92482
CTCF	Mcf7	0.908	0.917	0.969	0.94226
CTCF	Sknshra	0.924	0.921	0.975	0.95506
EP300	A549	0.816	0.85	0.854	0.84548
EP300	Gm12878	0.802	0.824	0.815	0.80824
EP300	H1hesc	0.78	0.796	0.801	0.79218
EP300	Helas3	0.853	0.894	0.925	0.91426
EP300	Hepg2	0.87	0.872	0.896	0.89435
EP300	Sknsh	0.715	0.729	0.693	0.71313
EP300	T47d	0.832	0.848	0.815	0.83198
FOS	Gm12878	0.945	0.949	0.965	0.96168
FOS	Helas3	0.954	0.96	0.968	0.96363
FOS	Huvec	0.972	0.972	0.974	0.97585
FOS	K562	0.964	0.971	0.974	0.97706
FOS	Mcf10a	0.976	0.975	0.979	0.97993
GABPA	A549	0.887	0.909	0.89	0.89965
GABPA	Gm12878	0.88	0.887	0.884	0.88956
GABPA	H1hesc	0.811	0.86	0.892	0.85866
GABPA	Helas3	0.922	0.925	0.925	0.93072
GABPA	Hepg2	0.912	0.927	0.921	0.93329
GABPA	K562	0.926	0.928	0.931	0.93046
JUN	Gm12878	0.742	0.757	0.732	0.73685
JUN	H1hesc	0.857	0.875	0.88	0.87099
JUN	Helas3	0.958	0.959	0.961	0.96571
JUN	Hepg2	0.961	0.972	0.977	0.974
JUN	Huvec	0.963	0.97	0.966	0.97747
JUN	K562	0.964	0.972	0.977	0.97467
JUND	Gm12878	0.91	0.928	0.909	0.94775
JUND	H1hesc	0.779	0.809	0.799	0.80176
JUND	Helas3	0.974	0.962	0.977	0.97992
JUND	Hepg2	0.931	0.945	0.956	0.93706
JUND	K562	0.953	0.96	0.967	0.95435
JUND	Sknsh	0.74	0.755	0.754	0.73772
MAFK	H1hesc	0.939	0.955	0.961	0.95786
MAFK	Helas3	0.945	0.944	0.961	0.95923
MAFK	Hepg2	0.961	0.953	0.969	0.97455
MAFK	Imr90	0.97	0.976	0.979	0.97966
MAFK	K562	0.936	0.939	0.959	0.94744
MAZ	Gm12878	0.8	0.808	0.801	0.79965
MAZ	Helas3	0.79	0.797	0.821	0.80649
MAZ	Hepg2	0.794	0.802	0.815	0.7999
MAZ	K562	0.799	0.827	0.844	0.8325
MXI1	Gm12878	0.825	0.832	0.837	0.82732
MXI1	H1hesc	0.818	0.829	0.828	0.82986
MXI1	Helas3	0.862	0.872	0.87	0.86293
MXI1	Hepg2	0.86	0.882	0.859	0.87194
MXI1	K562	0.849	0.848	0.86	0.86257
MYC	A549	0.716	0.735	0.731	0.696
MYC	Gm12878	0.749	0.764	0.745	0.73332
MYC	H1hesc	0.818	0.837	0.84	0.83489
MYC	Helas3	0.836	0.856	0.856	0.85502
MYC	Hepg2	0.843	0.856	0.847	0.84364
MYC	Huvec	0.876	0.885	0.864	0.8778
MYC	K562	0.879	0.889	0.888	0.89012
MYC	Mcf7	0.857	0.864	0.851	0.84497
NRF1	Gm12878	0.941	0.943	0.923	0.95091
NRF1	H1hesc	0.944	0.952	0.937	0.94421
NRF1	Helas3	0.948	0.943	0.937	0.93408
NRF1	Hepg2	0.971	0.982	0.967	0.98836
NRF1	K562	0.938	0.934	0.937	0.93763
REST	A549	0.849	0.862	0.879	0.86616
REST	Gm12878	0.909	0.92	0.92	0.89486
REST	H1hesc	0.965	0.965	0.967	0.98042
REST	Helas3	0.955	0.968	0.961	0.9768
REST	Hepg2	0.883	0.894	0.886	0.88961
REST	K562	0.917	0.927	0.933	0.93016
REST	Panc1	0.873	0.882	0.891	0.89596
REST	Pfsk1	0.931	0.923	0.938	0.94086
REST	Sknsh	0.847	0.868	0.86	0.84007
REST	U87	0.867	0.879	0.893	0.88548
RFX5	Gm12878	0.861	0.881	0.892	0.89418
RFX5	H1hesc	0.83	0.823	0.852	0.85497
RFX5	Helas3	0.816	0.839	0.873	0.85754
RFX5	Hepg2	0.834	0.865	0.864	0.87399
RFX5	K562	0.784	0.803	0.815	0.81955
SRF	Gm12878	0.835	0.838	0.893	0.86104
SRF	H1hesc	0.875	0.894	0.933	0.89342
SRF	Hepg2	0.844	0.855	0.923	0.86992
SRF	K562	0.823	0.848	0.873	0.84476
TBP	Gm12878	0.749	0.768	0.753	0.73877
TBP	H1hesc	0.745	0.758	0.74	0.74862
TBP	Helas3	0.764	0.773	0.776	0.76458
TBP	Hepg2	0.759	0.765	0.765	0.71276
TBP	K562	0.765	0.779	0.768	0.75216
TCF12	A549	0.819	0.831	0.848	0.83054
TCF12	Gm12878	0.914	0.916	0.928	0.92378
TCF12	H1hesc	0.859	0.856	0.872	0.87401
TCF12	Hepg2	0.813	0.818	0.849	0.80706
TCF7L2	Hct116	0.86	0.874	0.874	0.877
TCF7L2	Hek293	0.822	0.833	0.828	0.82831
TCF7L2	Helas3	0.784	0.81	0.823	0.80642
TCF7L2	Hepg2	0.783	0.801	0.805	0.80557
TCF7L2	Mcf7	0.822	0.833	0.854	0.8571
TCF7L2	Panc1	0.804	0.821	0.813	0.81976
USF1	A549	0.942	0.947	0.957	0.9506
USF1	Gm12878	0.97	0.969	0.97	0.97215
USF1	H1hesc	0.974	0.984	0.985	0.986
USF1	Hepg2	0.975	0.985	0.987	0.98286
USF1	K562	0.98	0.98	0.984	0.98254
YY1	A549	0.857	0.873	0.866	0.86646
YY1	Gm12878	0.885	0.893	0.891	0.8923
YY1	H1hesc	0.932	0.935	0.935	0.93963
YY1	Hct116	0.868	0.882	0.889	0.88597
YY1	Hepg2	0.877	0.883	0.875	0.88721
YY1	K562	0.876	0.886	0.874	0.88497
YY1	Nt2d1	0.921	0.927	0.926	0.92688
YY1	Sknshra	0.908	0.913	0.909	0.91884
ZNF143	Gm12878	0.835	0.856	0.904	0.88477
ZNF143	H1hesc	0.847	0.875	0.883	0.87141
ZNF143	Helas3	0.818	0.829	0.846	0.82081
ZNF143	K562	0.831	0.861	0.899	0.88875

## Sheet: S5-RNAseq
Supplementary Table 5: List of RNASeq files for various cell lines obtained from ENCODE to measure log fold change (logFC) of the gene expression. Explanation of cell line is also included.
Filename	Cell line					Cell lines	Explanation
wgEncodeCshlLongRnaSeqA549CellLongnonpolyaAlnRep1.bam	A549					A549	Epitheliam cancer
wgEncodeCshlLongRnaSeqA549CellLongnonpolyaAlnRep2.bam						Gm12878	Blood normal
wgEncodeCshlLongRnaSeqA549CellPapAlnRep1.bam						H1hesc	Stem cell normal
wgEncodeCshlLongRnaSeqA549CellPapAlnRep2.bam						Hct116	Colorectal cancer
wgEncodeCshlLongRnaSeqGm12878CellLongnonpolyaAlnRep1.bam	Gm12878					Hek293	kidney
wgEncodeCshlLongRnaSeqGm12878CellLongnonpolyaAlnRep2.bam						Helas3	Cervical cancer
wgEncodeCshlLongRnaSeqGm12878CellPapAlnRep1.bam						Hepg2	Liver tumor
wgEncodeCshlLongRnaSeqGm12878CellPapAlnRep2.bam						Huvec	Blood vessel normal
wgEncodeCshlLongRnaSeqH1hescCellLongnonpolyaAlnRep1.bam	H1hesc					Imr90	Lung normal
wgEncodeCshlLongRnaSeqH1hescCellLongnonpolyaAlnRep2.bam						K562	Blood cancer
wgEncodeCshlLongRnaSeqH1hescCellPapAlnRep1.bam						Mcf7	Breast tumor
wgEncodeCshlLongRnaSeqH1hescCellPapAlnRep2.bam						Mcf10a	Breast
wgEncodeCaltechRnaSeqHct116R2x75Il200AlignsRep1V2.bam	Hct116					Nt2d1	Testis cancer
wgEncodeCaltechRnaSeqHct116R2x75Il200AlignsRep2V2.bam						Panc1	Pancreas cancer
wgEncodeCshlLongRnaSeqHelas3CellLongnonpolyaAlnRep1.bam	Helas3					Pfsk1	Nuroectodermal cancer
wgEncodeCshlLongRnaSeqHelas3CellLongnonpolyaAlnRep2.bam						Sknsh/Sknshra	Brain cancer
wgEncodeCshlLongRnaSeqHelas3CellPapAlnRep1.bam						T47d	Duct cancer
wgEncodeCshlLongRnaSeqHelas3CellPapAlnRep2.bam						U87	Gliblastoma cancer
wgEncodeCshlLongRnaSeqHepg2CellLongnonpolyaAlnRep1.bam	Hepg2
wgEncodeCshlLongRnaSeqHepg2CellLongnonpolyaAlnRep2.bam						*Note: Highlighted cells have no samples
wgEncodeCshlLongRnaSeqHepg2CellPapAlnRep1.bam
wgEncodeCshlLongRnaSeqHepg2CellPapAlnRep2.bam
wgEncodeCshlLongRnaSeqHuvecCellLongnonpolyaAlnRep1.bam	Huvec
wgEncodeCshlLongRnaSeqHuvecCellLongnonpolyaAlnRep2.bam
wgEncodeCshlLongRnaSeqHuvecCellPapAlnRep1.bam
wgEncodeCshlLongRnaSeqHuvecCellPapAlnRep2.bam
wgEncodeCshlLongRnaSeqImr90CellPapAlnRep1.bam	Imr90
wgEncodeCshlLongRnaSeqImr90CellPapAlnRep2.bam
wgEncodeCshlLongRnaSeqImr90CellTotalAlnRep1.bam
wgEncodeCshlLongRnaSeqImr90CellTotalAlnRep2.bam
wgEncodeCshlLongRnaSeqK562CellLongnonpolyaAlnRep1.bam	K562
wgEncodeCshlLongRnaSeqK562CellLongnonpolyaAlnRep2.bam
wgEncodeCshlLongRnaSeqK562CellPapAlnRep1.bam
wgEncodeCshlLongRnaSeqK562CellPapAlnRep2.bam
wgEncodeCshlLongRnaSeqSknshCellPapAlnRep3.bam	Sknsh
wgEncodeCshlLongRnaSeqSknshCellPapAlnRep4.bam
wgEncodeCshlLongRnaSeqSknshCytosolPapAlnRep3.bam
wgEncodeCshlLongRnaSeqSknshCytosolPapAlnRep4.bam
wgEncodeCshlLongRnaSeqSknshraCellLongnonpolyaAlnRep1.bam	Sknshra
wgEncodeCshlLongRnaSeqSknshraCellLongnonpolyaAlnRep2.bam
wgEncodeCshlLongRnaSeqSknshraCellPapAlnRep1.bam
wgEncodeCshlLongRnaSeqSknshraCellPapAlnRep2.bam
wgEncodeHaibRnaSeqPanc1AlnRep1.bam	Panc1
wgEncodeHaibRnaSeqPanc1AlnRep2.bam
wgEncodeHaibRnaSeqPfsk1AlnRep1.bam	Pfsk1
wgEncodeHaibRnaSeqPfsk1AlnRep2.bam
wgEncodeHaibRnaSeqT47dBpa14hAlnRep1.bam	T47d
wgEncodeHaibRnaSeqT47dBpa14hAlnRep2.bam
wgEncodeHaibRnaSeqT47dDm002p4hAlnRep1.bam
wgEncodeHaibRnaSeqT47dDm002p4hAlnRep2.bam
wgEncodeHaibRnaSeqU87AlnRep1V2.bam	U87
wgEncodeHaibRnaSeqU87AlnRep2V2.bam

## Sheet: S6-Heterodimers
Supplementary Table 6: List of Heterodimerizing TFs and their name.
TRANSFAC id	Name
M00001	<NA>
M00002	TCF3
M00005	TFAP4
M00006	MEF2A
M00008	<NA>
M00017	<NA>
M00024	E2F1
M00026	MEF2A
M00034	<NA>
M00035	<NA>
M00036	<NA>
M00040	ATF2
M00041	JUN
M00050	E2F1
M00051	<NA>
M00052	RELA
M00053	REL
M00054	RELA
M00055	MYCN
M00056	NFIC
M00065	TCF3
M00066	TCF3
M00070	TAL1
M00071	TCF3
M00075	GATA1
M00096	<NA>
M00109	CEBPB
M00116	CEBPA
M00117	CEBPB
M00118	MYC
M00119	<NA>
M00121	USF1
M00122	USF1
M00123	MYC
M00124	<NA>
M00126	GATA1
M00127	GATA1
M00128	GATA1
M00132	<NA>
M00134	HNF4A
M00139	<NA>
M00146	HSF1
M00152	SRF
M00158	NR2F1
M00159	CEBPA
M00172	FOS
M00175	TFAP4
M00176	TFAP4
M00179	ATF2
M00184	<NA>
M00185	NFYB
M00186	SRF
M00187	USF1
M00190	CEBPA
M00191	ESR1
M00192	NR3C1
M00193	NFIC
M00194	NFKB1
M00196	<NA>
M00201	CEBPA
M00203	GATA1
M00205	NR3C1
M00206	<NA>
M00208	<NA>
M00215	SRF
M00217	USF1
M00222	TCF3
M00223	STAT1
M00224	STAT1
M00225	STAT3
M00231	MEF2A
M00232	MEF2A
M00233	MEF2A
M00235	<NA>
M00236	<NA>
M00237	<NA>
M00240	NKX2-5
M00241	NKX2-5
M00242	PPARA
M00243	EGR1
M00249	CEBPA
M00251	XBP1
M00260	<NA>
M00271	RUNX1
M00272	<NA>
M00280	RFX1
M00281	RFX1
M00284	NFE2L1
M00285	NFE2L1
M00302	NFATC1
M00322	MYC
M00327	PAX3
M00338	<NA>
M00341	GABPA
M00346	GATA1
M00347	GATA1
M00360	PAX3
M00403	MEF2A
M00405	MEF2A
M00406	MEF2A
M00407	MEF2A
M00411	HNF4A
M00416	<NA>
M00419	<NA>
M00420	HOXA9
M00421	HOXA9
M00425	<NA>
M00426	<NA>
M00427	<NA>
M00428	E2F1
M00430	E2F1
M00431	E2F1
M00444	VDR
M00457	STAT5A
M00460	STAT5A
M00466	HIF1A
M00490	<NA>
M00491	<NA>
M00492	STAT1
M00493	STAT5A
M00495	BACH1
M00496	STAT1
M00497	STAT3
M00498	STAT4
M00499	STAT5A
M00511	ESRRA
M00512	PPARG
M00513	ATF3
M00514	ATF4
M00515	PPARG
M00516	E2F1
M00517	FOS
M00518	RXRA
M00528	PPARG
M00538	XBP1
M00539	<NA>
M00615	MYC
M00619	<NA>
M00621	CEBPD
M00622	CEBPG
M00626	RFX1
M00631	NR1H4
M00638	HNF4A
M00641	HSF1
M00646	<NA>
M00647	NR1H3
M00691	<NA>
M00693	TCF3
M00698	TCF12
M00712	<NA>
M00726	USF2
M00731	RUNX2
M00736	<NA>
M00737	<NA>
M00738	<NA>
M00739	<NA>
M00744	POU1F1
M00750	HMGA1
M00761	TP63
M00762	NR2F2
M00763	PPARA
M00764	HNF4A
M00765	NR2F2
M00766	<NA>
M00767	<NA>
M00769	RUNX1
M00770	CEBPA
M00774	RELA
M00775	NFYB
M00777	STAT1
M00778	<NA>
M00789	GATA1
M00790	<NA>
M00792	<NA>
M00796	USF1
M00797	HIF1A
M00799	MYC
M00801	ATF7
M00802	POU1F1
M00803	E2F1
M00804	TCF3
M00806	NFIC
M00807	EGR1
M00808	PAX5
M00810	SRF
M00821	NFE2L2
M00912	CEBPA
M00916	CREB1
M00917	CREB1
M00918	E2F1
M00919	E2F1
M00920	E2F1
M00921	NR3C1
M00922	SRF
M00924	FOS
M00925	FOS
M00926	FOS
M00927	TFAP4
M00929	TCF3
M00931	SP3
M00932	SP3
M00933	SP3
M00935	NFATC1
M00938	E2F1
M00939	E2F1
M00940	E2F1
M00941	MEF2A
M00955	NR3C1
M00959	ESR1
M00960	NR3C1
M00961	VDR
M00963	RARB
M00964	NR1I3
M00965	NR2F2
M00966	VDR
M00967	NR2F2
M00971	ERG
M00973	TCF3
M00974	<NA>
M00975	RFX2
M00976	HIF1A
M00981	ATF7
M00982	EGR1
M00983	NFE2
M00984	RUNX1
M00993	TAL1
M00998	PBX2
M01007	SRF
M01009	<NA>
M01010	HMGA1
M01011	<NA>
M01013	<NA>
M01023	HSF1
M01029	TFE3
M01031	HNF4A
M01032	HNF4A
M01033	HNF4A
M01034	MYC
M01036	NR2F2
M01043	NKX2-5
M01075	ZBTB16
M01116	<NA>
M01145	MYC
M01154	MYC
M01196	NFIC
M01249	EPAS1
M01250	E2F1
M01251	E2F1
M01252	E2F6
M01257	SRF
M01260	STAT1
M01267	FOSL1
M01268	NR1H4
M01269	NR4A2
M01270	PPARG
M01281	NFATC2
M01282	PPARA
M01287	NEUROD1
M01288	NEUROD1
M01303	<NA>
M01304	SRF
M01339	PAX7
M01351	HOXA9
M01355	ALX3
M01357	<NA>
M01362	<NA>
M01379	<NA>
M01411	PKNOX2
M01414	NKX2-5
M01417	<NA>
M01419	<NA>
M01425	<NA>
M01453	<NA>
M01459	PKNOX1
M01465	POU1F1
M01588	KLF4
M01591	TAL1
M01595	STAT3
M01651	<NA>
M01652	<NA>
M01653	HMGA1
M01655	<NA>
M01658	RUNX1
M01666	STAT4
M01716	ATOH1
M01718	NFATC1
M01724	THRA
M01770	XBP1
M01801	ESR1
M01808	MYCN
M01820	CREM
M01823	STAT1
M01830	<NA>
M01835	KLF4
M01841	ESRRA

## Sheet: S7-Enrichment
Supplementary Table 7: Hypergeometric test results: a) identified co-factors are enriched for heterodimerizing TFs, b) identified co-factors are enriched for same family as that of the reference TF.
		a) Enrichment of PPI			b) Enrichment of heterodimerizing motifs			c) Enrichment of same family TFs
TF	Cell	Odds Ratio	p.value	Enriched?	Odds Ratio	p.value	Enriched?	Odds Ratio	p.value	Enriched?	family
ATF3	A549	6.53238	9.20782e-30	TRUE	1.59514	0.0509574	FALSE	2.09644	0.000874558	TRUE	bZIP, CH
ATF3	H1hesc	6.25573	2.19565e-25	TRUE	1.66866	0.0548757	FALSE	2.01209	0.00549103	TRUE
ATF4	Hepg2	5.9925	1.64231e-26	TRUE	2.60464	0.000154755	TRUE	2.18978	0.00128045	TRUE
ATF4	K562	4.65875	2.75264e-20	TRUE	2.57426	7.49412e-05	TRUE	1.72499	0.0248358	TRUE
BHLHE40	A549	3.50675	1.59104e-07	TRUE	1.66015	0.0622449	FALSE	3.21364	0.000676017	TRUE	bHLH, bZIP
BHLHE40	Gm12878	2.16499	0.000643582	TRUE	1.79594	0.0156284	TRUE	3.5502	2.09385e-05	TRUE
BHLHE40	Hepg2	3.391	1.00576e-10	TRUE	1.8261	0.00632986	TRUE	2.20255	0.0106297	TRUE
BHLHE40	K562	4.19991	1.24572e-11	TRUE	3.69843	2.14902e-07	TRUE	4.07839	3.7397e-06	TRUE
CEBPB	A549	5.42452	2.86441e-14	TRUE	2.46831	0.0120649	TRUE	8.07665	2.01838e-10	TRUE	bzip
CEBPB	Gm12878	3.70843	2.46229e-20	TRUE	1.84977	0.00794844	TRUE	2.77582	0.00119363	TRUE
CEBPB	H1hesc	3.55059	1.09844e-10	TRUE	1.19997	0.625944	FALSE	4.58136	6.17389e-06	TRUE
CEBPB	Helas3	3.43605	1.04203e-14	TRUE	1.59032	0.0925531	FALSE	5.70413	2.75473e-10	TRUE
CEBPB	Hepg2	3.72597	2.22576e-08	TRUE	0.809021	0.694175	FALSE	5.01393	4.37175e-05	TRUE
CEBPB	Imr90	6.54047	1.62673e-15	TRUE	2.65474	0.00891051	TRUE	8.47104	2.37181e-10	TRUE
CEBPB	K562	3.68784	1.22792e-18	TRUE	1.5136	0.10992	FALSE	5.02798	6.99512e-09	TRUE
CTCF	A549	2.95881	0.0161142	TRUE	1.90136	0.216937	FALSE	1.05932	1	FALSE	CH
CTCF	Gm12878	0.789022	0.810235	FALSE	2.32326	0.0438829	TRUE	1.14065	0.773551	FALSE
CTCF	H1hesc	2.3013	0.0134669	TRUE	2.10231	0.0231809	TRUE	0.904439	1	FALSE
CTCF	Hct116	2.95881	0.00135587	TRUE	2.942	0.00224068	TRUE	0.847682	1	FALSE
CTCF	Hek293	1.5342	0.16538	FALSE	1.89359	0.0381097	TRUE	0.908184	1	FALSE
CTCF	Helas3	4.84184	3.44514e-06	TRUE	2.17826	0.0454955	TRUE	0.274944	0.237322	FALSE
CTCF	Hepg2	2.05834	0.0174417	TRUE	1.47219	0.205232	FALSE	1.12827	0.825856	FALSE
CTCF	Huvec	2.27601	0.0315983	TRUE	3.71491	0.00180538	TRUE	0.889988	1	FALSE
CTCF	Imr90	0.394511	0.309434	FALSE	2.95602	0.00802347	TRUE	0.296929	0.347426	FALSE
CTCF	K562	2.95881	0.000125138	TRUE	1.72427	0.0678994	FALSE	0.927032	1	FALSE
CTCF	Mcf7	1.09589	0.723847	FALSE	2.2305	0.00693971	TRUE	0.756947	0.666792	FALSE
CTCF	Sknshra	3.22779	0.00203119	TRUE	2.32327	0.0354705	TRUE	1.32371	0.581603	FALSE
EP300	A549	9.41417	5.07775e-16	TRUE	1.64635	0.0349745	TRUE	0	1	FALSE	no entry in the file
EP300	Gm12878	12.7411	2.95466e-28	TRUE	2.28479	2.89929e-05	TRUE	0	1	FALSE
EP300	H1hesc	7.82612	7.4611e-17	TRUE	0.824364	0.43686	FALSE	0	1	FALSE
EP300	Helas3	11.0633	8.20635e-21	TRUE	1.93661	0.00385862	TRUE	0	1	FALSE
EP300	Hepg2	9.29889	4.23388e-15	TRUE	1.9366	0.00699258	TRUE	0	1	FALSE
EP300	Sknsh	7.48239	3.5984e-17	TRUE	1.01737	0.914899	FALSE	0	1	FALSE
EP300	T47d	5.56954	5.59583e-11	TRUE	1.22157	0.403009	FALSE	0	1	FALSE
FOS	Gm12878	9.90836	1.33966e-62	TRUE	2.21289	0.000752754	TRUE	2.15126	0.0267035	TRUE	bzip
FOS	Helas3	5.08318	4.3867e-38	TRUE	1.48769	0.105089	FALSE	2.84505	0.000638381	TRUE
FOS	Huvec	14.5244	2.87608e-69	TRUE	1.19084	0.568993	FALSE	1.66027	0.180228	FALSE
FOS	K562	11.5441	7.47071e-56	TRUE	2.85881	0.000124732	TRUE	2.21924	0.0539134	FALSE
FOS	Mcf10a	4.57293	1.09807e-22	TRUE	1.8432	0.043794	TRUE	4.37174	6.28127e-06	TRUE
GABPA	A549	2.09284	0.00109807	TRUE	1.40887	0.282925	FALSE	8.72156	7.42053e-06	TRUE	Ets
GABPA	Gm12878	1.15341	0.548433	FALSE	1.8348	0.0205462	TRUE	5.60198	0.000337399	TRUE
GABPA	H1hesc	1.32141	0.252499	FALSE	2.40928	0.00240808	TRUE	8.35358	4.38485e-06	TRUE
GABPA	Helas3	1.49377	0.0782198	FALSE	2.75305	0.000234895	TRUE	7.19925	3.04974e-05	TRUE
GABPA	Hepg2	0.986275	1	FALSE	2.54091	0.000331202	TRUE	6.2222	8.72554e-05	TRUE
GABPA	K562	1.4892	0.03764	TRUE	1.88826	0.0054845	TRUE	7.01149	2.30772e-06	TRUE
JUN	Gm12878	8.53954	1.19383e-95	TRUE	0.87998	0.649739	FALSE	1.33282	0.448376	FALSE	bzip
JUN	H1hesc	7.84956	4.82001e-50	TRUE	1.19569	0.542083	FALSE	4.69111	1.69123e-06	TRUE
JUN	Helas3	6.84218	6.50128e-27	TRUE	1.62695	0.185232	FALSE	6.67594	4.78159e-08	TRUE
JUN	Hepg2	4.87626	1.11297e-28	TRUE	1.99182	0.020034	TRUE	6.0935	1.595e-09	TRUE
JUN	Huvec	13.1448	1.87963e-59	TRUE	1.51592	0.213677	FALSE	3.23573	0.00413773	TRUE
JUN	K562	18.201	5.42681e-90	TRUE	1.74298	0.0793756	FALSE	5.08865	6.3802e-07	TRUE
JUND	Gm12878	7.69214	6.47957e-40	TRUE	1.13782	0.686306	FALSE	3.07954	0.000503992	TRUE	bzip
JUND	H1hesc	5.63584	2.29014e-25	TRUE	1.35611	0.300735	FALSE	3.98939	2.68947e-05	TRUE
JUND	Helas3	8.19336	3.64769e-29	TRUE	2.22243	0.0123204	TRUE	7.79009	1.83583e-12	TRUE
JUND	Hepg2	7.15039	2.14264e-42	TRUE	1.38494	0.194955	FALSE	4.0485	2.67805e-06	TRUE
JUND	K562	15.7798	9.24009e-68	TRUE	1.59032	0.0925531	FALSE	4.25931	3.34925e-06	TRUE
JUND	Sknsh	8.5803	3.80358e-47	TRUE	1.53314	0.0967435	FALSE	3.32649	8.72447e-05	TRUE
MAFK	H1hesc	5.2215	1.21683e-05	TRUE	1.9918	0.049626	TRUE	7.85648	6.37888e-11	TRUE	bzip
MAFK	Helas3	3.35332	0.000183661	TRUE	1.28483	0.383376	FALSE	6.08208	2.72733e-10	TRUE
MAFK	Hepg2	2.40403	0.0102881	TRUE	1.34593	0.311823	FALSE	5.06879	4.60145e-08	TRUE
MAFK	Imr90	4.09705	1.74868e-05	TRUE	1.93657	0.0234921	TRUE	6.8608	9.3587e-12	TRUE
MAFK	K562	5.14584	5.15881e-07	TRUE	1.8157	0.0379016	TRUE	6.52006	4.42165e-11	TRUE
MAZ	Gm12878	1.16237	0.603442	FALSE	1.32849	0.208777	FALSE	2.10546	0.00370656	TRUE	CH
MAZ	Helas3	1.30389	0.400187	FALSE	1.68696	0.0152792	TRUE	1.92642	0.0100605	TRUE
MAZ	Hepg2	2.15188	0.00489695	TRUE	1.21159	0.379324	FALSE	2.05384	0.00459554	TRUE
MAZ	K562	1.72597	0.0722069	FALSE	1.26092	0.341141	FALSE	2.23933	0.00251213	TRUE
MXI1	Gm12878	8.20805	4.64414e-18	TRUE	1.77084	0.00672915	TRUE	1.84316	0.0506616	FALSE	bhlh-bzip
MXI1	H1hesc	9.86249	2.27958e-16	TRUE	1.7198	0.0211696	TRUE	3.25501	7.70532e-05	TRUE
MXI1	Helas3	7.96576	9.68602e-15	TRUE	1.99188	0.00209417	TRUE	1.38303	0.421961	FALSE
MXI1	Hepg2	11.1776	7.87708e-17	TRUE	2.6898	2.19652e-05	TRUE	2.23226	0.0159686	TRUE
MXI1	K562	10.8489	4.39108e-21	TRUE	2.32343	0.000127472	TRUE	2.70283	0.000969597	TRUE
MYC	A549	3.07349	1.41831e-22	TRUE	1.95419	0.00571644	TRUE	1.82466	0.092259	FALSE	bhlh-bzip
MYC	Gm12878	3.00731	2.30521e-20	TRUE	2.00105	0.00898448	TRUE	3.42153	9.17283e-05	TRUE
MYC	H1hesc	2.60731	1.5755e-15	TRUE	1.29762	0.337837	FALSE	2.16301	0.0307295	TRUE
MYC	Helas3	5.32591	1.39955e-62	TRUE	1.92838	0.00500719	TRUE	1.75658	0.108851	FALSE
MYC	Hepg2	2.70209	1.7356e-22	TRUE	1.32849	0.208777	FALSE	1.55564	0.183228	FALSE
MYC	Huvec	3.5113	3.03334e-28	TRUE	1.87055	0.0128446	TRUE	2.45434	0.00780657	TRUE
MYC	K562	2.78367	8.59437e-22	TRUE	1.9456	0.00540936	TRUE	1.77741	0.140522	FALSE
MYC	Mcf7	3.02761	1.69524e-28	TRUE	2.13002	0.000916237	TRUE	2.76275	0.000850529	TRUE
NRF1	Gm12878	0	0.00712004	TRUE	1.2992	0.362046	FALSE	1.65287	0.232847	FALSE	bzip
NRF1	H1hesc	0.179324	0.0522609	FALSE	2.23408	0.00757226	TRUE	1.8145	0.14134	FALSE
NRF1	Helas3	0.268985	0.238341	FALSE	1.91379	0.0774345	FALSE	2.64183	0.0238375	TRUE
NRF1	Hepg2	0	0.157323	FALSE	2.9033	0.00946801	TRUE	0.399619	0.722596	FALSE
NRF1	K562	0.227603	0.16639	FALSE	1.02316	1	FALSE	2.73722	0.0146898	TRUE
REST	A549	5.58888	1.12679e-21	TRUE	1.62697	0.118017	FALSE	0.302982	0.107712	FALSE	CH
REST	Gm12878	0.696196	0.414725	FALSE	0.951357	1	FALSE	0.59359	0.759674	FALSE
REST	H1hesc	0.657519	0.338607	FALSE	1.99178	0.0865657	FALSE	0.322736	0.34483	FALSE
REST	Helas3	1.47941	0.153898	FALSE	2.14478	0.0759178	FALSE	0.309295	0.344918	FALSE
REST	Hepg2	0	7.45439e-06	TRUE	1.83476	0.0893908	FALSE	0.549656	0.563705	FALSE
REST	K562	5.12869	6.68219e-16	TRUE	2.4522	0.0100095	TRUE	0	0.0408286	FALSE
REST	Panc1	1.18351	0.613816	FALSE	1.77708	0.156763	FALSE	0.889988	1	FALSE
REST	Pfsk1	1.12714	0.66894	FALSE	1.59029	0.240549	FALSE	0.265129	0.237579	FALSE
REST	Sknsh	1.80816	0.00117147	TRUE	1.58478	0.0675805	FALSE	0.711363	0.467796	FALSE
REST	U87	2.19172	8.68434e-05	TRUE	2.0747	0.0137709	TRUE	0.979459	1	FALSE
RFX5	Gm12878	2.57943	0.00196483	TRUE	1.90567	0.00440144	TRUE	0.904439	1	FALSE	fork
RFX5	H1hesc	3.17015	0.000674995	TRUE	1.68504	0.0431311	TRUE	0.990631	1	FALSE
RFX5	Helas3	4.08134	6.30748e-06	TRUE	1.58735	0.0789714	FALSE	1.92012	0.127941	FALSE
RFX5	Hepg2	3.72597	7.08709e-05	TRUE	1.2109	0.509474	FALSE	2.29641	0.0308589	TRUE
RFX5	K562	2.59792	0.00136052	TRUE	1.49715	0.066347	FALSE	0.723751	0.810303	FALSE
SRF	Gm12878	4.43847	1.75931e-30	TRUE	1.49965	0.211259	FALSE	0	0.636306	FALSE	Mads
SRF	H1hesc	4.5089	7.26269e-33	TRUE	1.52922	0.121109	FALSE	0	0.393409	FALSE
SRF	Hepg2	4.69347	3.70921e-48	TRUE	1.24853	0.384772	FALSE	0	0.243564	FALSE
SRF	K562	4.82192	2.92653e-47	TRUE	1.92716	0.00918182	TRUE	0	0.243389	FALSE
TBP	Gm12878	4.69347	5.62826e-25	TRUE	0.959734	0.904491	FALSE	0	1	FALSE	tata
TBP	H1hesc	5.9176	2.00955e-32	TRUE	1.05695	0.816296	FALSE	0	1	FALSE
TBP	Helas3	5.04104	1.6196e-26	TRUE	1.81888	0.0126298	TRUE	0	1	FALSE
TBP	Hepg2	4.1426	1.6851e-20	TRUE	0.855068	0.555264	FALSE	0	1	FALSE
TBP	K562	6.87201	6.93555e-51	TRUE	1.38138	0.12788	FALSE	0	1	FALSE
TCF12	A549	2.36052	1.16708e-08	TRUE	1.88138	0.00195171	TRUE	1.26601	0.475352	FALSE	bhlh
TCF12	Gm12878	3.89879	2.04701e-13	TRUE	1.82159	0.0268502	TRUE	1.7228	0.170051	FALSE
TCF12	H1hesc	2.95881	9.84801e-09	TRUE	0.775291	0.413294	FALSE	3.01287	0.00122384	TRUE
TCF12	Hepg2	1.91443	1.29886e-05	TRUE	1.79296	0.00291771	TRUE	1.17051	0.591435	FALSE
TCF7L2	Hct116	1.25525	0.426481	FALSE	1.92553	0.0169329	TRUE	4.97447	0.00465087	TRUE	HMG
TCF7L2	Hek293	2.23307	4.71099e-05	TRUE	0.54743	0.0174692	FALSE	3.07061	0.0323475	TRUE
TCF7L2	Helas3	1.69075	0.0214959	TRUE	1.90567	0.00440144	TRUE	4.21841	0.00570484	TRUE
TCF7L2	Hepg2	3.82914	1.09743e-10	TRUE	0.750313	0.315134	FALSE	6.56425	7.65312e-05	TRUE
TCF7L2	Mcf7	1.66108	0.0133504	TRUE	1.87555	0.0035464	TRUE	3.19952	0.027758	TRUE
TCF7L2	Panc1	1.33984	0.210798	FALSE	1.16253	0.549555	FALSE	3.45282	0.0207563	TRUE
USF1	A549	3.73271	2.92222e-26	TRUE	2.32339	0.000538772	TRUE	1.96421	0.0596225	FALSE	bhlh-bzip
USF1	Gm12878	3.44049	2.82163e-15	TRUE	2.32333	0.00340054	TRUE	3.51559	0.00031438	TRUE
USF1	H1hesc	6.59002	2.9723e-34	TRUE	3.82463	2.03764e-05	TRUE	4.13897	7.45939e-05	TRUE
USF1	Hepg2	2.70248	9.33881e-12	TRUE	1.24747	0.400847	FALSE	2.64939	0.00655942	TRUE
USF1	K562	4.17377	8.45784e-17	TRUE	2.5443	0.00399697	TRUE	2.76205	0.0101309	TRUE
YY1	A549	4.37417	9.04113e-18	TRUE	1.11204	0.683799	FALSE	1.21539	0.568332	FALSE	CH
YY1	Gm12878	2.62995	2.52513e-07	TRUE	1.2153	0.492785	FALSE	0.741821	0.688174	FALSE
YY1	H1hesc	3.11453	7.04388e-08	TRUE	1.48509	0.148779	FALSE	0.855819	0.835401	FALSE
YY1	Hct116	4.06858	4.99682e-21	TRUE	1.39482	0.149438	FALSE	0.785406	0.610186	FALSE
YY1	Hepg2	4.19195	4.28305e-17	TRUE	1.13976	0.60578	FALSE	0.996147	1	FALSE
YY1	K562	4.6028	1.39009e-15	TRUE	1.10723	0.775581	FALSE	1.17064	0.692238	FALSE
YY1	Nt2d1	5.71357	3.44697e-35	TRUE	1.51984	0.0874841	FALSE	0.542949	0.211877	FALSE
YY1	Sknshra	3.72597	3.07166e-15	TRUE	1.02856	0.896749	FALSE	0.674445	0.444472	FALSE
ZNF143	Gm12878	1.29899	0.318491	FALSE	1.43903	0.173774	FALSE	0.763615	0.70494	FALSE	CH
ZNF143	H1hesc	0.845385	1	FALSE	1.74296	0.149965	FALSE	0.549656	0.563705	FALSE
ZNF143	Helas3	2.09983	0.00461232	TRUE	1.37099	0.256343	FALSE	0.717915	0.556112	FALSE
ZNF143	K562	0.821897	0.640156	FALSE	1.47409	0.134302	FALSE	0.598365	0.421929	FALSE

## Sheet: S8-ProteinDomains
Supplementary Table 8: List of protein domains found as enriched in the identified co-factors. The analysis was done using DAVID tool (Huang, Brad T Sherman, et al. 2009).
TF	Cell	Category	Term	Fold.Enrichment	FDR
ATF3	A549	INTERPRO	bZIP transcription factor, bZIP-1	7.26203	1.12926e-07
ATF3		SMART	BRLZ	4.99301	1.84427e-07
ATF3		INTERPRO	Basic-leucine zipper (bZIP) transcription factor	4.80992	8.35652e-07
ATF3		INTERPRO	Kelch related	8.81818	4.82329
ATF3		SMART	FH	4.22485	4.88315
ATF3		INTERPRO	Transcription factor, fork head, conserved site	4.06993	8.74953
ATF3		INTERPRO	Transcription factor, fork head	4.06993	8.74953
ATF3	H1hesc	INTERPRO	Helix-loop-helix DNA-binding	5.05089	5.89417e-11
ATF3		SMART	HLH	4.64686	1.70386e-10
ATF3		INTERPRO	Basic helix-loop-helix dimerisation region bHLH	4.42878	1.3342e-09
ATF3		SMART	BRLZ	3.60606	2.92722e-05
ATF3		INTERPRO	Basic-leucine zipper (bZIP) transcription factor	3.43683	0.000137654
ATF3		INTERPRO	bZIP transcription factor, bZIP-1	4.21357	0.00636998
ATF3		INTERPRO	Basic leucine zipper	3.97949	1.01061
ATF3	Hepg2	SMART	HLH	4.68453	2.17604e-11
ATF3		INTERPRO	Helix-loop-helix DNA-binding	5.05089	5.99298e-11
ATF3		INTERPRO	Basic helix-loop-helix dimerisation region bHLH	4.62134	6.99774e-11
ATF3		SMART	BRLZ	2.93374	0.0198005
ATF3		INTERPRO	Basic-leucine zipper (bZIP) transcription factor	2.89417	0.0396615
ATF3		INTERPRO	bZIP transcription factor, bZIP-1	3.86244	0.0615259
ATF3	K562	SMART	HLH	4.90851	7.77156e-14
ATF3		INTERPRO	Basic helix-loop-helix dimerisation region bHLH	4.71622	5.88418e-13
ATF3		INTERPRO	Helix-loop-helix DNA-binding	4.75808	2.61768e-10
ATF3		SMART	BRLZ	2.83756	0.0315914
ATF3		INTERPRO	Basic-leucine zipper (bZIP) transcription factor	2.72639	0.0907651
ATF3		INTERPRO	bZIP transcription factor, bZIP-1	3.63853	0.110908
ATF3		SMART	ZnF_GATA	5.85246	2.24952
ATF3		INTERPRO	Zinc finger, GATA-type	5.62319	3.98112
BHLHE40	A549	INTERPRO	bZIP transcription factor, bZIP-1	5.85219	0.00442257
BHLHE40		INTERPRO	Basic-leucine zipper (bZIP) transcription factor	3.61772	0.077053
BHLHE40		SMART	BRLZ	3.41627	0.0773845
BHLHE40		INTERPRO	Fos transforming protein	7.95897	7.26858
BHLHE40	Gm12878	SMART	ETS	5.38578	3.3092e-06
BHLHE40		INTERPRO	Ets	5.38889	5.57689e-06
BHLHE40		INTERPRO	Winged helix repressor DNA-binding	2.59315	0.00103172
BHLHE40		SMART	IRF	5.38578	0.196279
BHLHE40		INTERPRO	Interferon regulatory factor, conserved site	5.38889	0.301782
BHLHE40		INTERPRO	Interferon regulatory factor	5.38889	0.301782
BHLHE40		INTERPRO	bZIP transcription factor, bZIP-1	3.62278	0.350102
BHLHE40		SMART	BRLZ	2.61129	0.375311
BHLHE40		INTERPRO	Basic-leucine zipper (bZIP) transcription factor	2.6128	0.60451
BHLHE40		SMART	HLH	2.5812	0.781324
BHLHE40		INTERPRO	Basic helix-loop-helix dimerisation region bHLH	2.58269	1.24174
BHLHE40		SMART	SAM_PNT	4.61638	2.31796
BHLHE40		INTERPRO	Sterile alpha motif/pointed	4.61905	3.51606
BHLHE40		INTERPRO	Sterile alpha motif-type	4.10582	6.82826
BHLHE40		INTERPRO	Interferon regulatory factor-3	5.13227	7.04908
BHLHE40		INTERPRO	SMAD domain-like	5.13227	7.04908
BHLHE40	Hepg2	INTERPRO	bZIP transcription factor, bZIP-1	4.7691	4.98382e-05
BHLHE40		INTERPRO	High mobility group, HMG1/HMG2	5.34558	0.000102832
BHLHE40		SMART	HMG	4.99301	0.000141404
BHLHE40		INTERPRO	Basic-leucine zipper (bZIP) transcription factor	3.15875	0.00177561
BHLHE40		SMART	BRLZ	2.95041	0.00316747
BHLHE40		INTERPRO	Zinc finger, NHR/GATA-type	2.43833	0.444159
BHLHE40		SMART	ZnF_GATA	5.40909	3.07162
BHLHE40		INTERPRO	Fos transforming protein	5.79105	3.53895
BHLHE40		INTERPRO	Zinc finger, GATA-type	5.79105	3.53895
BHLHE40	K562	INTERPRO	bZIP transcription factor, bZIP-1	5.83858	0.000881221
BHLHE40		SMART	BRLZ	3.98565	0.00178763
BHLHE40		INTERPRO	Basic-leucine zipper (bZIP) transcription factor	3.82805	0.00553583
BHLHE40		SMART	ZnF_GATA	9.39474	0.311452
BHLHE40		INTERPRO	Fos transforming protein	9.02326	0.567016
BHLHE40		INTERPRO	Zinc finger, GATA-type	9.02326	0.567016
BHLHE40		SMART	HLH	2.7275	5.55399
CEBPB	A549	SMART	BRLZ	8.65455	8.41911e-16
CEBPB		INTERPRO	Basic-leucine zipper (bZIP) transcription factor	8.70932	4.66047e-15
CEBPB		INTERPRO	bZIP transcription factor, bZIP-1	12.6797	3.10862e-13
CEBPB		INTERPRO	Fos transforming protein	14.3704	0.0705723
CEBPB		INTERPRO	Basic leucine zipper	7.18518	0.482524
CEBPB	Gm12878	INTERPRO	bZIP transcription factor, bZIP-1	5.07189	2.54792e-07
CEBPB		SMART	ETS	4.99534	1.12097e-06
CEBPB		INTERPRO	Ets	5.05208	1.47001e-06
CEBPB		SMART	BRLZ	3.06784	0.000696801
CEBPB		INTERPRO	Basic-leucine zipper (bZIP) transcription factor	3.10269	0.000921521
CEBPB		INTERPRO	Winged helix repressor DNA-binding	2.45809	0.000927085
CEBPB		SMART	IRF	5.32836	0.0304563
CEBPB		INTERPRO	Interferon regulatory factor, conserved site	5.38889	0.040016
CEBPB		INTERPRO	Interferon regulatory factor	5.38889	0.040016
CEBPB		SMART	SAM_PNT	4.66231	0.531771
CEBPB		INTERPRO	Sterile alpha motif/pointed	4.71528	0.702022
CEBPB		INTERPRO	Interferon regulatory factor-3	5.38889	1.02298
CEBPB		INTERPRO	SMAD domain-like	5.38889	1.02298
CEBPB		INTERPRO	Sterile alpha motif-type	4.19136	1.79079
CEBPB		INTERPRO	Fos transforming protein	5.38889	4.82274
CEBPB	H1hesc	SMART	BRLZ	7.32845	2.20452e-14
CEBPB		INTERPRO	Basic-leucine zipper (bZIP) transcription factor	6.85859	6.32827e-13
CEBPB		INTERPRO	bZIP transcription factor, bZIP-1	8.87582	4.50288e-09
CEBPB		INTERPRO	Basic leucine zipper	6.28704	0.208352
CEBPB		INTERPRO	Fos transforming protein	10.7778	0.249891
CEBPB	Helas3	SMART	BRLZ	5.92424	2.10942e-13
CEBPB		INTERPRO	Basic-leucine zipper (bZIP) transcription factor	6.14601	2.22045e-13
CEBPB		INTERPRO	bZIP transcription factor, bZIP-1	8.81818	4.44089e-13
CEBPB		INTERPRO	Fos transforming protein	8.81818	0.609374
CEBPB		INTERPRO	Basic leucine zipper	5.14394	0.733553
CEBPB		INTERPRO	Kelch related	8.81818	4.62303
CEBPB	Hepg2	SMART	BRLZ	6.39256	4.2833e-06
CEBPB		INTERPRO	Basic-leucine zipper (bZIP) transcription factor	6.64559	5.7765e-06
CEBPB		INTERPRO	bZIP transcription factor, bZIP-1	6.94629	0.118735
CEBPB		INTERPRO	Basic leucine zipper	8.43478	0.196944
CEBPB	Imr90	INTERPRO	Basic-leucine zipper (bZIP) transcription factor	10.2879	5.28305e-19
CEBPB		SMART	BRLZ	9.46591	1.45114e-18
CEBPB		INTERPRO	bZIP transcription factor, bZIP-1	14.2647	2.82093e-14
CEBPB		INTERPRO	Basic leucine zipper	9.43056	0.0140214
CEBPB		INTERPRO	Fos transforming protein	16.1667	0.0396024
CEBPB		INTERPRO	Jun-like transcription factor	16.1667	8.1299
CEBPB		INTERPRO	Transcription factor Jun	16.1667	8.1299
CEBPB	K562	SMART	BRLZ	5.40909	6.28472e-17
CEBPB		INTERPRO	Basic-leucine zipper (bZIP) transcription factor	5.22559	6.01075e-16
CEBPB		INTERPRO	bZIP transcription factor, bZIP-1	6.15873	4.61087e-10
CEBPB		SMART	ZnF_GATA	6.375	1.59828
CEBPB		SMART	POU	4.05682	1.81147
CEBPB		INTERPRO	Fos transforming protein	6.15873	2.69607
CEBPB		INTERPRO	Maf transcription factor	6.15873	2.69607
CEBPB		INTERPRO	Zinc finger, GATA-type	6.15873	2.69607
CEBPB		INTERPRO	POU-specific	3.91919	3.25045
CEBPB		INTERPRO	POU	3.91919	3.25045
CEBPB		INTERPRO	Basic leucine zipper	3.59259	5.62505
CEBPB		INTERPRO	DNA-binding RFX	5.13227	6.97275
CTCF	A549	INTERPRO	Helix-loop-helix DNA-binding	6.63248	0.0292623
CTCF		SMART	HLH	5.75807	0.0407416
CTCF		INTERPRO	Basic helix-loop-helix dimerisation region bHLH	5.56272	0.103599
CTCF	Gm12878	INTERPRO	Helix-loop-helix DNA-binding	8.95385	1.58823e-16
CTCF		INTERPRO	Basic helix-loop-helix dimerisation region bHLH	7.86728	1.02118e-15
CTCF		SMART	HLH	7.23871	3.81949e-15
CTCF	H1hesc	SMART	ZnF_C4	3.53077	0.791379
CTCF		SMART	HOLI	3.43269	0.970314
CTCF		INTERPRO	Zinc finger, nuclear hormone receptor-type	3.56326	1.25137
CTCF		INTERPRO	Steroid hormone receptor	3.56326	1.25137
CTCF		INTERPRO	Nuclear hormone receptor, ligand-binding	3.46429	1.53207
CTCF		INTERPRO	Nuclear hormone receptor, ligand-binding, core	3.46429	1.53207
CTCF		INTERPRO	Helix-loop-helix DNA-binding	3.73077	5.50317
CTCF		SMART	HLH	3.1005	8.75466
CTCF		INTERPRO	Zinc finger, NHR/GATA-type	2.91729	9.71357
CTCF	Hct116	INTERPRO	Helix-loop-helix DNA-binding	8.63968	2.55402e-17
CTCF		SMART	HLH	7.56774	7.92509e-17
CTCF		INTERPRO	Basic helix-loop-helix dimerisation region bHLH	7.57555	2.91739e-16
CTCF	Hek293	SMART	HLH	5.62416	5.58997e-11
CTCF		INTERPRO	Helix-loop-helix DNA-binding	6.09105	5.65104e-11
CTCF		INTERPRO	Basic helix-loop-helix dimerisation region bHLH	5.36405	4.27225e-10
CTCF	Helas3	INTERPRO	Acute myeloid leukemia 1 protein (AML 1)/Runt	20.4211	5.36874
CTCF		INTERPRO	Runx inhibition	20.4211	5.36874
CTCF		INTERPRO	Acute myeloid leukemia 1 (AML 1)/Runt	20.4211	5.36874
CTCF		INTERPRO	Transcription factor, Runt-related, RUNX	20.4211	5.36874
CTCF	Hepg2	SMART	ZnF_C4	3.11667	0.452441
CTCF		SMART	HOLI	3.03009	0.583044
CTCF		INTERPRO	Zinc finger, nuclear hormone receptor-type	2.83588	1.8601
CTCF		INTERPRO	Nuclear hormone receptor, ligand-binding, core	2.75711	2.3639
CTCF		INTERPRO	Nuclear hormone receptor, ligand-binding	2.75711	2.3639
CTCF		INTERPRO	Steroid hormone receptor	2.57807	7.1297
CTCF	Huvec	SMART	ZnF_C4	4.17273	0.170045
CTCF		SMART	HOLI	4.05682	0.210924
CTCF		INTERPRO	Steroid hormone receptor	3.44039	1.60537
CTCF		INTERPRO	Zinc finger, nuclear hormone receptor-type	3.44039	1.60537
CTCF		INTERPRO	Nuclear hormone receptor, ligand-binding, core	3.34483	1.95988
CTCF		INTERPRO	Nuclear hormone receptor, ligand-binding	3.34483	1.95988
CTCF		INTERPRO	Transcription factor E2F/dimerisation partner (TDP)	8.91954	5.59848
CTCF	Imr90	SMART	HLH	6.90968	0.193289
CTCF		INTERPRO	Transcription factor E2F/dimerisation partner (TDP)	18.4762	0.478501
CTCF		INTERPRO	Helix-loop-helix DNA-binding	6.3956	0.697686
CTCF		INTERPRO	Basic helix-loop-helix dimerisation region bHLH	5.36405	1.63789
CTCF		INTERPRO	E2F Family	16.6286	8.11933
CTCF	K562	INTERPRO	Transcription factor E2F/dimerisation partner (TDP)	10.3467	3.54944
CTCF		INTERPRO	Transcription factor AP-2	15.52	9.88328
CTCF		INTERPRO	Transcription factor AP-2, C-terminal	15.52	9.88328
CTCF	Mcf7	SMART	HLH	7.78117	1.21694e-19
CTCF		INTERPRO	Helix-loop-helix DNA-binding	7.62029	2.4508e-18
CTCF		INTERPRO	Basic helix-loop-helix dimerisation region bHLH	6.65752	1.22331e-16
CTCF	Sknshra	INTERPRO	Helix-loop-helix DNA-binding	7.64353	1.46024e-14
CTCF		SMART	HLH	6.66723	6.66134e-14
CTCF		INTERPRO	Basic helix-loop-helix dimerisation region bHLH	6.71597	1.11022e-13
EP300	A549	SMART	BRLZ	5.18371	1.34781e-11
EP300		INTERPRO	Basic-leucine zipper (bZIP) transcription factor	4.50707	1.37379e-09
EP300		INTERPRO	bZIP transcription factor, bZIP-1	5.70588	4.27931e-07
EP300		INTERPRO	Basic leucine zipper	4.31111	0.615534
EP300		INTERPRO	Fos transforming protein	6.46667	2.30171
EP300		INTERPRO	DNA-binding RFX	5.38889	6.01092
EP300	Gm12878	INTERPRO	bZIP transcription factor, bZIP-1	4.17204	5.3425e-07
EP300		SMART	BRLZ	2.48694	0.0120363
EP300		INTERPRO	Basic-leucine zipper (bZIP) transcription factor	2.52851	0.0136989
EP300		INTERPRO	NF-kappa-B/Rel/dorsal	4.17204	0.257574
EP300		INTERPRO	Rel homology	4.17204	0.257574
EP300		SMART	IPT	3.28276	2.0014
EP300		INTERPRO	Cell surface receptor IPT/TIG	3.33763	2.47988
EP300		INTERPRO	Immunoglobulin-like fold	3.33763	2.47988
EP300		SMART	IRF	3.59052	2.55919
EP300		INTERPRO	Interferon regulatory factor, conserved site	3.65054	3.19897
EP300		INTERPRO	Interferon regulatory factor	3.65054	3.19897
EP300		SMART	ETS	2.56466	3.90085
EP300		INTERPRO	Ets	2.60753	4.76251
EP300	H1hesc	INTERPRO	bZIP transcription factor, bZIP-1	4.27941	3.4177e-05
EP300		INTERPRO	Basic-leucine zipper (bZIP) transcription factor	2.79242	0.00563749
EP300		SMART	BRLZ	2.66942	0.00774009
EP300		INTERPRO	High mobility group, HMG1/HMG2	3.73077	0.154841
EP300		SMART	HMG	3.56643	0.160663
EP300		INTERPRO	Fos transforming protein	4.85	7.18643
EP300	Helas3	SMART	BRLZ	4.58397	1.10578e-11
EP300		INTERPRO	Basic-leucine zipper (bZIP) transcription factor	4.6657	1.46105e-11
EP300		INTERPRO	bZIP transcription factor, bZIP-1	5.79645	2.68384e-08
EP300		INTERPRO	Basic leucine zipper	5.13227	0.00642421
EP300		SMART	ZnF_GATA	6.05085	2.1399
EP300		INTERPRO	Fos transforming protein	6.15873	2.80758
EP300		INTERPRO	Zinc finger, GATA-type	6.15873	2.80758
EP300	Hepg2	INTERPRO	Zinc finger, NHR/GATA-type	3.73077	3.85176e-05
EP300		SMART	HOLI	3.09896	0.0206471
EP300		INTERPRO	Steroid hormone receptor	3.1978	0.0246413
EP300		INTERPRO	Nuclear hormone receptor, ligand-binding, core	3.10897	0.0364384
EP300		INTERPRO	Nuclear hormone receptor, ligand-binding	3.10897	0.0364384
EP300		SMART	ZnF_C4	2.975	0.0775375
EP300		INTERPRO	Vitamin D receptor	4.7967	0.0887721
EP300		INTERPRO	Zinc finger, nuclear hormone receptor-type	2.98461	0.134181
EP300		SMART	ZnF_GATA	7.4375	0.775612
EP300		SMART	BRLZ	2.70454	0.884588
EP300		INTERPRO	Zinc finger, GATA-type	7.46154	1.25466
EP300		INTERPRO	Basic-leucine zipper (bZIP) transcription factor	2.71329	1.48031
EP300		INTERPRO	bZIP transcription factor, bZIP-1	3.51131	3.19372
EP300	Sknsh	SMART	ZnF_GATA	5.17391	3.91329
EP300		INTERPRO	Zinc finger, GATA-type	5.03896	6.29651
EP300	T47d	SMART	BRLZ	3.93388	4.51651e-09
EP300		INTERPRO	Basic-leucine zipper (bZIP) transcription factor	3.71292	3.99367e-08
EP300		INTERPRO	bZIP transcription factor, bZIP-1	4.50464	1.62775e-05
EP300		INTERPRO	Basic leucine zipper	3.82895	0.395725
EP300		SMART	ZnF_GATA	5.40909	3.28837
EP300		INTERPRO	Zinc finger, GATA-type	5.10526	6.02165
EP300		INTERPRO	Fos transforming protein	5.10526	6.02165
FOS	Gm12878	SMART	HLH	4.82934	1.55431e-13
FOS		INTERPRO	Basic helix-loop-helix dimerisation region bHLH	4.78558	3.55271e-13
FOS		INTERPRO	Helix-loop-helix DNA-binding	4.82805	1.82831e-10
FOS	Helas3	SMART	BRLZ	3.24546	0.0108446
FOS		INTERPRO	Basic-leucine zipper (bZIP) transcription factor	2.93939	0.070721
FOS		SMART	ZnF_GATA	7.14	0.942653
FOS		INTERPRO	Zinc finger, GATA-type	6.46667	2.21367
FOS		INTERPRO	DNA-binding RFX	5.38889	5.78528
FOS		INTERPRO	bZIP transcription factor, bZIP-1	3.04314	7.4545
FOS	Huvec	INTERPRO	Ets	6.80702	6.05205e-10
FOS		SMART	ETS	6.375	1.08776e-09
FOS		INTERPRO	Winged helix repressor DNA-binding	2.86611	9.93543e-05
FOS		INTERPRO	Sterile alpha motif/pointed	6.80702	0.0067889
FOS		SMART	SAM_PNT	6.375	0.00734002
FOS		INTERPRO	Sterile alpha motif-type	6.05068	0.0271087
FOS		INTERPRO	Interferon regulatory factor	5.95614	0.161126
FOS		INTERPRO	Interferon regulatory factor, conserved site	5.95614	0.161126
FOS		SMART	IRF	5.57812	0.161968
FOS		INTERPRO	Basic-leucine zipper (bZIP) transcription factor	2.47528	3.35066
FOS		SMART	BRLZ	2.31818	3.91619
FOS		INTERPRO	SMAD domain-like	5.67251	4.72955
FOS		INTERPRO	Interferon regulatory factor-3	5.67251	4.72955
FOS		INTERPRO	bZIP transcription factor, bZIP-1	3.2033	5.49129
FOS	K562	SMART	BRLZ	4.05682	0.010212
FOS		INTERPRO	bZIP transcription factor, bZIP-1	5.26697	0.0502374
FOS		INTERPRO	Basic-leucine zipper (bZIP) transcription factor	3.61772	0.0752017
FOS	Mcf10a	SMART	BRLZ	4.55502	1.89769e-05
FOS		INTERPRO	Basic-leucine zipper (bZIP) transcription factor	3.76242	0.000837872
FOS		INTERPRO	Basic leucine zipper	5.17333	0.171683
FOS		INTERPRO	DNA-binding RFX	6.46667	2.89238
FOS		INTERPRO	Winged helix repressor DNA-binding	2.0421	5.48194
GABPA	A549	INTERPRO	bZIP transcription factor, bZIP-1	7.9617	1.77903e-09
GABPA		SMART	BRLZ	4.83971	1.40276e-06
GABPA		INTERPRO	Basic-leucine zipper (bZIP) transcription factor	4.64834	6.32597e-06
GABPA		SMART	SH2	9.39474	0.00339941
GABPA		INTERPRO	STAT transcription factor, all-alpha	9.02326	0.00722472
GABPA		INTERPRO	SH2 motif	9.02326	0.00722472
GABPA		INTERPRO	STAT transcription factor, DNA-binding	9.02326	0.00722472
GABPA		INTERPRO	STAT transcription factor, core	9.02326	0.00722472
GABPA		INTERPRO	STAT transcription factor, protein interaction	9.02326	0.00722472
GABPA		INTERPRO	STAT transcription factor, DNA-binding, subdomain	9.02326	0.00722472
GABPA		INTERPRO	EF-Hand type	7.89535	0.0265612
GABPA		INTERPRO	Fos transforming protein	9.02326	0.539459
GABPA		INTERPRO	E2F Family	7.21861	9.47389
GABPA	Gm12878	SMART	BRLZ	4.56768	2.72274e-07
GABPA		INTERPRO	Basic-leucine zipper (bZIP) transcription factor	4.55906	5.76907e-07
GABPA		INTERPRO	bZIP transcription factor, bZIP-1	6.52101	5.77378e-07
GABPA		INTERPRO	Fos transforming protein	7.91837	1.01313
GABPA	H1hesc	SMART	SH2	9.91667	0.00266298
GABPA		INTERPRO	Winged helix repressor DNA-binding	2.69444	0.0147854
GABPA		INTERPRO	SH2 motif	8.08333	0.0152099
GABPA		INTERPRO	STAT transcription factor, protein interaction	8.08333	0.0152099
GABPA		INTERPRO	STAT transcription factor, all-alpha	8.08333	0.0152099
GABPA		INTERPRO	STAT transcription factor, DNA-binding, subdomain	8.08333	0.0152099
GABPA		INTERPRO	STAT transcription factor, core	8.08333	0.0152099
GABPA		INTERPRO	STAT transcription factor, DNA-binding	8.08333	0.0152099
GABPA		SMART	ETS	5.57812	0.0196295
GABPA		INTERPRO	EF-Hand type	7.07292	0.0552317
GABPA		INTERPRO	Ets	4.54688	0.160866
GABPA		SMART	DWA	9.91667	2.2348
GABPA		INTERPRO	DNA-binding RFX	6.73611	2.39717
GABPA		SMART	SAM_PNT	6.19792	2.82759
GABPA		INTERPRO	CTF transcription factor/nuclear factor 1, N-terminal	8.08333	6.06395
GABPA		INTERPRO	CTF transcription factor/nuclear factor 1, conserved site	8.08333	6.06395
GABPA		INTERPRO	CTF transcription factor/nuclear factor 1	8.08333	6.06395
GABPA		INTERPRO	MAD homology 1, Dwarfin-type	8.08333	6.06395
GABPA		INTERPRO	Sterile alpha motif/pointed	5.05208	8.99648
GABPA	Helas3	INTERPRO	bZIP transcription factor, bZIP-1	7.98824	2.41885e-08
GABPA		SMART	BRLZ	5.40909	1.49973e-07
GABPA		INTERPRO	Basic-leucine zipper (bZIP) transcription factor	4.99697	1.63405e-06
GABPA		SMART	SH2	10.5	0.00157761
GABPA		INTERPRO	STAT transcription factor, DNA-binding, subdomain	9.7	0.00448809
GABPA		INTERPRO	STAT transcription factor, DNA-binding	9.7	0.00448809
GABPA		INTERPRO	STAT transcription factor, core	9.7	0.00448809
GABPA		INTERPRO	SH2 motif	9.7	0.00448809
GABPA		INTERPRO	STAT transcription factor, all-alpha	9.7	0.00448809
GABPA		INTERPRO	STAT transcription factor, protein interaction	9.7	0.00448809
GABPA		INTERPRO	EF-Hand type	8.4875	0.0166214
GABPA		INTERPRO	Fos transforming protein	9.7	0.395989
GABPA		INTERPRO	E2F Family	7.76	7.64022
GABPA	Hepg2	SMART	SH2	10.8182	0.0015305
GABPA		INTERPRO	STAT transcription factor, all-alpha	9.7	0.00478718
GABPA		INTERPRO	SH2 motif	9.7	0.00478718
GABPA		INTERPRO	STAT transcription factor, protein interaction	9.7	0.00478718
GABPA		INTERPRO	STAT transcription factor, DNA-binding, subdomain	9.7	0.00478718
GABPA		INTERPRO	STAT transcription factor, DNA-binding	9.7	0.00478718
GABPA		INTERPRO	STAT transcription factor, core	9.7	0.00478718
GABPA		INTERPRO	EF-Hand type	8.4875	0.017729
GABPA		SMART	BRLZ	3.27824	0.724629
GABPA		INTERPRO	Basic-leucine zipper (bZIP) transcription factor	2.93939	2.7354
GABPA		INTERPRO	bZIP transcription factor, bZIP-1	3.99412	3.84478
GABPA		SMART	ETS	4.05682	6.24641
GABPA	K562	SMART	SH2	8.11364	0.0108739
GABPA		INTERPRO	SH2 motif	7.46154	0.0266236
GABPA		INTERPRO	STAT transcription factor, DNA-binding, subdomain	7.46154	0.0266236
GABPA		INTERPRO	STAT transcription factor, core	7.46154	0.0266236
GABPA		INTERPRO	STAT transcription factor, protein interaction	7.46154	0.0266236
GABPA		INTERPRO	STAT transcription factor, all-alpha	7.46154	0.0266236
GABPA		INTERPRO	STAT transcription factor, DNA-binding	7.46154	0.0266236
GABPA		INTERPRO	EF-Hand type	6.52885	0.0957122
GABPA		SMART	ZnF_GATA	8.11364	0.650809
GABPA		INTERPRO	Zinc finger, GATA-type	7.46154	1.29058
GABPA		SMART	ETS	3.54972	5.17876
GABPA		SMART	BRLZ	2.45868	7.31758
GABPA		INTERPRO	Winged helix repressor DNA-binding	1.96356	8.33237
JUN	Gm12878	SMART	ETS	4.80577	1.91956e-05
JUN		INTERPRO	Ets	4.65069	4.68291e-05
JUN		SMART	IRF	5.49231	0.0247316
JUN		INTERPRO	Interferon regulatory factor	5.31507	0.045217
JUN		INTERPRO	Interferon regulatory factor, conserved site	5.31507	0.045217
JUN		INTERPRO	Winged helix repressor DNA-binding	2.14468	0.0965444
JUN		SMART	SH2	5.49231	0.131031
JUN		INTERPRO	SH2 motif	5.31507	0.229124
JUN		INTERPRO	STAT transcription factor, DNA-binding	5.31507	0.229124
JUN		INTERPRO	STAT transcription factor, core	5.31507	0.229124
JUN		INTERPRO	STAT transcription factor, protein interaction	5.31507	0.229124
JUN		INTERPRO	STAT transcription factor, all-alpha	5.31507	0.229124
JUN		INTERPRO	STAT transcription factor, DNA-binding, subdomain	5.31507	0.229124
JUN		INTERPRO	EF-Hand type	4.65069	0.778996
JUN		INTERPRO	Interferon regulatory factor-3	5.31507	1.12112
JUN		INTERPRO	SMAD domain-like	5.31507	1.12112
JUN		SMART	SAM_PNT	4.11923	4.55396
JUN		INTERPRO	Maf transcription factor	5.31507	5.20106
JUN		INTERPRO	Sterile alpha motif/pointed	3.9863	7.4221
JUN	H1hesc	INTERPRO	Basic-leucine zipper (bZIP) transcription factor	5.53298	1.13396e-06
JUN		SMART	BRLZ	5.24518	1.45799e-06
JUN		INTERPRO	bZIP transcription factor, bZIP-1	6.04152	0.0161038
JUN		INTERPRO	Basic leucine zipper	6.65686	0.150324
JUN	Helas3	INTERPRO	Basic-leucine zipper (bZIP) transcription factor	8.55096	9.17377e-11
JUN		SMART	BRLZ	7.86777	1.62914e-10
JUN		INTERPRO	Basic leucine zipper	11.7576	0.000267678
JUN		INTERPRO	bZIP transcription factor, bZIP-1	7.26203	0.085833
JUN		INTERPRO	CCAAT/enhancer-binding	17.6364	6.70625
JUN	Hepg2	INTERPRO	Basic-leucine zipper (bZIP) transcription factor	6.59571	2.77003e-14
JUN		SMART	BRLZ	6.22046	6.66134e-14
JUN		INTERPRO	bZIP transcription factor, bZIP-1	6.12339	0.000496626
JUN		INTERPRO	Basic leucine zipper	6.30894	0.0386846
JUN		INTERPRO	Kelch related	9.46341	3.61256
JUN		INTERPRO	Maf transcription factor	7.57073	8.20311
JUN	Huvec	SMART	ETS	8.36719	1.8695e-10
JUN		INTERPRO	Ets	8.66071	2.23488e-10
JUN		SMART	SAM_PNT	7.80938	0.0161215
JUN		INTERPRO	Sterile alpha motif/pointed	8.08333	0.022585
JUN		INTERPRO	Winged helix repressor DNA-binding	2.75522	0.0374711
JUN		INTERPRO	Sterile alpha motif-type	7.18518	0.0624178
JUN		SMART	BRLZ	2.70454	2.74725
JUN		INTERPRO	Nuclear factor of activated T cells (NFAT)	2.79942	3.71366
JUN		INTERPRO	Basic-leucine zipper (bZIP) transcription factor	9.23809	3.86793
JUN		INTERPRO	Nuclear factor of activated T cells (NFAT), subgroup	9.23809	3.86793
JUN		INTERPRO	bZIP transcription factor, bZIP-1	3.80392	4.67317
JUN	K562	INTERPRO	Basic-leucine zipper (bZIP) transcription factor	4.77651	0.000848463
JUN		SMART	BRLZ	4.53666	0.000970759
JUN		SMART	ZnF_GATA	11.5161	0.131552
JUN		INTERPRO	Zinc finger, GATA-type	12.125	0.154376
JUN		INTERPRO	bZIP transcription factor, bZIP-1	4.99265	1.01689
JUN		INTERPRO	Basic leucine zipper	5.05208	9.75097
JUND	Gm12878	SMART	ETS	6.04297	5.71729e-06
JUND		INTERPRO	Ets	5.94811	1.2276e-05
JUND		INTERPRO	Winged helix repressor DNA-binding	3.08242	1.63885e-05
JUND		SMART	BRLZ	3.60606	0.000862469
JUND		INTERPRO	Basic-leucine zipper (bZIP) transcription factor	3.54946	0.00198715
JUND		SMART	IRF	7.4375	0.00216908
JUND		INTERPRO	Interferon regulatory factor	7.32076	0.00390641
JUND		INTERPRO	Interferon regulatory factor, conserved site	7.32076	0.00390641
JUND		INTERPRO	bZIP transcription factor, bZIP-1	4.30633	0.0761763
JUND		INTERPRO	Interferon regulatory factor-3	7.32076	0.19833
JUND		INTERPRO	SMAD domain-like	7.32076	0.19833
JUND		SMART	SAM_PNT	4.64844	7.97088
JUND	H1hesc	INTERPRO	Basic-leucine zipper (bZIP) transcription factor	3.55462	0.0362874
JUND		SMART	BRLZ	3.34849	0.0473075
JUND		INTERPRO	POU-specific	5.74207	0.33982
JUND		INTERPRO	POU	5.74207	0.33982
JUND		SMART	POU	5.40909	0.341723
JUND		INTERPRO	bZIP transcription factor, bZIP-1	4.24624	0.883778
JUND		INTERPRO	Helix-loop-helix DNA-binding	3.12344	3.31453
JUND	Helas3	INTERPRO	Basic-leucine zipper (bZIP) transcription factor	8.32828	1.98619e-11
JUND		SMART	BRLZ	7.66288	4.12337e-11
JUND		INTERPRO	Basic leucine zipper	12.125	1.54954e-05
JUND		INTERPRO	bZIP transcription factor, bZIP-1	6.65686	0.155371
JUND		INTERPRO	CCAAT/enhancer-binding	16.1667	8.19077
JUND	Hepg2	SMART	HMG	7.01146	2.14045e-06
JUND		INTERPRO	High mobility group, HMG1/HMG2	6.88757	4.53328e-06
JUND		SMART	BRLZ	2.99226	0.154564
JUND		INTERPRO	Basic-leucine zipper (bZIP) transcription factor	2.93939	0.311398
JUND		INTERPRO	Basic leucine zipper	4.35256	1.86545
JUND		INTERPRO	DNA-binding RFX	6.21795	3.15607
JUND	K562	SMART	BRLZ	3.60606	0.00246362
JUND		INTERPRO	Basic-leucine zipper (bZIP) transcription factor	3.52727	0.00588453
JUND		SMART	ZnF_GATA	7.93333	0.612451
JUND		SMART	ETS	3.96667	0.870868
JUND		INTERPRO	Zinc finger, GATA-type	7.76	1.01881
JUND		INTERPRO	Ets	3.88	1.55768
JUND		INTERPRO	bZIP transcription factor, bZIP-1	3.65177	2.38265
JUND		SMART	SAM_PNT	4.95833	6.29665
JUND	Sknsh	SMART	ETS	5.1209	7.07398e-06
JUND		SMART	BRLZ	3.54695	1.32552e-05
JUND		INTERPRO	Ets	4.99265	1.69261e-05
JUND		INTERPRO	Basic-leucine zipper (bZIP) transcription factor	3.45811	4.06586e-05
JUND		INTERPRO	bZIP transcription factor, bZIP-1	4.36332	0.000950821
JUND		SMART	SH2	5.85246	0.0798901
JUND		INTERPRO	STAT transcription factor, protein interaction	5.70588	0.143501
JUND		INTERPRO	STAT transcription factor, all-alpha	5.70588	0.143501
JUND		INTERPRO	SH2 motif	5.70588	0.143501
JUND		INTERPRO	STAT transcription factor, DNA-binding, subdomain	5.70588	0.143501
JUND		INTERPRO	STAT transcription factor, core	5.70588	0.143501
JUND		INTERPRO	STAT transcription factor, DNA-binding	5.70588	0.143501
JUND		INTERPRO	EF-Hand type	4.99265	0.49473
JUND		SMART	SAM_PNT	4.38934	3.06303
JUND		INTERPRO	Sterile alpha motif/pointed	4.27941	5.20182
JUND		INTERPRO	Sterile alpha motif-type	3.80392	9.90852
MAFK	H1hesc	SMART	BRLZ	7.46082	1.11022e-13
MAFK		INTERPRO	Basic-leucine zipper (bZIP) transcription factor	7.1258	2.12053e-12
MAFK		INTERPRO	bZIP transcription factor, bZIP-1	8.99109	5.0598e-08
MAFK		INTERPRO	Kelch related	11.7576	1.83411
MAFK		INTERPRO	Fos transforming protein	9.40606	4.27847
MAFK		INTERPRO	Maf transcription factor	9.40606	4.27847
MAFK		INTERPRO	Transcription factor E2F/dimerisation partner (TDP)	7.83838	7.93741
MAFK	Helas3	INTERPRO	Basic-leucine zipper (bZIP) transcription factor	5.74815	1.25122e-11
MAFK		SMART	BRLZ	5.40909	2.35367e-11
MAFK		INTERPRO	bZIP transcription factor, bZIP-1	6.59346	4.10864e-06
MAFK		SMART	POU	5.16322	0.381419
MAFK		INTERPRO	POU	5.48687	0.444192
MAFK		INTERPRO	POU-specific	5.48687	0.444192
MAFK		INTERPRO	Kelch related	8.62222	4.79612
MAFK		INTERPRO	Basic leucine zipper	4.31111	6.12292
MAFK	Hepg2	INTERPRO	Basic-leucine zipper (bZIP) transcription factor	5.59885	1.01507e-09
MAFK		SMART	BRLZ	5.27716	1.62526e-09
MAFK		INTERPRO	bZIP transcription factor, bZIP-1	6.52101	3.57538e-05
MAFK		SMART	POU	5.54102	0.239686
MAFK		INTERPRO	POU	5.87879	0.284266
MAFK		INTERPRO	POU-specific	5.87879	0.284266
MAFK		INTERPRO	Fos transforming protein	7.39048	8.55476
MAFK		INTERPRO	Maf transcription factor	7.39048	8.55476
MAFK	Imr90	INTERPRO	Basic-leucine zipper (bZIP) transcription factor	7.34849	5.82248e-18
MAFK		SMART	BRLZ	6.76136	2.73073e-17
MAFK		INTERPRO	bZIP transcription factor, bZIP-1	7.98824	2.32684e-08
MAFK		INTERPRO	Basic leucine zipper	6.46667	0.0310849
MAFK		INTERPRO	Kelch related	9.7	3.2272
MAFK		INTERPRO	Fos transforming protein	7.76	7.36057
MAFK		INTERPRO	Maf transcription factor	7.76	7.36057
MAFK	K562	INTERPRO	Basic-leucine zipper (bZIP) transcription factor	6.1882	8.6775e-11
MAFK		SMART	BRLZ	5.69378	2.59193e-10
MAFK		INTERPRO	bZIP transcription factor, bZIP-1	7.80805	3.88919e-07
MAFK		INTERPRO	Kelch related	10.2105	2.83064
MAFK		INTERPRO	Fos transforming protein	8.16842	6.49732
MAFK		INTERPRO	Maf transcription factor	8.16842	6.49732
MAFK		SMART	ETS	3.52303	9.80848
MAZ	Gm12878	INTERPRO	bZIP transcription factor, bZIP-1	3.99412	0.000562028
MAZ		SMART	BRLZ	2.8548	0.00229541
MAZ		INTERPRO	Basic-leucine zipper (bZIP) transcription factor	2.79242	0.00560112
MAZ		SMART	IRF	4.95833	0.0476532
MAZ		INTERPRO	Interferon regulatory factor	4.85	0.0842512
MAZ		INTERPRO	Interferon regulatory factor, conserved site	4.85	0.0842512
MAZ		SMART	ETS	3.40885	0.117126
MAZ		INTERPRO	Ets	3.33438	0.221264
MAZ		INTERPRO	Winged helix repressor DNA-binding	1.95702	0.471876
MAZ		INTERPRO	SMAD domain-like	4.85	1.70756
MAZ		INTERPRO	Interferon regulatory factor-3	4.85	1.70756
MAZ		SMART	ZnF_C2H2	1.8117	3.6991
MAZ		SMART	SAM_PNT	3.71875	6.68142
MAZ		INTERPRO	Fos transforming protein	4.85	7.14176
MAZ		INTERPRO	Zinc finger, C2H2-like	1.77212	7.50444
MAZ		INTERPRO	Zinc finger, C2H2-type	1.73868	9.3911
MAZ	Helas3	SMART	BRLZ	3.5	1.36886e-06
MAZ		INTERPRO	Basic-leucine zipper (bZIP) transcription factor	3.59259	1.42276e-06
MAZ		INTERPRO	bZIP transcription factor, bZIP-1	4.7549	6.79472e-06
MAZ		SMART	ETS	4.26562	0.000551538
MAZ		INTERPRO	Ets	4.37847	0.000634621
MAZ		SMART	ZnF_C2H2	1.91827	1.70872
MAZ		INTERPRO	Zinc finger, C2H2-like	1.96902	1.92889
MAZ		INTERPRO	Basic leucine zipper	3.59259	1.98013
MAZ		INTERPRO	Zinc finger, C2H2-type	1.93187	2.49069
MAZ		INTERPRO	Fos transforming protein	5.38889	4.59433
MAZ		SMART	SAM_PNT	3.9375	4.97456
MAZ		INTERPRO	Sterile alpha motif/pointed	4.04167	6.50369
MAZ	Hepg2	INTERPRO	Basic-leucine zipper (bZIP) transcription factor	3.2488	4.38864e-05
MAZ		SMART	BRLZ	3.1553	4.65774e-05
MAZ		INTERPRO	bZIP transcription factor, bZIP-1	4.20433	0.000281341
MAZ		INTERPRO	Zinc finger, C2H2-like	2.15992	0.128274
MAZ		SMART	ZnF_C2H2	2.09776	0.131299
MAZ		INTERPRO	Zinc finger, C2H2-type	2.11917	0.180478
MAZ		INTERPRO	Zinc finger, C2H2-type/integrase, DNA-binding	2.02083	1.36377
MAZ		INTERPRO	Basic leucine zipper	3.40351	2.88146
MAZ		INTERPRO	Fos transforming protein	5.10526	5.8447
MAZ	K562	INTERPRO	bZIP transcription factor, bZIP-1	5.43417	8.66168e-07
MAZ		INTERPRO	Basic-leucine zipper (bZIP) transcription factor	3.73256	8.32407e-06
MAZ		SMART	BRLZ	3.60606	8.66427e-06
MAZ		INTERPRO	Zinc finger, C2H2-like	2.48718	0.0172639
MAZ		SMART	ZnF_C2H2	2.40288	0.0174941
MAZ		INTERPRO	Zinc finger, C2H2-type	2.44025	0.0244827
MAZ		INTERPRO	Zinc finger, C2H2-type/integrase, DNA-binding	2.30952	0.320501
MAZ		SMART	ETS	3.34687	1.01978
MAZ		INTERPRO	Ets	3.46429	1.26166
MAZ		SMART	ZnF_GATA	5.95	1.96514
MAZ		INTERPRO	Zinc finger, GATA-type	6.15873	2.65568
MAZ		INTERPRO	Fos transforming protein	6.15873	2.65568
MXI1	Gm12878	INTERPRO	bZIP transcription factor, bZIP-1	4.68175	9.81701e-07
MXI1		SMART	BRLZ	3.39077	1.05796e-05
MXI1		INTERPRO	Basic-leucine zipper (bZIP) transcription factor	3.1655	7.82333e-05
MXI1		INTERPRO	Winged helix repressor DNA-binding	2.18174	0.0249598
MXI1		SMART	IRF	4.66231	0.518054
MXI1		INTERPRO	Interferon regulatory factor, conserved site	4.35256	1.16291
MXI1		INTERPRO	Interferon regulatory factor	4.35256	1.16291
MXI1		SMART	ETS	2.9972	2.59541
MXI1		SMART	HLH	2.23447	3.51464
MXI1		INTERPRO	Ets	2.79808	6.17719
MXI1		INTERPRO	Fos transforming protein	4.97436	6.78674
MXI1		INTERPRO	Basic helix-loop-helix dimerisation region bHLH	2.08602	9.75008
MXI1	H1hesc	SMART	HLH	3.16129	0.0404204
MXI1		INTERPRO	Basic helix-loop-helix dimerisation region bHLH	2.82622	0.24386
MXI1		SMART	BRLZ	2.75758	0.436144
MXI1		INTERPRO	bZIP transcription factor, bZIP-1	3.31309	1.95796
MXI1		INTERPRO	Basic-leucine zipper (bZIP) transcription factor	2.4653	2.09267
MXI1		SMART	DWA	7	6.82486
MXI1		INTERPRO	DNA-binding RFX	5.21505	6.83227
MXI1	Helas3	SMART	BRLZ	4.44318	9.12381e-10
MXI1		INTERPRO	Basic-leucine zipper (bZIP) transcription factor	3.75589	1.31995e-07
MXI1		INTERPRO	bZIP transcription factor, bZIP-1	5.07189	2.55816e-07
MXI1		INTERPRO	Fos transforming protein	5.38889	4.84164
MXI1	Hepg2	INTERPRO	bZIP transcription factor, bZIP-1	6.29615	6.54479e-09
MXI1		SMART	BRLZ	4.54364	1.40241e-08
MXI1		INTERPRO	Basic-leucine zipper (bZIP) transcription factor	4.25705	1.32716e-07
MXI1		SMART	HLH	2.76387	0.797282
MXI1		INTERPRO	Fos transforming protein	6.68966	2.01895
MXI1		INTERPRO	Basic helix-loop-helix dimerisation region bHLH	2.58954	2.30629
MXI1	K562	INTERPRO	bZIP transcription factor, bZIP-1	4.50464	1.62163e-05
MXI1		SMART	ETS	4.4625	5.11041e-05
MXI1		INTERPRO	Ets	4.46711	8.04098e-05
MXI1		SMART	BRLZ	2.93636	0.00145169
MXI1		INTERPRO	Basic-leucine zipper (bZIP) transcription factor	2.93939	0.00238944
MXI1		SMART	HLH	2.46774	0.391408
MXI1		INTERPRO	Basic helix-loop-helix dimerisation region bHLH	2.47029	0.60159
MXI1		INTERPRO	Winged helix repressor DNA-binding	1.97045	0.644402
MXI1		SMART	SAM_PNT	4.4625	0.661839
MXI1		INTERPRO	Sterile alpha motif/pointed	4.46711	0.974774
MXI1		INTERPRO	Sterile alpha motif-type	3.97076	2.45623
MXI1		SMART	ZnF_GATA	5.1	4.1389
MXI1		INTERPRO	Zinc finger, GATA-type	5.10526	5.99971
MXI1		INTERPRO	Fos transforming protein	5.10526	5.99971
MYC	A549	SMART	SH2	7.76087	0.0140251
MYC		INTERPRO	STAT transcription factor, protein interaction	6.80702	0.0485508
MYC		INTERPRO	STAT transcription factor, DNA-binding	6.80702	0.0485508
MYC		INTERPRO	STAT transcription factor, DNA-binding, subdomain	6.80702	0.0485508
MYC		INTERPRO	SH2 motif	6.80702	0.0485508
MYC		INTERPRO	STAT transcription factor, core	6.80702	0.0485508
MYC		INTERPRO	STAT transcription factor, all-alpha	6.80702	0.0485508
MYC		INTERPRO	EF-Hand type	5.95614	0.172327
MYC		SMART	BRLZ	2.35178	9.63443
MYC	Gm12878	SMART	BRLZ	4.1948	1.46895e-06
MYC		INTERPRO	bZIP transcription factor, bZIP-1	5.50913	6.41342e-06
MYC		INTERPRO	Basic-leucine zipper (bZIP) transcription factor	3.85162	1.61061e-05
MYC		INTERPRO	Fos transforming protein	6.68966	1.93846
MYC		SMART	HLH	2.58525	2.48186
MYC		SMART	ETS	3.1875	7.73713
MYC		INTERPRO	Basic helix-loop-helix dimerisation region bHLH	2.37375	7.86867
MYC	H1hesc	SMART	HMG	6.3864	0.000661008
MYC		INTERPRO	High mobility group, HMG1/HMG2	5.85219	0.00238063
MYC		INTERPRO	Basic leucine zipper	4.43791	1.71713
MYC		INTERPRO	DNA-binding RFX	6.33987	3.00334
MYC		SMART	HLH	2.67817	3.56715
MYC		SMART	BRLZ	2.51586	5.62282
MYC		INTERPRO	Basic helix-loop-helix dimerisation region bHLH	2.45414	9.86989
MYC	Helas3	SMART	BRLZ	4.80808	1.73639e-11
MYC		INTERPRO	Basic-leucine zipper (bZIP) transcription factor	4.40909	4.33287e-10
MYC		INTERPRO	bZIP transcription factor, bZIP-1	6.0625	6.32994e-10
MYC		INTERPRO	Fos transforming protein	6.0625	2.94677
MYC		INTERPRO	Basic leucine zipper	3.53646	6.2703
MYC		INTERPRO	DNA-binding RFX	5.05208	7.58908
MYC	Hepg2	INTERPRO	Basic-leucine zipper (bZIP) transcription factor	4.22538	7.03032e-09
MYC		SMART	BRLZ	3.9495	1.87679e-08
MYC		INTERPRO	Basic leucine zipper	5.55729	0.000360077
MYC		INTERPRO	bZIP transcription factor, bZIP-1	4.27941	0.00551036
MYC		INTERPRO	Ets	3.41016	1.4742
MYC		SMART	ETS	3.1875	1.58147
MYC		SMART	SAM_PNT	4.25	3.56279
MYC		INTERPRO	Sterile alpha motif/pointed	4.54688	3.84454
MYC		INTERPRO	Sterile alpha motif-type	4.04167	7.43747
MYC	Huvec	SMART	BRLZ	4.25633	5.005e-10
MYC		INTERPRO	bZIP transcription factor, bZIP-1	5.79105	1.44255e-09
MYC		INTERPRO	Basic-leucine zipper (bZIP) transcription factor	4.21167	1.44662e-09
MYC		SMART	ETS	5.48668	2.28782e-07
MYC		INTERPRO	Ets	5.4291	4.64284e-07
MYC		SMART	SAM_PNT	5.1209	0.266206
MYC		INTERPRO	Sterile alpha motif/pointed	5.06716	0.436675
MYC		INTERPRO	Sterile alpha motif-type	4.50415	1.13046
MYC		INTERPRO	Fos transforming protein	5.79105	3.47675
MYC		INTERPRO	Winged helix repressor DNA-binding	1.82875	6.81338
MYC	K562	SMART	BRLZ	4.1981	2.16049e-11
MYC		INTERPRO	Basic-leucine zipper (bZIP) transcription factor	4.24579	3.38396e-11
MYC		INTERPRO	bZIP transcription factor, bZIP-1	5.07189	2.4931e-07
MYC		SMART	ETS	4.32929	0.000475893
MYC		INTERPRO	Ets	4.37847	0.000652612
MYC		INTERPRO	Basic leucine zipper	4.04167	0.251871
MYC		SMART	ZnF_GATA	5.32836	3.38023
MYC		INTERPRO	Fos transforming protein	5.38889	4.72146
MYC		INTERPRO	Zinc finger, GATA-type	5.38889	4.72146
MYC		SMART	SAM_PNT	3.99627	4.82051
MYC		INTERPRO	Winged helix repressor DNA-binding	1.7963	6.43173
MYC		INTERPRO	Sterile alpha motif/pointed	4.04167	6.68177
MYC	Mcf7	INTERPRO	Basic-leucine zipper (bZIP) transcription factor	4.1849	1.91825e-07
MYC		SMART	BRLZ	4.05682	1.99355e-07
MYC		INTERPRO	bZIP transcription factor, bZIP-1	4.64207	0.00220837
MYC		SMART	HLH	2.87903	0.123427
MYC		INTERPRO	Basic helix-loop-helix dimerisation region bHLH	2.96993	0.134289
MYC		INTERPRO	Maf transcription factor	6.57627	2.12657
MYC		INTERPRO	Helix-loop-helix DNA-binding	2.52934	8.16477
NRF1	Gm12878	INTERPRO	Transcription factor E2F/dimerisation partner (TDP)	8.34409	7.21625
NRF1	H1hesc	INTERPRO	Winged helix repressor DNA-binding	2.43108	0.750015
NRF1		SMART	HLH	3.57397	0.840342
NRF1		INTERPRO	DNA-binding RFX	7.69841	1.4139
NRF1		INTERPRO	Transcription factor E2F/dimerisation partner (TDP)	7.69841	1.4139
NRF1		INTERPRO	E2F Family	7.39048	9.26509
NRF1		INTERPRO	Basic helix-loop-helix dimerisation region bHLH	2.68203	9.56406
NRF1	Helas3	INTERPRO	Transcription factor E2F/dimerisation partner (TDP)	11.7576	2.39755
NRF1	Hepg2	SMART	DWA	23.8	0.103488
NRF1		INTERPRO	CTF transcription factor/nuclear factor 1, conserved site	18.4762	0.411722
NRF1		INTERPRO	CTF transcription factor/nuclear factor 1	18.4762	0.411722
NRF1		INTERPRO	CTF transcription factor/nuclear factor 1, N-terminal	18.4762	0.411722
NRF1		INTERPRO	MAD homology 1, Dwarfin-type	18.4762	0.411722
NRF1		INTERPRO	Transcription factor E2F/dimerisation partner (TDP)	12.3175	1.91165
NRF1	K562	SMART	BRLZ	5.40909	7.22328e-05
NRF1		INTERPRO	bZIP transcription factor, bZIP-1	7.60784	0.000324798
NRF1		INTERPRO	Basic-leucine zipper (bZIP) transcription factor	5.09495	0.00035552
NRF1		INTERPRO	Fos transforming protein	10.3467	3.31609
NRF1		INTERPRO	Transcription factor E2F/dimerisation partner (TDP)	8.62222	6.21259
REST	A549	INTERPRO	bZIP transcription factor, bZIP-1	9.86963	1.62093e-12
REST		INTERPRO	Basic-leucine zipper (bZIP) transcription factor	6.35545	4.48419e-11
REST		SMART	BRLZ	6.0101	6.7224e-11
REST		INTERPRO	Fos transforming protein	10.4865	0.288079
REST		SMART	FH	4.57692	3.03259
REST		INTERPRO	Transcription factor, fork head	4.83992	3.7275
REST		INTERPRO	Transcription factor, fork head, conserved site	4.83992	3.7275
REST	Gm12878	INTERPRO	Nuclear hormone receptor, ligand-binding, core	4.49074	0.0553824
REST		INTERPRO	Nuclear hormone receptor, ligand-binding	4.49074	0.0553824
REST		SMART	HOLI	4.13194	0.0676779
REST		INTERPRO	Zinc finger, nuclear hormone receptor-type	4.15714	0.332943
REST		INTERPRO	Steroid hormone receptor	4.15714	0.332943
REST		SMART	ZnF_C4	3.825	0.372042
REST		SMART	DWA	14.875	0.518077
REST		INTERPRO	Zinc finger, NHR/GATA-type	3.82895	0.617055
REST		INTERPRO	CTF transcription factor/nuclear factor 1, N-terminal	16.1667	0.646697
REST		INTERPRO	MAD homology 1, Dwarfin-type	16.1667	0.646697
REST		INTERPRO	CTF transcription factor/nuclear factor 1	16.1667	0.646697
REST		INTERPRO	CTF transcription factor/nuclear factor 1, conserved site	16.1667	0.646697
REST	Helas3	INTERPRO	Zinc finger, nuclear hormone receptor-type	4.75102	0.106824
REST		SMART	ZnF_C4	4.37143	0.12418
REST		INTERPRO	Nuclear hormone receptor, ligand-binding, core	4.61905	0.133259
REST		INTERPRO	Nuclear hormone receptor, ligand-binding	4.61905	0.133259
REST		SMART	HOLI	4.25	0.154464
REST		INTERPRO	Zinc finger, NHR/GATA-type	4.37594	0.202683
REST		INTERPRO	Steroid hormone receptor	4.22313	0.822424
REST		INTERPRO	Vitamin D receptor	6.59864	3.43736
REST	K562	SMART	ZnF_GATA	14.875	0.0348492
REST		INTERPRO	Zinc finger, GATA-type	15.52	0.0514879
REST		INTERPRO	bZIP transcription factor, bZIP-1	6.39059	0.217465
REST		SMART	BRLZ	4.05682	0.226797
REST		INTERPRO	Basic-leucine zipper (bZIP) transcription factor	4.23273	0.30515
REST		INTERPRO	Fos transforming protein	12.416	1.79796
REST		INTERPRO	Transcription factor Jun	15.52	9.54415
REST		INTERPRO	Jun-like transcription factor	15.52	9.54415
REST		INTERPRO	Transcription factor, GATA-1/2/3	15.52	9.54415
REST	Panc1	INTERPRO	Helix-loop-helix DNA-binding	5.22308	0.68497
REST		SMART	HLH	4.24278	1.32681
REST		INTERPRO	Basic helix-loop-helix dimerisation region bHLH	4.38065	1.86895
REST	Pfsk1	INTERPRO	Zinc finger, nuclear hormone receptor-type	3.41099	3.66063
REST		INTERPRO	Steroid hormone receptor	3.41099	3.66063
REST		SMART	ZnF_C4	3.13846	3.95142
REST		INTERPRO	Nuclear hormone receptor, ligand-binding	3.31624	4.33455
REST		INTERPRO	Nuclear hormone receptor, ligand-binding, core	3.31624	4.33455
REST		SMART	HOLI	3.05128	4.65953
REST		INTERPRO	Zinc finger, NHR/GATA-type	3.1417	5.95328
REST	Sknsh	INTERPRO	DNA-binding RFX	6.73611	2.41984
REST		SMART	DWA	8.70732	3.24441
REST		SMART	BRLZ	2.63858	3.88916
REST		INTERPRO	MAD homology 1, Dwarfin-type	8.08333	6.1202
REST		INTERPRO	CTF transcription factor/nuclear factor 1, conserved site	8.08333	6.1202
REST		INTERPRO	CTF transcription factor/nuclear factor 1	8.08333	6.1202
REST		INTERPRO	CTF transcription factor/nuclear factor 1, N-terminal	8.08333	6.1202
REST		INTERPRO	Helix-loop-helix DNA-binding	2.79808	7.24544
REST		SMART	ZnF_GATA	6.96585	7.34212
REST		SMART	HLH	2.52793	9.00388
REST		INTERPRO	bZIP transcription factor, bZIP-1	3.32843	9.87515
REST	U87	INTERPRO	bZIP transcription factor, bZIP-1	8.49248	2.98983e-11
REST		SMART	BRLZ	5.84767	1.45017e-10
REST		INTERPRO	Basic-leucine zipper (bZIP) transcription factor	5.46864	1.91973e-09
REST		INTERPRO	Fos transforming protein	9.02326	0.559807
REST		INTERPRO	DNA-binding RFX	7.51938	1.53979
RFX5	A549	INTERPRO	bZIP transcription factor, bZIP-1	9.9	1.6e-12
RFX5		INTERPRO	Basic-leucine zipper (bZIP) transcription factor	6.4	4.5e-11
RFX5		SMART	BRLZ	6	6.7e-11
RFX5		INTERPRO	Fos transforming protein	10.5	0.29
RFX5		INTERPRO	Transcription factor, fork head, conserved site	4.8	3.7
RFX5		INTERPRO	Transcription factor, fork head	4.8	3.7
RFX5		SMART	FH	4.6	3
RFX5	Gm12878	SMART	BRLZ	3.78636	8.99617e-07
RFX5		INTERPRO	bZIP transcription factor, bZIP-1	5.34926	1.1574e-06
RFX5		INTERPRO	Basic-leucine zipper (bZIP) transcription factor	3.85796	1.16635e-06
RFX5		SMART	ETS	4.83437	0.000113705
RFX5		INTERPRO	Ets	4.92578	0.000148263
RFX5		SMART	SAM_PNT	4.4625	2.77977
RFX5		INTERPRO	Fos transforming protein	6.0625	2.96097
RFX5		INTERPRO	Sterile alpha motif/pointed	4.54688	3.86298
RFX5		SMART	HLH	2.30323	4.06243
RFX5		INTERPRO	Basic helix-loop-helix dimerisation region bHLH	2.34677	5.39666
RFX5		INTERPRO	Sterile alpha motif-type	4.04167	7.47245
RFX5	H1hesc	INTERPRO	bZIP transcription factor, bZIP-1	6.39059	7.67869e-07
RFX5		SMART	BRLZ	4.52854	1.3735e-06
RFX5		INTERPRO	Basic-leucine zipper (bZIP) transcription factor	4.23273	9.96615e-06
RFX5		INTERPRO	Fos transforming protein	7.76	1.08685
RFX5		SMART	DWA	8.30233	3.91091
RFX5		INTERPRO	CTF transcription factor/nuclear factor 1, conserved site	7.76	7.10706
RFX5		INTERPRO	MAD homology 1, Dwarfin-type	7.76	7.10706
RFX5		INTERPRO	CTF transcription factor/nuclear factor 1, N-terminal	7.76	7.10706
RFX5		INTERPRO	CTF transcription factor/nuclear factor 1	7.76	7.10706
RFX5	Helas3	SMART	BRLZ	5.03171	5.84251e-09
RFX5		INTERPRO	bZIP transcription factor, bZIP-1	6.84706	2.30288e-08
RFX5		INTERPRO	Basic-leucine zipper (bZIP) transcription factor	4.70303	6.36028e-08
RFX5		SMART	SH2	8.30233	0.00804441
RFX5		INTERPRO	SH2 motif	7.76	0.0203067
RFX5		INTERPRO	STAT transcription factor, DNA-binding	7.76	0.0203067
RFX5		INTERPRO	STAT transcription factor, core	7.76	0.0203067
RFX5		INTERPRO	STAT transcription factor, protein interaction	7.76	0.0203067
RFX5		INTERPRO	STAT transcription factor, all-alpha	7.76	0.0203067
RFX5		INTERPRO	STAT transcription factor, DNA-binding, subdomain	7.76	0.0203067
RFX5		INTERPRO	EF-Hand type	6.79	0.073372
RFX5		INTERPRO	Fos transforming protein	7.76	1.07549
RFX5	Hepg2	SMART	BRLZ	5.53488	1.3356e-11
RFX5		INTERPRO	Basic-leucine zipper (bZIP) transcription factor	5.50355	4.17555e-11
RFX5		INTERPRO	bZIP transcription factor, bZIP-1	7.76971	1.50513e-10
RFX5		INTERPRO	Fos transforming protein	8.25532	0.802403
RFX5		SMART	FH	4.47048	1.09741
RFX5		INTERPRO	Transcription factor, fork head	4.44517	1.82058
RFX5		INTERPRO	Transcription factor, fork head, conserved site	4.44517	1.82058
RFX5	K562	SMART	BRLZ	3.87822	7.29554e-06
RFX5		INTERPRO	Basic-leucine zipper (bZIP) transcription factor	3.85162	1.67048e-05
RFX5		INTERPRO	bZIP transcription factor, bZIP-1	4.72211	0.00184143
RFX5		SMART	POU	4.8988	0.134496
RFX5		INTERPRO	POU-specific	4.8652	0.230856
RFX5		INTERPRO	POU	4.8652	0.230856
RFX5		SMART	ZnF_GATA	6.73585	1.22495
RFX5		INTERPRO	Zinc finger, GATA-type	6.68966	2.00979
SRF	Gm12878	INTERPRO	bZIP transcription factor, bZIP-1	8.40867	1.15235e-08
SRF		SMART	BRLZ	5.24518	1.49593e-06
SRF		INTERPRO	Basic-leucine zipper (bZIP) transcription factor	4.95056	8.89062e-06
SRF		INTERPRO	Fos transforming protein	10.2105	0.339742
SRF	H1hesc	INTERPRO	Winged helix repressor DNA-binding	2.87407	0.00475157
SRF		SMART	ETS	5.90625	0.0111951
SRF		INTERPRO	Ets	4.85	0.0982473
SRF		INTERPRO	Sterile alpha motif-type	5.74815	1.38266
SRF		INTERPRO	DNA-binding RFX	7.18518	1.88849
SRF		SMART	SAM_PNT	6.5625	2.09174
SRF		SMART	BRLZ	2.86364	3.76865
SRF		INTERPRO	bZIP transcription factor, bZIP-1	3.55033	7.19082
SRF		INTERPRO	Sterile alpha motif/pointed	5.38889	7.2278
SRF	Hepg2	SMART	SH2	7.93333	0.0115487
SRF		INTERPRO	STAT transcription factor, protein interaction	7.32076	0.0294219
SRF		INTERPRO	SH2 motif	7.32076	0.0294219
SRF		INTERPRO	STAT transcription factor, DNA-binding	7.32076	0.0294219
SRF		INTERPRO	STAT transcription factor, core	7.32076	0.0294219
SRF		INTERPRO	STAT transcription factor, DNA-binding, subdomain	7.32076	0.0294219
SRF		INTERPRO	STAT transcription factor, all-alpha	7.32076	0.0294219
SRF		INTERPRO	EF-Hand type	6.40566	0.105506
SRF		SMART	BRLZ	2.88485	0.523021
SRF		SMART	ETS	3.96667	0.933805
SRF		INTERPRO	Basic-leucine zipper (bZIP) transcription factor	2.66209	1.78087
SRF		INTERPRO	Ets	3.66038	2.38954
SRF		INTERPRO	Winged helix repressor DNA-binding	2.05495	3.55182
SRF		INTERPRO	Transcription factor E2F/dimerisation partner (TDP)	6.10063	3.65213
SRF	K562	INTERPRO	bZIP transcription factor, bZIP-1	7.46154	1.19904e-11
SRF		SMART	BRLZ	4.93874	1.53251e-09
SRF		INTERPRO	Basic-leucine zipper (bZIP) transcription factor	4.74825	9.78235e-09
SRF		SMART	ETS	6.79076	9.4989e-08
SRF		INTERPRO	Ets	6.52885	3.31829e-07
SRF		INTERPRO	Winged helix repressor DNA-binding	2.61808	0.0123434
SRF		SMART	SAM_PNT	6.79076	0.0406623
SRF		INTERPRO	Sterile alpha motif/pointed	6.52885	0.0885968
SRF		INTERPRO	Sterile alpha motif-type	5.80342	0.238798
SRF		INTERPRO	Fos transforming protein	7.46154	1.19517
SRF		INTERPRO	Kelch related	7.46154	7.48381
TBP	Gm12878	INTERPRO	bZIP transcription factor, bZIP-1	4.91584	3.32166e-05
TBP		SMART	BRLZ	3.47727	0.000189183
TBP		INTERPRO	Basic-leucine zipper (bZIP) transcription factor	3.25594	0.00108455
TBP		SMART	IRF	5.57812	0.158579
TBP		INTERPRO	Interferon regulatory factor, conserved site	5.22308	0.37603
TBP		INTERPRO	Interferon regulatory factor	5.22308	0.37603
TBP		INTERPRO	Winged helix repressor DNA-binding	2.09447	0.556993
TBP		SMART	POU	4.05682	1.77387
TBP		INTERPRO	Fos transforming protein	5.96923	3.1842
TBP		INTERPRO	POU	3.7986	4.02093
TBP		INTERPRO	POU-specific	3.7986	4.02093
TBP		INTERPRO	Interferon regulatory factor-3	4.97436	8.1671
TBP		INTERPRO	SMAD domain-like	4.97436	8.1671
TBP	H1hesc	INTERPRO	bZIP transcription factor, bZIP-1	6.26528	9.98249e-07
TBP		SMART	BRLZ	4.02537	0.000148823
TBP		INTERPRO	Basic-leucine zipper (bZIP) transcription factor	3.68865	0.00112184
TBP		SMART	ETS	5.18895	0.0076887
TBP		INTERPRO	Ets	4.7549	0.0286952
TBP		INTERPRO	Winged helix repressor DNA-binding	2.26901	0.667226
TBP		INTERPRO	Fos transforming protein	7.60784	1.14603
TBP		SMART	SAM_PNT	5.18895	5.31811
TBP	Helas3	SMART	BRLZ	4.95069	1.40427e-14
TBP		INTERPRO	Basic-leucine zipper (bZIP) transcription factor	4.80992	1.11022e-13
TBP		INTERPRO	bZIP transcription factor, bZIP-1	5.87879	1.09303e-09
TBP		SMART	SH2	6.05085	0.0623745
TBP		INTERPRO	STAT transcription factor, DNA-binding, subdomain	5.87879	0.114815
TBP		INTERPRO	STAT transcription factor, DNA-binding	5.87879	0.114815
TBP		INTERPRO	STAT transcription factor, core	5.87879	0.114815
TBP		INTERPRO	STAT transcription factor, protein interaction	5.87879	0.114815
TBP		INTERPRO	SH2 motif	5.87879	0.114815
TBP		INTERPRO	STAT transcription factor, all-alpha	5.87879	0.114815
TBP		INTERPRO	EF-Hand type	5.14394	0.398008
TBP		SMART	ETS	3.4036	0.947727
TBP		INTERPRO	Ets	3.30682	1.8047
TBP		SMART	SAM_PNT	4.53814	2.51412
TBP		INTERPRO	Fos transforming protein	5.87879	3.26805
TBP		INTERPRO	Sterile alpha motif/pointed	4.40909	4.35993
TBP		INTERPRO	Basic leucine zipper	3.42929	7.22609
TBP		INTERPRO	Sterile alpha motif-type	3.91919	8.37593
TBP	Hepg2	SMART	BRLZ	4.93874	1.6897e-09
TBP		INTERPRO	Basic-leucine zipper (bZIP) transcription factor	4.65866	1.63449e-08
TBP		INTERPRO	bZIP transcription factor, bZIP-1	6.45949	5.94787e-08
TBP		INTERPRO	Fos transforming protein	7.32076	1.37732
TBP		SMART	ETS	3.39538	5.61745
TBP		SMART	SAM_PNT	4.85054	6.82679
TBP	K562	INTERPRO	bZIP transcription factor, bZIP-1	5.37024	9.89794e-08
TBP		SMART	ETS	5.29449	4.48052e-06
TBP		INTERPRO	Ets	4.99265	1.71735e-05
TBP		SMART	BRLZ	3.48382	6.27699e-05
TBP		INTERPRO	Basic-leucine zipper (bZIP) transcription factor	3.2852	0.000333494
TBP		SMART	SAM_PNT	5.29449	0.230782
TBP		INTERPRO	Sterile alpha motif/pointed	4.99265	0.501943
TBP		INTERPRO	Sterile alpha motif-type	4.43791	1.29547
TBP		INTERPRO	Winged helix repressor DNA-binding	1.90196	3.23905
TBP		INTERPRO	Fos transforming protein	5.70588	3.87398
TCF12	A549	SMART	BRLZ	3.80922	2.21432e-09
TCF12		INTERPRO	Basic-leucine zipper (bZIP) transcription factor	3.45811	5.52904e-08
TCF12		INTERPRO	bZIP transcription factor, bZIP-1	4.02768	8.63673e-05
TCF12		INTERPRO	Basic leucine zipper	3.42353	0.937188
TCF12		SMART	FH	3.09426	4.19847
TCF12		INTERPRO	Fos transforming protein	4.56471	9.34583
TCF12	Gm12878	SMART	IRF	7.76087	0.00161476
TCF12		INTERPRO	Interferon regulatory factor, conserved site	7.76	0.00252752
TCF12		INTERPRO	Interferon regulatory factor	7.76	0.00252752
TCF12		INTERPRO	Winged helix repressor DNA-binding	2.45053	0.129331
TCF12		SMART	ETS	4.36549	0.140608
TCF12		INTERPRO	Interferon regulatory factor-3	7.76	0.146609
TCF12		INTERPRO	SMAD domain-like	7.76	0.146609
TCF12		INTERPRO	Ets	4.365	0.2206
TCF12		INTERPRO	bZIP transcription factor, bZIP-1	4.10823	0.376172
TCF12		SMART	BRLZ	2.35178	8.77342
TCF12	H1hesc	SMART	POU	5.82517	0.213868
TCF12		INTERPRO	POU-specific	6.17273	0.226043
TCF12		INTERPRO	POU	6.17273	0.226043
TCF12		SMART	HMG	4.22485	4.88315
TCF12		INTERPRO	High mobility group, HMG1/HMG2	4.47692	5.50403
TCF12		INTERPRO	Helix-loop-helix DNA-binding	2.98461	9.08115
TCF12	Hepg2	INTERPRO	Basic-leucine zipper (bZIP) transcription factor	3.83112	2.25375e-12
TCF12		SMART	BRLZ	3.73485	2.27596e-12
TCF12		INTERPRO	bZIP transcription factor, bZIP-1	4.35955	2.46341e-07
TCF12		INTERPRO	Zinc finger, NHR/GATA-type	2.2945	0.0992335
TCF12		INTERPRO	Steroid hormone receptor	2.24206	0.404584
TCF12		SMART	HOLI	2.125	0.55418
TCF12		INTERPRO	Nuclear hormone receptor, ligand-binding, core	2.17977	0.623197
TCF12		INTERPRO	Nuclear hormone receptor, ligand-binding	2.17977	0.623197
TCF12		SMART	ZnF_C4	2.06429	1.2856
TCF12		INTERPRO	Zinc finger, nuclear hormone receptor-type	2.1175	1.47222
TCF12		INTERPRO	Vitamin D receptor	2.80257	5.18864
TCF12		INTERPRO	Basic leucine zipper	2.90637	7.87749
TCF7L2	Hct116	INTERPRO	bZIP transcription factor, bZIP-1	7.44245	5.84748e-09
TCF7L2		SMART	BRLZ	5.25455	2.79466e-07
TCF7L2		INTERPRO	Basic-leucine zipper (bZIP) transcription factor	4.34519	2.27606e-05
TCF7L2		INTERPRO	Fos transforming protein	8.43478	0.76013
TCF7L2		SMART	DWA	10.2	1.83835
TCF7L2		INTERPRO	CTF transcription factor/nuclear factor 1, conserved site	8.43478	5.47515
TCF7L2		INTERPRO	CTF transcription factor/nuclear factor 1, N-terminal	8.43478	5.47515
TCF7L2		INTERPRO	MAD homology 1, Dwarfin-type	8.43478	5.47515
TCF7L2		INTERPRO	CTF transcription factor/nuclear factor 1	8.43478	5.47515
TCF7L2	Hek293	SMART	HMG	4.87221	0.00127968
TCF7L2		INTERPRO	High mobility group, HMG1/HMG2	4.55983	0.00456401
TCF7L2		SMART	ZnF_GATA	5.75807	2.10807
TCF7L2		INTERPRO	Zinc finger, GATA-type	5.38889	4.64275
TCF7L2		SMART	BRLZ	2.09384	7.91399
TCF7L2	Helas3	SMART	BRLZ	4.54364	1.31571e-08
TCF7L2		INTERPRO	Basic-leucine zipper (bZIP) transcription factor	4.25705	1.30517e-07
TCF7L2		INTERPRO	bZIP transcription factor, bZIP-1	5.90264	2.48781e-07
TCF7L2		SMART	ZnF_GATA	7.14	0.967065
TCF7L2		INTERPRO	Zinc finger, GATA-type	6.68966	1.98584
TCF7L2		INTERPRO	Fos transforming protein	6.68966	1.98584
TCF7L2		INTERPRO	Basic leucine zipper	3.9023	3.70296
TCF7L2		INTERPRO	Transcription factor E2F/dimerisation partner (TDP)	5.57471	5.22225
TCF7L2	Hepg2	INTERPRO	Zinc finger, NHR/GATA-type	3.98849	3.05211e-09
TCF7L2		SMART	ZnF_C4	3.93684	1.00852e-07
TCF7L2		SMART	HOLI	3.82748	2.17076e-07
TCF7L2		INTERPRO	Zinc finger, nuclear hormone receptor-type	3.81071	4.71425e-07
TCF7L2		INTERPRO	Steroid hormone receptor	3.81071	4.71425e-07
TCF7L2		INTERPRO	Nuclear hormone receptor, ligand-binding	3.70486	1.00369e-06
TCF7L2		INTERPRO	Nuclear hormone receptor, ligand-binding, core	3.70486	1.00369e-06
TCF7L2		SMART	HMG	5.78138	2.18003e-05
TCF7L2		INTERPRO	High mobility group, HMG1/HMG2	5.59615	5.6175e-05
TCF7L2		SMART	FH	4.81781	0.00856097
TCF7L2		INTERPRO	Transcription factor, fork head, conserved site	4.66346	0.0194964
TCF7L2		INTERPRO	Transcription factor, fork head	4.66346	0.0194964
TCF7L2		INTERPRO	Retinoid X receptor	5.30469	0.316578
TCF7L2		SMART	ZnF_GATA	6.26316	1.50686
TCF7L2		INTERPRO	Zinc finger, GATA-type	6.0625	2.7704
TCF7L2	Mcf7	INTERPRO	bZIP transcription factor, bZIP-1	5.29241	1.23893e-07
TCF7L2		SMART	BRLZ	3.24546	0.000627776
TCF7L2		SMART	HMG	5.03461	0.00101324
TCF7L2		INTERPRO	Basic-leucine zipper (bZIP) transcription factor	3.06719	0.00292691
TCF7L2		INTERPRO	High mobility group, HMG1/HMG2	4.75808	0.00301921
TCF7L2		INTERPRO	Zinc finger, NHR/GATA-type	2.51564	0.160562
TCF7L2		SMART	ZnF_GATA	5.95	2.06265
TCF7L2		INTERPRO	Fos transforming protein	5.62319	4.02655
TCF7L2		INTERPRO	Zinc finger, GATA-type	5.62319	4.02655
TCF7L2	Panc1	INTERPRO	bZIP transcription factor, bZIP-1	5.34926	1.18358e-06
TCF7L2		SMART	BRLZ	3.60606	0.000905716
TCF7L2		INTERPRO	Basic-leucine zipper (bZIP) transcription factor	2.93939	0.0332132
TCF7L2		INTERPRO	Fos transforming protein	6.0625	3.02692
USF1	A549	INTERPRO	bZIP transcription factor, bZIP-1	7.32076	1.84852e-11
USF1		SMART	BRLZ	4.73295	5.25048e-09
USF1		INTERPRO	Basic-leucine zipper (bZIP) transcription factor	4.65866	1.63864e-08
USF1		INTERPRO	EF-Hand type	7.32076	0.00409125
USF1		SMART	SH2	7.4375	0.017766
USF1		INTERPRO	STAT transcription factor, all-alpha	7.32076	0.0297291
USF1		INTERPRO	STAT transcription factor, protein interaction	7.32076	0.0297291
USF1		INTERPRO	STAT transcription factor, core	7.32076	0.0297291
USF1		INTERPRO	SH2 motif	7.32076	0.0297291
USF1		INTERPRO	STAT transcription factor, DNA-binding	7.32076	0.0297291
USF1		INTERPRO	STAT transcription factor, DNA-binding, subdomain	7.32076	0.0297291
USF1		INTERPRO	Fos transforming protein	7.32076	1.38079
USF1		INTERPRO	Kelch related	7.32076	8.43731
USF1	Gm12878	INTERPRO	bZIP transcription factor, bZIP-1	7.10065	1.52886e-07
USF1		SMART	BRLZ	4.37879	9.72919e-06
USF1		INTERPRO	Basic-leucine zipper (bZIP) transcription factor	4.44175	1.49073e-05
USF1		INTERPRO	Fos transforming protein	8.62222	0.673256
USF1	H1hesc	SMART	HLH	3.23891	1.59645
USF1		INTERPRO	bZIP transcription factor, bZIP-1	4.56471	1.80271
USF1		SMART	BRLZ	3.04261	2.46865
USF1		INTERPRO	Basic helix-loop-helix dimerisation region bHLH	3.21843	2.80462
USF1		INTERPRO	Basic-leucine zipper (bZIP) transcription factor	3.02338	4.30504
USF1		INTERPRO	Fos transforming protein	8.86857	5.43673
USF1	Hepg2	INTERPRO	bZIP transcription factor, bZIP-1	4.19208	0.33485
USF1		SMART	HLH	3.00421	0.352515
USF1		INTERPRO	Basic helix-loop-helix dimerisation region bHLH	3.06517	0.453444
USF1		SMART	BRLZ	2.82213	0.661187
USF1		INTERPRO	Basic-leucine zipper (bZIP) transcription factor	2.87941	0.851098
USF1		INTERPRO	Helix-loop-helix DNA-binding	2.74097	8.46804
USF1	K562	SMART	BRLZ	4.10345	0.0315382
USF1		INTERPRO	Basic-leucine zipper (bZIP) transcription factor	4.04167	0.0645821
USF1		INTERPRO	bZIP transcription factor, bZIP-1	5.70588	0.117207
USF1		INTERPRO	Fos transforming protein	9.7	4.11942
YY1	A549	INTERPRO	bZIP transcription factor, bZIP-1	5.80963	2.95557e-06
YY1		SMART	ETS	6.04297	5.37951e-06
YY1		INTERPRO	Ets	5.73182	2.00925e-05
YY1		SMART	BRLZ	3.83144	9.78384e-05
YY1		INTERPRO	Basic-leucine zipper (bZIP) transcription factor	3.63416	0.000473074
YY1		INTERPRO	Winged helix repressor DNA-binding	2.22775	0.527941
YY1		INTERPRO	Fos transforming protein	7.05455	1.54195
YY1		SMART	SAM_PNT	4.64844	7.51814
YY1	Gm12878	SMART	SH2	9.15385	0.0045896
YY1		INTERPRO	STAT transcription factor, DNA-binding	9.02326	0.00761808
YY1		INTERPRO	SH2 motif	9.02326	0.00761808
YY1		INTERPRO	STAT transcription factor, all-alpha	9.02326	0.00761808
YY1		INTERPRO	STAT transcription factor, DNA-binding, subdomain	9.02326	0.00761808
YY1		INTERPRO	STAT transcription factor, core	9.02326	0.00761808
YY1		INTERPRO	STAT transcription factor, protein interaction	9.02326	0.00761808
YY1		INTERPRO	EF-Hand type	7.89535	0.0280072
YY1		SMART	BRLZ	3.32867	0.120829
YY1		INTERPRO	Basic-leucine zipper (bZIP) transcription factor	3.28118	0.225129
YY1		INTERPRO	bZIP transcription factor, bZIP-1	3.71546	5.64412
YY1	H1hesc	SMART	BRLZ	4.99301	0.00085723
YY1		INTERPRO	Basic-leucine zipper (bZIP) transcription factor	4.40909	0.00781943
YY1		INTERPRO	bZIP transcription factor, bZIP-1	4.99265	1.00325
YY1		INTERPRO	Transcription factor E2F/dimerisation partner (TDP)	8.08333	7.26105
YY1	Hct116	SMART	BRLZ	4.63636	7.6806e-09
YY1		INTERPRO	Basic-leucine zipper (bZIP) transcription factor	4.40909	5.7635e-08
YY1		INTERPRO	bZIP transcription factor, bZIP-1	6.11344	1.40491e-07
YY1		SMART	SH2	7.28571	0.0179925
YY1		INTERPRO	STAT transcription factor, protein interaction	6.92857	0.041237
YY1		INTERPRO	STAT transcription factor, all-alpha	6.92857	0.041237
YY1		INTERPRO	STAT transcription factor, core	6.92857	0.041237
YY1		INTERPRO	SH2 motif	6.92857	0.041237
YY1		INTERPRO	STAT transcription factor, DNA-binding	6.92857	0.041237
YY1		INTERPRO	STAT transcription factor, DNA-binding, subdomain	6.92857	0.041237
YY1		INTERPRO	EF-Hand type	6.0625	0.146748
YY1		INTERPRO	Fos transforming protein	6.92857	1.6931
YY1	Hepg2	SMART	HMG	6.86538	3.70777e-05
YY1		INTERPRO	High mobility group, HMG1/HMG2	6.43741	0.000119696
YY1		SMART	DWA	8.11364	4.26966
YY1		INTERPRO	CTF transcription factor/nuclear factor 1, N-terminal	7.60784	7.45313
YY1		INTERPRO	CTF transcription factor/nuclear factor 1	7.60784	7.45313
YY1		INTERPRO	MAD homology 1, Dwarfin-type	7.60784	7.45313
YY1		INTERPRO	CTF transcription factor/nuclear factor 1, conserved site	7.60784	7.45313
YY1	K562	SMART	BRLZ	5.15151	0.00780173
YY1		INTERPRO	Basic-leucine zipper (bZIP) transcription factor	4.19913	0.121061
YY1		INTERPRO	Transcription factor E2F/dimerisation partner (TDP)	11.5476	0.251143
YY1		INTERPRO	bZIP transcription factor, bZIP-1	5.70588	0.460533
YY1		INTERPRO	E2F Family	11.0857	2.66322
YY1	Nt2d1	SMART	BRLZ	3.09091	0.000186282
YY1		INTERPRO	bZIP transcription factor, bZIP-1	4.04468	0.000471935
YY1		INTERPRO	Basic-leucine zipper (bZIP) transcription factor	2.9766	0.000703072
YY1		SMART	ETS	4.14375	0.000756209
YY1		INTERPRO	Ets	3.99051	0.00204587
YY1		SMART	HMG	3.92308	0.0597405
YY1		INTERPRO	High mobility group, HMG1/HMG2	3.77799	0.136954
YY1		SMART	SH2	5.1	0.174856
YY1		INTERPRO	STAT transcription factor, DNA-binding, subdomain	4.91139	0.355244
YY1		INTERPRO	STAT transcription factor, all-alpha	4.91139	0.355244
YY1		INTERPRO	SH2 motif	4.91139	0.355244
YY1		INTERPRO	STAT transcription factor, protein interaction	4.91139	0.355244
YY1		INTERPRO	STAT transcription factor, core	4.91139	0.355244
YY1		INTERPRO	STAT transcription factor, DNA-binding	4.91139	0.355244
YY1		INTERPRO	Winged helix repressor DNA-binding	1.89562	1.15638
YY1		INTERPRO	EF-Hand type	4.29747	1.1873
YY1		SMART	SAM_PNT	3.825	5.43629
YY1		INTERPRO	Fos transforming protein	4.91139	6.76362
YY1	Sknshra	INTERPRO	bZIP transcription factor, bZIP-1	6.39059	7.61861e-07
YY1		SMART	BRLZ	3.93388	0.000216454
YY1		INTERPRO	Basic-leucine zipper (bZIP) transcription factor	3.76242	0.000842456
YY1		SMART	SH2	8.11364	0.00932383
YY1		INTERPRO	STAT transcription factor, DNA-binding	7.76	0.0203618
YY1		INTERPRO	STAT transcription factor, all-alpha	7.76	0.0203618
YY1		INTERPRO	STAT transcription factor, DNA-binding, subdomain	7.76	0.0203618
YY1		INTERPRO	STAT transcription factor, protein interaction	7.76	0.0203618
YY1		INTERPRO	STAT transcription factor, core	7.76	0.0203618
YY1		INTERPRO	SH2 motif	7.76	0.0203618
YY1		INTERPRO	EF-Hand type	6.79	0.0735707
YY1		INTERPRO	Fos transforming protein	7.76	1.07839
YY1		INTERPRO	Transcription factor E2F/dimerisation partner (TDP)	6.46667	2.90797
ZNF143	Gm12878	INTERPRO	Winged helix repressor DNA-binding	2.85456	2.17263e-05
ZNF143		SMART	ETS	5.27386	3.84315e-05
ZNF143		INTERPRO	Ets	5.08468	0.000100362
ZNF143		SMART	SH2	6.49091	0.0426731
ZNF143		INTERPRO	STAT transcription factor, core	6.25807	0.0809338
ZNF143		INTERPRO	STAT transcription factor, protein interaction	6.25807	0.0809338
ZNF143		INTERPRO	STAT transcription factor, all-alpha	6.25807	0.0809338
ZNF143		INTERPRO	STAT transcription factor, DNA-binding, subdomain	6.25807	0.0809338
ZNF143		INTERPRO	STAT transcription factor, DNA-binding	6.25807	0.0809338
ZNF143		INTERPRO	SH2 motif	6.25807	0.0809338
ZNF143		SMART	PAX	5.67955	0.150621
ZNF143		INTERPRO	Paired box protein, N-terminal	5.47581	0.283549
ZNF143		INTERPRO	EF-Hand type	5.47581	0.283549
ZNF143		SMART	SAM_PNT	4.86818	1.90462
ZNF143		INTERPRO	Sterile alpha motif/pointed	4.69355	3.37209
ZNF143		INTERPRO	Sterile alpha motif-type	4.17204	6.56801
ZNF143	H1hesc	SMART	SH2	35.7	6.66611e-08
ZNF143		INTERPRO	STAT transcription factor, protein interaction	27.7143	2.10448e-06
ZNF143		INTERPRO	STAT transcription factor, all-alpha	27.7143	2.10448e-06
ZNF143		INTERPRO	STAT transcription factor, core	27.7143	2.10448e-06
ZNF143		INTERPRO	SH2 motif	27.7143	2.10448e-06
ZNF143		INTERPRO	STAT transcription factor, DNA-binding, subdomain	27.7143	2.10448e-06
ZNF143		INTERPRO	STAT transcription factor, DNA-binding	27.7143	2.10448e-06
ZNF143		INTERPRO	EF-Hand type	24.25	8.28545e-06
ZNF143	Helas3	SMART	BRLZ	4.56768	2.55442e-07
ZNF143		INTERPRO	bZIP transcription factor, bZIP-1	5.50913	6.63622e-06
ZNF143		INTERPRO	Basic-leucine zipper (bZIP) transcription factor	3.85162	1.66656e-05
ZNF143		SMART	SH2	7.93333	0.0110471
ZNF143		INTERPRO	STAT transcription factor, all-alpha	6.68966	0.0528357
ZNF143		INTERPRO	SH2 motif	6.68966	0.0528357
ZNF143		INTERPRO	STAT transcription factor, DNA-binding	6.68966	0.0528357
ZNF143		INTERPRO	STAT transcription factor, core	6.68966	0.0528357
ZNF143		INTERPRO	STAT transcription factor, DNA-binding, subdomain	6.68966	0.0528357
ZNF143		INTERPRO	STAT transcription factor, protein interaction	6.68966	0.0528357
ZNF143		INTERPRO	EF-Hand type	5.85345	0.187055
ZNF143		INTERPRO	Fos transforming protein	6.68966	2.00512
ZNF143		INTERPRO	DNA-binding RFX	5.57471	5.2721
ZNF143		INTERPRO	Winged helix repressor DNA-binding	1.8778	9.48739
ZNF143	K562	SMART	SH2	12.3103	0.000615003
ZNF143		INTERPRO	STAT transcription factor, all-alpha	10.4865	0.00289564
ZNF143		INTERPRO	STAT transcription factor, DNA-binding	10.4865	0.00289564
ZNF143		INTERPRO	STAT transcription factor, core	10.4865	0.00289564
ZNF143		INTERPRO	STAT transcription factor, DNA-binding, subdomain	10.4865	0.00289564
ZNF143		INTERPRO	STAT transcription factor, protein interaction	10.4865	0.00289564
ZNF143		INTERPRO	SH2 motif	10.4865	0.00289564
ZNF143		INTERPRO	EF-Hand type	9.17568	0.0108019

## Sheet: S9-BP
Supplementary Table 9: List of Biological Processes (BP) found as enriched among the identified co-factors. The analysis was done using GOrilla tool (Eden et al. 2009).
TF	Cell line	GO-term	Biological Process (BP) name	Enrichment score	FDR
ATF3	A549	GO:0007346	regulation of mitotic cell cycle	6.13	1
ATF3	A549	GO:0065008	regulation of biological quality	2.82	1
ATF3	H1hesc	GO:0006953	acute-phase response	15.62	0.798
ATF3	H1hesc	GO:0002526	acute inflammatory response	12.5	0.968
ATF3	H1hesc	GO:0001889	liver development	8.01	0.635
ATF3	H1hesc	GO:0044281	small molecule metabolic process	5.79	1
ATF3	Hepg2	GO:0070345	negative regulation of fat cell proliferation	31.25	0.111
ATF3	Hepg2	GO:0070344	regulation of fat cell proliferation	31.25	0.0555
ATF3	Hepg2	GO:1900739	regulation of protein insertion into mitochondrial membrane involved in apoptotic signaling pathway	31.25	0.69
ATF3	Hepg2	GO:1900740	positive regulation of protein insertion into mitochondrial membrane involved in apoptotic signaling pathway	31.25	0.591
ATF3	Hepg2	GO:1901028	regulation of mitochondrial outer membrane permeabilization involved in apoptotic signaling pathway	31.25	0.517
ATF3	Hepg2	GO:1901030	positive regulation of mitochondrial outer membrane permeabilization involved in apoptotic signaling pathway	31.25	0.46
ATF3	Hepg2	GO:0000278	mitotic cell cycle	15.62	0.0584
ATF3	Hepg2	GO:0007049	cell cycle	11.36	0.196
ATF3	Hepg2	GO:0007219	Notch signaling pathway	9.62	0.328
ATF3	K562	GO:0000429	carbon catabolite regulation of transcription from RNA polymerase II promoter	34.09	0.111
ATF3	K562	GO:0000430	regulation of transcription from RNA polymerase II promoter by glucose	34.09	0.108
ATF3	K562	GO:0000432	positive regulation of transcription from RNA polymerase II promoter by glucose	34.09	0.105
ATF3	K562	GO:0000436	carbon catabolite activation of transcription from RNA polymerase II promoter	34.09	0.101
ATF3	K562	GO:0022037	metencephalon development	34.09	0.0986
ATF3	K562	GO:0045672	positive regulation of osteoclast differentiation	34.09	0.0958
ATF3	K562	GO:0019086	late viral transcription	34.09	0.0932
ATF3	K562	GO:0019083	viral transcription	34.09	0.0908
ATF3	K562	GO:0060430	lung saccule development	34.09	0.0884
ATF3	K562	GO:0060575	intestinal epithelial cell differentiation	34.09	0.0862
ATF3	K562	GO:0045766	positive regulation of angiogenesis	25.57	0.0546
ATF3	K562	GO:0002763	positive regulation of myeloid leukocyte differentiation	20.45	0.0671
ATF3	K562	GO:1904018	positive regulation of vasculature development	20.45	0.062
ATF3	K562	GO:0060395	SMAD protein signal transduction	20.45	0.0575
ATF3	K562	GO:0045639	positive regulation of myeloid cell differentiation	17.05	0.0589
ATF3	K562	GO:0032941	secretion by tissue	17.05	0.0881
ATF3	K562	GO:0031098	stress-activated protein kinase signaling cascade	17.05	0.0834
ATF3	K562	GO:0007595	lactation	17.05	0.0793
ATF3	K562	GO:0007612	learning	17.05	0.0755
ATF3	K562	GO:0051403	stress-activated MAPK cascade	17.05	0.0721
ATF3	K562	GO:0007589	body fluid secretion	17.05	0.0689
ATF3	K562	GO:0090287	regulation of cellular response to growth factor stimulus	14.61	0.0975
ATF3	K562	GO:0007611	learning or memory	13.64	0.049
ATF3	K562	GO:0003208	cardiac ventricle morphogenesis	12.78	0.0976
ATF3	K562	GO:0023014	signal transduction by protein phosphorylation	12.78	0.0955
ATF3	K562	GO:0000165	MAPK cascade	12.78	0.0934
ATF3	K562	GO:0050890	cognition	12.4	0.0531
ATF3	K562	GO:0046903	secretion	10.49	0.0697
ATF3	K562	GO:0050878	regulation of body fluid levels	10.23	0.018
ATF3	K562	GO:1902107	positive regulation of leukocyte differentiation	9.74	0.0904
ATF3	K562	GO:1903708	positive regulation of hemopoiesis	9.47	0.0806
ATF3	K562	GO:0009314	response to radiation	9.47	0.0605
ATF3	K562	GO:0002768	immune response-regulating cell surface receptor signaling pathway	9.09	0.0826
ATF3	K562	GO:0002253	activation of immune response	8.52	0.104
ATF3	K562	GO:0002757	immune response-activating signal transduction	8.52	0.1
ATF3	K562	GO:0042493	response to drug	6.6	0.0598
ATF3	K562	GO:0044765	single-organism transport	5.5	0.0951
ATF3	K562	GO:0009725	response to hormone	4.87	0.0523
ATF3	K562	GO:0009628	response to abiotic stimulus	4.87	0.0465
ATF3	K562	GO:0071495	cellular response to endogenous stimulus	4.45	0.109
ATF3	K562	GO:0003008	system process	4.45	0.105
ATF3	K562	GO:0065008	regulation of biological quality	3.69	0.0655
ATF3	K562	GO:0009719	response to endogenous stimulus	3.56	0.0851
ATF3	K562	GO:0048584	positive regulation of response to stimulus	3.46	0.0984
ATF3	K562	GO:0070887	cellular response to chemical stimulus	3.29	0.0727
ATF3	K562	GO:0051240	positive regulation of multicellular organismal process	2.98	0.0652
BHLHE40	Gm12878	GO:0032647	regulation of interferon-alpha production	10.71	0.254
BHLHE40	Gm12878	GO:0032727	positive regulation of interferon-alpha production	10.71	0.236
BHLHE40	Gm12878	GO:0032728	positive regulation of interferon-beta production	8.57	0.221
BHLHE40	Gm12878	GO:0051385	response to mineralocorticoid	8.57	0.189
BHLHE40	Gm12878	GO:0051412	response to corticosterone	8.57	0.166
BHLHE40	Gm12878	GO:0060333	interferon-gamma-mediated signaling pathway	8.04	0.0469
BHLHE40	Gm12878	GO:0032648	regulation of interferon-beta production	7.14	0.218
BHLHE40	Gm12878	GO:0071277	cellular response to calcium ion	6.7	0.359
BHLHE40	Gm12878	GO:0051592	response to calcium ion	6.7	0.269
BHLHE40	Gm12878	GO:0060337	type I interferon signaling pathway	6.43	0.153
BHLHE40	Gm12878	GO:0002761	regulation of myeloid leukocyte differentiation	4.59	0.22
BHLHE40	Gm12878	GO:0019221	cytokine-mediated signaling pathway	4.41	0.163
BHLHE40	Gm12878	GO:0009612	response to mechanical stimulus	4.17	0.187
BHLHE40	Gm12878	GO:0045637	regulation of myeloid cell differentiation	3.73	0.184
BHLHE40	Gm12878	GO:0043207	response to external biotic stimulus	3.25	0.246
BHLHE40	Gm12878	GO:0009607	response to biotic stimulus	3.15	0.163
BHLHE40	Gm12878	GO:0006464	cellular protein modification process	3.11	0.216
BHLHE40	Gm12878	GO:0036211	protein modification process	3.11	0.204
BHLHE40	Gm12878	GO:1903706	regulation of hemopoiesis	2.9	0.221
BHLHE40	Hepg2	GO:0032922	circadian regulation of gene expression	7.32	0.316
BHLHE40	Hepg2	GO:1901564	organonitrogen compound metabolic process	4.57	0.329
BHLHE40	Hepg2	GO:0033500	carbohydrate homeostasis	4.07	0.221
BHLHE40	Hepg2	GO:0042593	glucose homeostasis	4.07	0.177
BHLHE40	Hepg2	GO:0048608	reproductive structure development	2.86	0.391
BHLHE40	Hepg2	GO:0048878	chemical homeostasis	2.86	0.355
BHLHE40	Hepg2	GO:0003006	developmental process involved in reproduction	2.52	0.342
BHLHE40	Hepg2	GO:0044710	single-organism metabolic process	2.44	0.275
BHLHE40	Hepg2	GO:0044702	single organism reproductive process	2.22	0.192
BHLHE40	Hepg2	GO:0022414	reproductive process	2.12	0.268
BHLHE40	Hepg2	GO:0065008	regulation of biological quality	2.1	0.355
BHLHE40	K562	GO:0071773	cellular response to BMP stimulus	14.06	1
BHLHE40	K562	GO:0071772	response to BMP	14.06	0.893
BHLHE40	K562	GO:0030097	hemopoiesis	9.01	0.336
CEBPB	Gm12878	GO:0060333	interferon-gamma-mediated signaling pathway	8.33	0.000105
CEBPB	Gm12878	GO:0045075	regulation of interleukin-12 biosynthetic process	8.33	0.0224
CEBPB	Gm12878	GO:0038061	NIK/NF-kappaB signaling	8.33	0.0218
CEBPB	Gm12878	GO:0007249	I-kappaB kinase/NF-kappaB signaling	8.33	0.0213
CEBPB	Gm12878	GO:0032648	regulation of interferon-beta production	6.94	0.0232
CEBPB	Gm12878	GO:0043122	regulation of I-kappaB kinase/NF-kappaB signaling	6.94	0.0222
CEBPB	Gm12878	GO:0060337	type I interferon signaling pathway	6.67	0.00131
CEBPB	Gm12878	GO:0032735	positive regulation of interleukin-12 production	6.67	0.0635
CEBPB	Gm12878	GO:0032728	positive regulation of interferon-beta production	6.67	0.0624
CEBPB	Gm12878	GO:0032479	regulation of type I interferon production	6.06	0.00328
CEBPB	Gm12878	GO:0002221	pattern recognition receptor signaling pathway	6.06	0.00262
CEBPB	Gm12878	GO:0002224	toll-like receptor signaling pathway	6.06	0.00219
CEBPB	Gm12878	GO:0002756	MyD88-independent toll-like receptor signaling pathway	6.06	0.00187
CEBPB	Gm12878	GO:0034142	toll-like receptor 4 signaling pathway	6.06	0.00164
CEBPB	Gm12878	GO:0034138	toll-like receptor 3 signaling pathway	6.06	0.00146
CEBPB	Gm12878	GO:0035666	TRIF-dependent toll-like receptor signaling pathway	6.06	0.00131
CEBPB	Gm12878	GO:0032655	regulation of interleukin-12 production	5.95	0.0324
CEBPB	Gm12878	GO:0051607	defense response to virus	5.95	0.0317
CEBPB	Gm12878	GO:0032481	positive regulation of type I interferon production	5.83	0.00709
CEBPB	Gm12878	GO:0034162	toll-like receptor 9 signaling pathway	5.83	0.00658
CEBPB	Gm12878	GO:0048011	neurotrophin TRK receptor signaling pathway	5.56	0.0244
CEBPB	Gm12878	GO:0034166	toll-like receptor 10 signaling pathway	5.56	0.0235
CEBPB	Gm12878	GO:0002755	MyD88-dependent toll-like receptor signaling pathway	5.56	0.0226
CEBPB	Gm12878	GO:0034134	toll-like receptor 2 signaling pathway	5.56	0.0218
CEBPB	Gm12878	GO:0034146	toll-like receptor 5 signaling pathway	5.56	0.021
CEBPB	Gm12878	GO:0038179	neurotrophin signaling pathway	5.56	0.0203
CEBPB	Gm12878	GO:0038124	toll-like receptor TLR6:TLR2 signaling pathway	5.56	0.0197
CEBPB	Gm12878	GO:0038123	toll-like receptor TLR1:TLR2 signaling pathway	5.56	0.0191
CEBPB	Gm12878	GO:0019221	cytokine-mediated signaling pathway	5.39	0.000361
CEBPB	Gm12878	GO:0098542	defense response to other organism	4.55	0.0514
CEBPB	Gm12878	GO:0002218	activation of innate immune response	4.44	0.0219
CEBPB	Gm12878	GO:0002758	innate immune response-activating signal transduction	4.44	0.0206
CEBPB	Gm12878	GO:0002253	activation of immune response	4.17	0.0193
CEBPB	Gm12878	GO:0002757	immune response-activating signal transduction	4.17	0.0188
CEBPB	Gm12878	GO:0002252	immune effector process	4.17	0.036
CEBPB	Gm12878	GO:0007169	transmembrane receptor protein tyrosine kinase signaling pathway	4.17	0.0353
CEBPB	Gm12878	GO:0009615	response to virus	4.17	0.0347
CEBPB	Gm12878	GO:0045089	positive regulation of innate immune response	3.92	0.0249
CEBPB	Gm12878	GO:0031349	positive regulation of defense response	3.92	0.0244
CEBPB	Gm12878	GO:0001819	positive regulation of cytokine production	3.85	0.00237
CEBPB	Gm12878	GO:0045088	regulation of innate immune response	3.62	0.019
CEBPB	Gm12878	GO:0050778	positive regulation of immune response	3.57	0.0242
CEBPB	Gm12878	GO:0002764	immune response-regulating signaling pathway	3.51	0.0512
CEBPB	Gm12878	GO:0051707	response to other organism	3.51	0.0503
CEBPB	Gm12878	GO:0006915	apoptotic process	3.47	0.0245
CEBPB	Gm12878	GO:0012501	programmed cell death	3.47	0.0235
CEBPB	Gm12878	GO:0008219	cell death	3.33	0.0214
CEBPB	Gm12878	GO:0071407	cellular response to organic cyclic compound	3.26	0.0442
CEBPB	Gm12878	GO:0016265	death	3.21	0.0275
CEBPB	Gm12878	GO:0001817	regulation of cytokine production	3.12	0.0197
CEBPB	Gm12878	GO:0031347	regulation of defense response	2.96	0.0292
CEBPB	Gm12878	GO:0050776	regulation of immune response	2.94	0.0204
CEBPB	Gm12878	GO:0006952	defense response	2.72	0.0161
CEBPB	Gm12878	GO:0019538	protein metabolic process	2.45	0.0237
CEBPB	Gm12878	GO:0002682	regulation of immune system process	2.28	0.0214
CEBPB	Gm12878	GO:0002376	immune system process	2.23	0.0204
CEBPB	Gm12878	GO:0007166	cell surface receptor signaling pathway	2.03	0.0252
CEBPB	Gm12878	GO:0006950	response to stress	1.82	0.0658
CEBPB	Gm12878	GO:0006366	transcription from RNA polymerase II promoter	1.8	0.00629
CEBPB	Gm12878	GO:0007165	signal transduction	1.63	0.05
CEBPB	H1hesc	GO:0070345	negative regulation of fat cell proliferation	53.57	0.00883
CEBPB	H1hesc	GO:0070344	regulation of fat cell proliferation	53.57	0.00588
CEBPB	H1hesc	GO:1900739	regulation of protein insertion into mitochondrial membrane involved in apoptotic signaling pathway	53.57	0.263
CEBPB	H1hesc	GO:1900740	positive regulation of protein insertion into mitochondrial membrane involved in apoptotic signaling pathway	53.57	0.22
CEBPB	H1hesc	GO:1901028	regulation of mitochondrial outer membrane permeabilization involved in apoptotic signaling pathway	53.57	0.188
CEBPB	H1hesc	GO:1901030	positive regulation of mitochondrial outer membrane permeabilization involved in apoptotic signaling pathway	53.57	0.165
CEBPB	H1hesc	GO:0000278	mitotic cell cycle	26.79	0.0129
CEBPB	H1hesc	GO:0007049	cell cycle	19.48	0.015
CEBPB	H1hesc	GO:0032388	positive regulation of intracellular transport	14.61	0.273
CEBPB	H1hesc	GO:1903829	positive regulation of cellular protein localization	14.61	0.248
CEBPB	H1hesc	GO:0033043	regulation of organelle organization	8.93	0.196
CEBPB	Helas3	GO:0036499	PERK-mediated unfolded protein response	11.72	1
CEBPB	Helas3	GO:0034976	response to endoplasmic reticulum stress	7.81	1
CEBPB	K562	GO:0050817	coagulation	7.09	0.0222
CEBPB	K562	GO:0007596	blood coagulation	7.09	0.0111
CEBPB	K562	GO:0007599	hemostasis	6.45	0.0189
CTCF	Hct116	GO:1901741	positive regulation of myoblast fusion	37.5	1
CTCF	Hct116	GO:1901739	regulation of myoblast fusion	37.5	1
CTCF	Hct116	GO:0051149	positive regulation of muscle cell differentiation	14.06	1
CTCF	Hct116	GO:0010720	positive regulation of cell development	5.36	1
CTCF	Hek293	GO:0009719	response to endogenous stimulus	4.66	1
CTCF	Hepg2	GO:0030513	positive regulation of BMP signaling pathway	62.5	0.941
CTCF	Hepg2	GO:0090100	positive regulation of transmembrane receptor protein serine/threonine kinase signaling pathway	46.88	0.878
CTCF	Hepg2	GO:0030510	regulation of BMP signaling pathway	41.67	0.753
CTCF	Hepg2	GO:0090092	regulation of transmembrane receptor protein serine/threonine kinase signaling pathway	31.25	1
CTCF	Huvec	GO:0006974	cellular response to DNA damage stimulus	11.72	1
CTCF	K562	GO:0070345	negative regulation of fat cell proliferation	34.09	0.0832
CTCF	K562	GO:0070344	regulation of fat cell proliferation	34.09	0.0416
CTCF	K562	GO:1900739	regulation of protein insertion into mitochondrial membrane involved in apoptotic signaling pathway	34.09	0.575
CTCF	K562	GO:1900740	positive regulation of protein insertion into mitochondrial membrane involved in apoptotic signaling pathway	34.09	0.493
CTCF	K562	GO:1901028	regulation of mitochondrial outer membrane permeabilization involved in apoptotic signaling pathway	34.09	0.431
CTCF	K562	GO:1901030	positive regulation of mitochondrial outer membrane permeabilization involved in apoptotic signaling pathway	34.09	0.383
CTCF	K562	GO:0003334	keratinocyte development	34.09	0.345
CTCF	K562	GO:0072210	metanephric nephron development	34.09	0.314
CTCF	K562	GO:0000278	mitotic cell cycle	17.05	0.0393
CTCF	K562	GO:0007049	cell cycle	12.4	0.106
CTCF	K562	GO:0042127	regulation of cell proliferation	2.89	0.0642
CTCF	Mcf7	GO:0030097	hemopoiesis	14.42	1
CTCF	Sknshra	GO:1901522	positive regulation of transcription from RNA polymerase II promoter involved in cellular response to chemical stimulus	31.25	1
EP300	A549	GO:0007267	cell-cell signaling	13.39	1
EP300	A549	GO:0044700	single organism signaling	12.78	0.996
EP300	A549	GO:0023052	signaling	12.78	0.747
EP300	A549	GO:0007154	cell communication	11.36	0.222
EP300	Gm12878	GO:0060333	interferon-gamma-mediated signaling pathway	7.46	0.000314
EP300	Gm12878	GO:0002223	stimulatory C-type lectin receptor signaling pathway	7.31	0.00148
EP300	Gm12878	GO:0002220	innate immune response activating cell surface receptor signaling pathway	7.31	0.00144
EP300	Gm12878	GO:0032481	positive regulation of type I interferon production	6.82	0.000217
EP300	Gm12878	GO:0060337	type I interferon signaling pathway	6.82	0.000203
EP300	Gm12878	GO:0002260	lymphocyte homeostasis	6.82	0.041
EP300	Gm12878	GO:0071260	cellular response to mechanical stimulus	6.82	0.0405
EP300	Gm12878	GO:0032728	positive regulation of interferon-beta production	6.82	0.04
EP300	Gm12878	GO:0050851	antigen receptor-mediated signaling pathway	6.82	0.0396
EP300	Gm12878	GO:0002429	immune response-activating cell surface receptor signaling pathway	6.63	0.00089
EP300	Gm12878	GO:0032479	regulation of type I interferon production	6.2	0.000473
EP300	Gm12878	GO:0051607	defense response to virus	6.09	0.0201
EP300	Gm12878	GO:0050778	positive regulation of immune response	5.68	1.71e-06
EP300	Gm12878	GO:0002218	activation of innate immune response	5.68	0.000142
EP300	Gm12878	GO:0002758	innate immune response-activating signal transduction	5.68	0.00013
EP300	Gm12878	GO:0050871	positive regulation of B cell activation	5.68	0.00934
EP300	Gm12878	GO:0045089	positive regulation of innate immune response	5.51	7.93e-05
EP300	Gm12878	GO:0019221	cytokine-mediated signaling pathway	5.51	6.94e-05
EP300	Gm12878	GO:0031349	positive regulation of defense response	5.51	6.17e-05
EP300	Gm12878	GO:0002221	pattern recognition receptor signaling pathway	5.42	0.00437
EP300	Gm12878	GO:0002224	toll-like receptor signaling pathway	5.42	0.00427
EP300	Gm12878	GO:0002756	MyD88-independent toll-like receptor signaling pathway	5.42	0.00418
EP300	Gm12878	GO:0034142	toll-like receptor 4 signaling pathway	5.42	0.0041
EP300	Gm12878	GO:0034138	toll-like receptor 3 signaling pathway	5.42	0.00401
EP300	Gm12878	GO:0035666	TRIF-dependent toll-like receptor signaling pathway	5.42	0.00393
EP300	Gm12878	GO:0002253	activation of immune response	5.33	0.000225
EP300	Gm12878	GO:0002757	immune response-activating signal transduction	5.33	0.000212
EP300	Gm12878	GO:0034162	toll-like receptor 9 signaling pathway	5.11	0.0181
EP300	Gm12878	GO:0050864	regulation of B cell activation	5.11	0.0179
EP300	Gm12878	GO:0045088	regulation of innate immune response	4.82	5e-05
EP300	Gm12878	GO:0071375	cellular response to peptide hormone stimulus	4.65	0.032
EP300	Gm12878	GO:0002697	regulation of immune effector process	4.65	0.0316
EP300	Gm12878	GO:0098542	defense response to other organism	4.65	0.0312
EP300	Gm12878	GO:0002764	immune response-regulating signaling pathway	4.49	0.00109
EP300	Gm12878	GO:0050776	regulation of immune response	4.26	5.84e-06
EP300	Gm12878	GO:0001819	positive regulation of cytokine production	4.26	0.000151
EP300	Gm12878	GO:1901699	cellular response to nitrogen compound	4.26	0.000755
EP300	Gm12878	GO:0002696	positive regulation of leukocyte activation	4.26	0.00924
EP300	Gm12878	GO:0071345	cellular response to cytokine stimulus	4.26	0.00908
EP300	Gm12878	GO:0051251	positive regulation of lymphocyte activation	4.26	0.00893
EP300	Gm12878	GO:0009615	response to virus	4.26	0.0221
EP300	Gm12878	GO:0051249	regulation of lymphocyte activation	4.08	0.00108
EP300	Gm12878	GO:0002684	positive regulation of immune system process	4.02	1.11e-05
EP300	Gm12878	GO:0050867	positive regulation of cell activation	4.01	0.0142
EP300	Gm12878	GO:0002768	immune response-regulating cell surface receptor signaling pathway	3.98	0.0335
EP300	Gm12878	GO:0006915	apoptotic process	3.91	0.00159
EP300	Gm12878	GO:0012501	programmed cell death	3.91	0.00155
EP300	Gm12878	GO:0071417	cellular response to organonitrogen compound	3.84	0.0094
EP300	Gm12878	GO:0045087	innate immune response	3.75	0.00247
EP300	Gm12878	GO:0008219	cell death	3.75	0.00241
EP300	Gm12878	GO:0045580	regulation of T cell differentiation	3.73	0.0482
EP300	Gm12878	GO:0002694	regulation of leukocyte activation	3.61	0.00372
EP300	Gm12878	GO:0016265	death	3.61	0.00364
EP300	Gm12878	GO:0051707	response to other organism	3.59	0.0318
EP300	Gm12878	GO:0031347	regulation of defense response	3.57	0.00091
EP300	Gm12878	GO:0048534	hematopoietic or lymphoid organ development	3.55	0.00843
EP300	Gm12878	GO:0050865	regulation of cell activation	3.47	0.00473
EP300	Gm12878	GO:0001817	regulation of cytokine production	3.46	0.00121
EP300	Gm12878	GO:0002682	regulation of immune system process	3.3	1.74e-06
EP300	Gm12878	GO:0006952	defense response	3.15	0.000271
EP300	Gm12878	GO:0043207	response to external biotic stimulus	3.1	0.00745
EP300	Gm12878	GO:0034097	response to cytokine	3.07	0.046
EP300	Gm12878	GO:0009607	response to biotic stimulus	3.01	0.009
EP300	Gm12878	GO:1903706	regulation of hemopoiesis	2.99	0.00539
EP300	Gm12878	GO:0080134	regulation of response to stress	2.89	0.000459
EP300	Gm12878	GO:0002376	immune system process	2.88	1.34e-05
EP300	Gm12878	GO:0050678	regulation of epithelial cell proliferation	2.84	0.0464
EP300	Gm12878	GO:1901698	response to nitrogen compound	2.77	0.0114
EP300	Gm12878	GO:0035556	intracellular signal transduction	2.56	0.00908
EP300	Gm12878	GO:0006955	immune response	2.56	0.0411
EP300	Gm12878	GO:0007166	cell surface receptor signaling pathway	2.49	0.000124
EP300	Gm12878	GO:0048584	positive regulation of response to stimulus	2.47	0.00109
EP300	Gm12878	GO:0070887	cellular response to chemical stimulus	2.36	0.000449
EP300	Gm12878	GO:0019538	protein metabolic process	2.34	0.0372
EP300	Gm12878	GO:0006950	response to stress	2.22	0.000487
EP300	Gm12878	GO:0042221	response to chemical	2.15	0.000125
EP300	Gm12878	GO:0051240	positive regulation of multicellular organismal process	2.15	0.000457
EP300	Gm12878	GO:0008284	positive regulation of cell proliferation	2.13	0.03
EP300	Gm12878	GO:0071310	cellular response to organic substance	2.04	0.0456
EP300	Gm12878	GO:0048583	regulation of response to stimulus	2.01	0.000588
EP300	Gm12878	GO:0051716	cellular response to stimulus	1.95	0.00378
EP300	Gm12878	GO:0010033	response to organic substance	1.84	0.03
EP300	Gm12878	GO:0050896	response to stimulus	1.75	0.000749
EP300	Gm12878	GO:0007165	signal transduction	1.73	0.00889
EP300	Gm12878	GO:0051239	regulation of multicellular organismal process	1.71	0.00111
EP300	Gm12878	GO:0045595	regulation of cell differentiation	1.7	0.0161
EP300	Gm12878	GO:0006366	transcription from RNA polymerase II promoter	1.66	0.0269
EP300	Gm12878	GO:0048522	positive regulation of cellular process	1.25	0.00956
EP300	Gm12878	GO:0048518	positive regulation of biological process	1.22	0.0269
EP300	H1hesc	GO:0060174	limb bud formation	12.1	1
EP300	Helas3	GO:0008637	apoptotic mitochondrial changes	31.25	0.591
EP300	Helas3	GO:0070059	intrinsic apoptotic signaling pathway in response to endoplasmic reticulum stress	31.25	0.517
EP300	Helas3	GO:0034976	response to endoplasmic reticulum stress	15.62	0.175
EP300	Helas3	GO:1990440	positive regulation of transcription from RNA polymerase II promoter in response to endoplasmic reticulum stress	15.62	0.42
EP300	Helas3	GO:0043620	regulation of DNA-templated transcription in response to stress	10.42	0.578
EP300	Helas3	GO:0043618	regulation of transcription from RNA polymerase II promoter in response to stress	10.42	0.385
EP300	Helas3	GO:0001889	liver development	9.62	0.41
EP300	Helas3	GO:0001819	positive regulation of cytokine production	6.01	0.452
EP300	Hepg2	GO:0051385	response to mineralocorticoid	14.42	0.000601
EP300	Hepg2	GO:0051412	response to corticosterone	14.42	0.000534
EP300	Hepg2	GO:0006805	xenobiotic metabolic process	14.42	0.0386
EP300	Hepg2	GO:0035902	response to immobilization stress	14.42	0.0375
EP300	Hepg2	GO:0048145	regulation of fibroblast proliferation	10.3	0.00573
EP300	Hepg2	GO:0048146	positive regulation of fibroblast proliferation	9.62	0.0345
EP300	Hepg2	GO:0032570	response to progesterone	9.01	0.0111
EP300	Hepg2	GO:0071277	cellular response to calcium ion	9.01	0.0106
EP300	Hepg2	GO:0051592	response to calcium ion	9.01	0.0101
EP300	Hepg2	GO:0007565	female pregnancy	8.24	0.0584
EP300	Hepg2	GO:0051384	response to glucocorticoid	8.01	0.0192
EP300	Hepg2	GO:0031960	response to corticosteroid	8.01	0.0185
EP300	Hepg2	GO:0014074	response to purine-containing compound	6.79	0.00124
EP300	Hepg2	GO:0071248	cellular response to metal ion	6.66	0.014
EP300	Hepg2	GO:1901654	response to ketone	6.66	0.0134
EP300	Hepg2	GO:0009612	response to mechanical stimulus	6.41	0.00194
EP300	Hepg2	GO:0051591	response to cAMP	6.31	0.00655
EP300	Hepg2	GO:0046683	response to organophosphorus	6.31	0.00618
EP300	Hepg2	GO:0043401	steroid hormone mediated signaling pathway	6.18	2.59e-07
EP300	Hepg2	GO:0071241	cellular response to inorganic substance	6.18	0.02
EP300	Hepg2	GO:0097305	response to alcohol	6.07	0.00271
EP300	Hepg2	GO:0031668	cellular response to extracellular stimulus	6.01	0.0589
EP300	Hepg2	GO:0009755	hormone-mediated signaling pathway	5.85	3.51e-07
EP300	Hepg2	GO:0030522	intracellular receptor signaling pathway	5.69	3.75e-07
EP300	Hepg2	GO:0010038	response to metal ion	5.09	0.0511
EP300	Hepg2	GO:0006629	lipid metabolic process	4.81	0.0288
EP300	Hepg2	GO:0006367	transcription initiation from RNA polymerase II promoter	4.16	5.25e-05
EP300	Hepg2	GO:0006352	DNA-templated transcription, initiation	4.08	5.67e-05
EP300	Hepg2	GO:0048545	response to steroid hormone	3.98	0.0383
EP300	Hepg2	GO:0010467	gene expression	3.93	8.44e-05
EP300	Hepg2	GO:0042493	response to drug	3.72	0.0529
EP300	Hepg2	GO:0051090	regulation of sequence-specific DNA binding transcription factor activity	3.61	0.0598
EP300	Hepg2	GO:0014070	response to organic cyclic compound	3.46	0.00602
EP300	Hepg2	GO:0010243	response to organonitrogen compound	3.42	0.0449
EP300	Hepg2	GO:0032870	cellular response to hormone stimulus	3.39	0.0846
EP300	Hepg2	GO:0033993	response to lipid	3.35	0.00352
EP300	Hepg2	GO:1901698	response to nitrogen compound	3.25	0.0594
EP300	Hepg2	GO:0071495	cellular response to endogenous stimulus	3.14	0.043
EP300	Hepg2	GO:1901700	response to oxygen-containing compound	3.05	0.00191
EP300	Hepg2	GO:0009725	response to hormone	2.94	0.0582
EP300	Hepg2	GO:0009628	response to abiotic stimulus	2.94	0.0569
EP300	Hepg2	GO:0003006	developmental process involved in reproduction	2.74	0.0598
EP300	Hepg2	GO:0022414	reproductive process	2.64	0.00858
EP300	Hepg2	GO:0071310	cellular response to organic substance	2.64	0.0283
EP300	Hepg2	GO:0044710	single-organism metabolic process	2.64	0.0724
EP300	Hepg2	GO:0009719	response to endogenous stimulus	2.58	0.0546
EP300	Hepg2	GO:0010033	response to organic substance	2.4	0.00622
EP300	Hepg2	GO:0007165	signal transduction	2.3	0.000186
EP300	Hepg2	GO:0042221	response to chemical	2.13	0.0247
EP300	Hepg2	GO:0051716	cellular response to stimulus	2.12	0.0427
EP300	T47d	GO:0022037	metencephalon development	31.25	1
FOS	Gm12878	GO:0007219	Notch signaling pathway	4.71	0.168
FOS	Helas3	GO:0007267	cell-cell signaling	4.63	1
FOS	Helas3	GO:0044700	single organism signaling	4.42	0.813
FOS	Helas3	GO:0023052	signaling	4.42	0.542
FOS	Helas3	GO:0009653	anatomical structure morphogenesis	1.73	0.766
FOS	Huvec	GO:0032647	regulation of interferon-alpha production	10.71	0.413
FOS	Huvec	GO:0032727	positive regulation of interferon-alpha production	10.71	0.367
FOS	Huvec	GO:0060333	interferon-gamma-mediated signaling pathway	9.38	0.000565
FOS	Huvec	GO:0032728	positive regulation of interferon-beta production	8.57	0.265
FOS	Huvec	GO:0060337	type I interferon signaling pathway	7.5	0.00492
FOS	Huvec	GO:0032648	regulation of interferon-beta production	7.14	0.371
FOS	Huvec	GO:0019221	cytokine-mediated signaling pathway	6.3	0.000744
FOS	Huvec	GO:0032481	positive regulation of type I interferon production	5.36	0.383
FOS	Huvec	GO:0045088	regulation of innate immune response	3.73	0.289
FOS	Huvec	GO:0050776	regulation of immune response	3.15	0.271
FOS	Huvec	GO:0006952	defense response	3.03	0.0598
FOS	K562	GO:0070345	negative regulation of fat cell proliferation	34.09	0.0832
FOS	K562	GO:0070344	regulation of fat cell proliferation	34.09	0.0416
FOS	K562	GO:1900739	regulation of protein insertion into mitochondrial membrane involved in apoptotic signaling pathway	34.09	0.575
FOS	K562	GO:1900740	positive regulation of protein insertion into mitochondrial membrane involved in apoptotic signaling pathway	34.09	0.493
FOS	K562	GO:1901028	regulation of mitochondrial outer membrane permeabilization involved in apoptotic signaling pathway	34.09	0.431
FOS	K562	GO:1901030	positive regulation of mitochondrial outer membrane permeabilization involved in apoptotic signaling pathway	34.09	0.383
FOS	K562	GO:1901724	positive regulation of cell proliferation involved in kidney development	34.09	0.345
FOS	K562	GO:0000278	mitotic cell cycle	17.05	0.0393
FOS	K562	GO:0007049	cell cycle	12.4	0.133
FOS	K562	GO:0007219	Notch signaling pathway	10.49	0.223
JUN	Mcf10a	GO:0031100	organ regeneration	17.58	1
JUN	Gm12878	GO:0055072	iron ion homeostasis	37.5	0.0605
JUN	Gm12878	GO:0006879	cellular iron ion homeostasis	37.5	0.282
JUN	Gm12878	GO:0046916	cellular transition metal ion homeostasis	37.5	0.257
JUN	Gm12878	GO:0055076	transition metal ion homeostasis	28.12	0.0597
JUN	Gm12878	GO:0098771	inorganic ion homeostasis	16.67	0.0672
JUN	Gm12878	GO:0055080	cation homeostasis	16.67	0.0448
JUN	Gm12878	GO:0006873	cellular ion homeostasis	16.07	0.286
JUN	Gm12878	GO:0030003	cellular cation homeostasis	16.07	0.25
JUN	Gm12878	GO:0060249	anatomical structure homeostasis	16.07	0.222
JUN	Gm12878	GO:0055065	metal ion homeostasis	14.06	0.263
JUN	Gm12878	GO:0050801	ion homeostasis	13.64	0.0686
JUN	Gm12878	GO:0042592	homeostatic process	5	0.231
JUN	H1hesc	GO:0006260	DNA replication	9.68	0.804
JUN	Helas3	GO:0045672	positive regulation of osteoclast differentiation	53.57	0.0507
JUN	Helas3	GO:0002763	positive regulation of myeloid leukocyte differentiation	42.86	0.000943
JUN	Helas3	GO:0045639	positive regulation of myeloid cell differentiation	26.79	0.00432
JUN	Helas3	GO:0031098	stress-activated protein kinase signaling cascade	26.79	0.0287
JUN	Helas3	GO:0051403	stress-activated MAPK cascade	26.79	0.0265
JUN	Helas3	GO:0023014	signal transduction by protein phosphorylation	20.09	0.0432
JUN	Helas3	GO:0000165	MAPK cascade	20.09	0.0413
JUN	Helas3	GO:0034166	toll-like receptor 10 signaling pathway	17.86	0.0523
JUN	Helas3	GO:0002755	MyD88-dependent toll-like receptor signaling pathway	17.86	0.0504
JUN	Helas3	GO:0034134	toll-like receptor 2 signaling pathway	17.86	0.0487
JUN	Helas3	GO:0034146	toll-like receptor 5 signaling pathway	17.86	0.0471
JUN	Helas3	GO:0038124	toll-like receptor TLR6:TLR2 signaling pathway	17.86	0.0456
JUN	Helas3	GO:0038123	toll-like receptor TLR1:TLR2 signaling pathway	17.86	0.0441
JUN	Helas3	GO:0034162	toll-like receptor 9 signaling pathway	16.07	0.0556
JUN	Helas3	GO:0007611	learning or memory	16.07	0.0541
JUN	Helas3	GO:0002761	regulation of myeloid leukocyte differentiation	15.31	0.0254
JUN	Helas3	GO:1902107	positive regulation of leukocyte differentiation	15.31	0.0222
JUN	Helas3	GO:0000302	response to reactive oxygen species	14.61	0.0682
JUN	Helas3	GO:0002221	pattern recognition receptor signaling pathway	14.61	0.0666
JUN	Helas3	GO:0002224	toll-like receptor signaling pathway	14.61	0.065
JUN	Helas3	GO:0002756	MyD88-independent toll-like receptor signaling pathway	14.61	0.0635
JUN	Helas3	GO:0034142	toll-like receptor 4 signaling pathway	14.61	0.062
JUN	Helas3	GO:0034138	toll-like receptor 3 signaling pathway	14.61	0.0607
JUN	Helas3	GO:0038093	Fc receptor signaling pathway	14.61	0.0593
JUN	Helas3	GO:0038095	Fc-epsilon receptor signaling pathway	14.61	0.0581
JUN	Helas3	GO:0050890	cognition	14.61	0.0569
JUN	Helas3	GO:0035666	TRIF-dependent toll-like receptor signaling pathway	14.61	0.0557
JUN	Helas3	GO:0006468	protein phosphorylation	14.29	0.0241
JUN	Helas3	GO:0016310	phosphorylation	13.39	0.029
JUN	Helas3	GO:0034097	response to cytokine	12.86	0.000702
JUN	Helas3	GO:0045089	positive regulation of innate immune response	12.61	0.0277
JUN	Helas3	GO:0031349	positive regulation of defense response	12.61	0.0259
JUN	Helas3	GO:1903708	positive regulation of hemopoiesis	11.9	0.0294
JUN	Helas3	GO:0045088	regulation of innate immune response	11.65	0.00951
JUN	Helas3	GO:0006796	phosphate-containing compound metabolic process	11.28	0.0351
JUN	Helas3	GO:0006793	phosphorus metabolic process	11.28	0.0333
JUN	Helas3	GO:0050778	positive regulation of immune response	10.2	0.0406
JUN	Helas3	GO:0045637	regulation of myeloid cell differentiation	9.32	0.0449
JUN	Helas3	GO:0031347	regulation of defense response	8.64	0.0257
JUN	Helas3	GO:0045087	innate immune response	8.57	0.055
JUN	Helas3	GO:0010035	response to inorganic substance	7.94	0.0572
JUN	Helas3	GO:0050776	regulation of immune response	7.88	0.0267
JUN	Helas3	GO:1902105	regulation of leukocyte differentiation	7.39	0.0734
JUN	Helas3	GO:0048511	rhythmic process	7.39	0.072
JUN	Helas3	GO:0006955	immune response	6.7	0.0408
JUN	Helas3	GO:0035556	intracellular signal transduction	6.43	0.0197
JUN	Helas3	GO:0006952	defense response	5.82	0.051
JUN	Helas3	GO:0051704	multi-organism process	5.82	0.0495
JUN	Helas3	GO:0002376	immune system process	5.28	0.00748
JUN	Helas3	GO:0080134	regulation of response to stress	5.05	0.0687
JUN	Helas3	GO:0070887	cellular response to chemical stimulus	3.87	0.0659
JUN	Helas3	GO:0010033	response to organic substance	3.68	0.0244
JUN	Helas3	GO:0042221	response to chemical	3.26	0.0411
JUN	Hepg2	GO:1901700	response to oxygen-containing compound	5.28	0.952
JUN	K562	GO:0070345	negative regulation of fat cell proliferation	28.85	0.144
JUN	K562	GO:0070344	regulation of fat cell proliferation	28.85	0.0721
JUN	K562	GO:1904018	positive regulation of vasculature development	17.31	0.277
JUN	K562	GO:0000278	mitotic cell cycle	14.42	0.0837
JUN	K562	GO:0007049	cell cycle	10.49	0.279
JUND	Gm12878	GO:0060333	interferon-gamma-mediated signaling pathway	7.65	0.00011
JUND	Gm12878	GO:0007259	JAK-STAT cascade	7.65	0.00414
JUND	Gm12878	GO:0060338	regulation of type I interferon-mediated signaling pathway	7.65	0.144
JUND	Gm12878	GO:0060397	JAK-STAT cascade involved in growth hormone signaling pathway	7.65	0.128
JUND	Gm12878	GO:0060337	type I interferon signaling pathway	6.89	7.4e-05
JUND	Gm12878	GO:0019221	cytokine-mediated signaling pathway	6.3	1.56e-07
JUND	Gm12878	GO:0051607	defense response to virus	5.47	0.216
JUND	Gm12878	GO:0002697	regulation of immune effector process	4.87	0.0697
JUND	Gm12878	GO:0098542	defense response to other organism	4.87	0.0598
JUND	Gm12878	GO:0032481	positive regulation of type I interferon production	4.59	0.229
JUND	Gm12878	GO:0007166	cell surface receptor signaling pathway	2.05	0.0779
JUND	H1hesc	GO:0008340	determination of adult lifespan	31.25	1
JUND	H1hesc	GO:1901983	regulation of protein acetylation	18.75	1
JUND	Helas3	GO:0001759	organ induction	62.5	0.941
JUND	Helas3	GO:0060272	embryonic skeletal joint morphogenesis	41.67	0.934
JUND	Helas3	GO:0009954	proximal/distal pattern formation	14.42	1
JUND	Hepg2	GO:0055088	lipid homeostasis	7.89	0.604
JUND	Hepg2	GO:0033500	carbohydrate homeostasis	6.58	0.412
JUND	Hepg2	GO:0042593	glucose homeostasis	6.58	0.206
JUND	Hepg2	GO:0048878	chemical homeostasis	4.32	0.606
JUND	Hepg2	GO:0042592	homeostatic process	3.51	0.705
JUND	Hepg2	GO:0003006	developmental process involved in reproduction	3.06	0.649
JUND	Huvec	GO:0045333	cellular respiration	31.25	1
JUND	Huvec	GO:0002223	stimulatory C-type lectin receptor signaling pathway	13.39	1
JUND	Huvec	GO:0002220	innate immune response activating cell surface receptor signaling pathway	13.39	1
JUND	Huvec	GO:0050778	positive regulation of immune response	7.44	0.91
JUND	K562	GO:0045766	positive regulation of angiogenesis	21.63	0.565
JUND	K562	GO:0035162	embryonic hemopoiesis	21.63	0.283
JUND	K562	GO:1904018	positive regulation of vasculature development	17.31	0.462
JUND	K562	GO:0001776	leukocyte homeostasis	14.42	0.543
JUND	K562	GO:0043627	response to estrogen	8.88	0.581
JUND	Gm12878	GO:0032647	regulation of interferon-alpha production	18.75	0.0958
JUND	Gm12878	GO:0032727	positive regulation of interferon-alpha production	18.75	0.0821
JUND	Gm12878	GO:0060333	interferon-gamma-mediated signaling pathway	16.41	1.35e-05
JUND	Gm12878	GO:0032728	positive regulation of interferon-beta production	15	0.0317
JUND	Gm12878	GO:0060337	type I interferon signaling pathway	13.12	9.52e-05
JUND	Gm12878	GO:0032648	regulation of interferon-beta production	12.5	0.0735
JUND	Gm12878	GO:0019221	cytokine-mediated signaling pathway	8.82	0.000382
JUND	Gm12878	GO:0002252	immune effector process	6.7	0.208
JUND	H1hesc	GO:0031647	regulation of protein stability	7.94	1
JUND	Helas3	GO:0006094	gluconeogenesis	53.57	1
JUND	Helas3	GO:0061394	regulation of transcription from RNA polymerase II promoter in response to arsenic-containing substance	53.57	0.659
JUND	Helas3	GO:0016051	carbohydrate biosynthetic process	53.57	0.439
JUND	Helas3	GO:0019319	hexose biosynthetic process	53.57	0.329
JUND	Helas3	GO:0046364	monosaccharide biosynthetic process	53.57	0.263
JUND	Hepg2	GO:0060174	limb bud formation	10.71	0.66
JUND	Hepg2	GO:0060441	epithelial tube branching involved in lung morphogenesis	8.57	0.663
JUND	Hepg2	GO:0031018	endocrine pancreas development	5.36	1
JUND	Hepg2	GO:0033500	carbohydrate homeostasis	4.17	0.748
JUND	Hepg2	GO:0042593	glucose homeostasis	4.17	0.561
JUND	K562	GO:0070345	negative regulation of fat cell proliferation	15.62	1
JUND	K562	GO:0070344	regulation of fat cell proliferation	15.62	0.51
JUND	K562	GO:0000278	mitotic cell cycle	7.81	1
JUND	Sknsh	GO:0007259	JAK-STAT cascade	8.93	0.00622
JUND	Sknsh	GO:0060397	JAK-STAT cascade involved in growth hormone signaling pathway	8.93	0.304
JUND	Sknsh	GO:0042542	response to hydrogen peroxide	5.58	0.671
JUND	Sknsh	GO:0000302	response to reactive oxygen species	4.87	0.619
JUND	Sknsh	GO:0006979	response to oxidative stress	3.91	0.633
MAFK	H1hesc	GO:0070345	negative regulation of fat cell proliferation	46.88	0.0141
MAFK	H1hesc	GO:0070344	regulation of fat cell proliferation	46.88	0.00942
MAFK	H1hesc	GO:1900739	regulation of protein insertion into mitochondrial membrane involved in apoptotic signaling pathway	46.88	0.176
MAFK	H1hesc	GO:1900740	positive regulation of protein insertion into mitochondrial membrane involved in apoptotic signaling pathway	46.88	0.16
MAFK	H1hesc	GO:1901028	regulation of mitochondrial outer membrane permeabilization involved in apoptotic signaling pathway	46.88	0.146
MAFK	H1hesc	GO:1901030	positive regulation of mitochondrial outer membrane permeabilization involved in apoptotic signaling pathway	46.88	0.135
MAFK	H1hesc	GO:0044843	cell cycle G1/S phase transition	35.16	0.028
MAFK	H1hesc	GO:0000082	G1/S transition of mitotic cell cycle	35.16	0.0224
MAFK	H1hesc	GO:0000278	mitotic cell cycle	23.44	0.0257
MAFK	H1hesc	GO:0044772	mitotic cell cycle phase transition	20.09	0.119
MAFK	H1hesc	GO:0044770	cell cycle phase transition	20.09	0.105
MAFK	H1hesc	GO:0007049	cell cycle	17.05	0.0196
MAFK	H1hesc	GO:2001235	positive regulation of apoptotic signaling pathway	14.06	0.225
MAFK	H1hesc	GO:1903047	mitotic cell cycle process	11.03	0.115
MAFK	Hepg2	GO:0040020	regulation of meiotic nuclear division	46.88	1
MAFK	Hepg2	GO:0045836	positive regulation of meiotic nuclear division	46.88	0.878
MAFK	Hepg2	GO:0090427	activation of meiosis	46.88	0.585
MAFK	Hepg2	GO:0051446	positive regulation of meiotic cell cycle	46.88	0.439
MAFK	Hepg2	GO:0051445	regulation of meiotic cell cycle	46.88	0.351
MAFK	Hepg2	GO:0035880	embryonic nail plate morphogenesis	46.88	0.293
MAFK	Hepg2	GO:0071407	cellular response to organic cyclic compound	8.15	0.406
MAFK	Imr90	GO:0045945	positive regulation of transcription from RNA polymerase III promoter	41.67	1
MAFK	K562	GO:0051385	response to mineralocorticoid	20.83	0.000626
MAFK	K562	GO:0051412	response to corticosterone	20.83	0.000313
MAFK	K562	GO:0032570	response to progesterone	13.02	0.00401
MAFK	K562	GO:0071277	cellular response to calcium ion	13.02	0.00356
MAFK	K562	GO:0051592	response to calcium ion	13.02	0.00321
MAFK	K562	GO:0007565	female pregnancy	11.9	0.0279
MAFK	K562	GO:0051384	response to glucocorticoid	11.57	0.00584
MAFK	K562	GO:0031960	response to corticosteroid	11.57	0.00539
MAFK	K562	GO:0051591	response to cAMP	9.11	0.00215
MAFK	K562	GO:0046683	response to organophosphorus	9.11	0.00161
MAFK	K562	GO:0014074	response to purine-containing compound	8.58	0.00178
MAFK	K562	GO:0009612	response to mechanical stimulus	8.1	0.00242
MAFK	K562	GO:0071248	cellular response to metal ion	8.01	0.0317
MAFK	K562	GO:1901654	response to ketone	8.01	0.0302
MAFK	K562	GO:0071241	cellular response to inorganic substance	7.44	0.0417
MAFK	K562	GO:0010038	response to metal ion	6.13	0.104
MAFK	K562	GO:0042493	response to drug	6.05	0.00142
MAFK	K562	GO:0034097	response to cytokine	5.83	0.0141
MAFK	K562	GO:0032496	response to lipopolysaccharide	5.79	0.13
MAFK	K562	GO:0032870	cellular response to hormone stimulus	4.9	0.0144
MAFK	K562	GO:0010035	response to inorganic substance	4.63	0.132
MAFK	K562	GO:0010243	response to organonitrogen compound	4.39	0.0272
MAFK	K562	GO:0009628	response to abiotic stimulus	4.25	0.00471
MAFK	K562	GO:1901698	response to nitrogen compound	4.17	0.0332
MAFK	K562	GO:0044267	cellular protein metabolic process	3.84	0.134
MAFK	K562	GO:0009725	response to hormone	3.83	0.0276
MAFK	K562	GO:0071495	cellular response to endogenous stimulus	3.62	0.0846
MAFK	K562	GO:0033993	response to lipid	3.35	0.0606
MAFK	K562	GO:0014070	response to organic cyclic compound	3.33	0.13
MAFK	K562	GO:0006366	transcription from RNA polymerase II promoter	2.25	0.0145
MAZ	Gm12878	GO:0060333	interferon-gamma-mediated signaling pathway	13.89	5.43e-07
MAZ	Gm12878	GO:0032647	regulation of interferon-alpha production	13.89	0.123
MAZ	Gm12878	GO:0032727	positive regulation of interferon-alpha production	13.89	0.113
MAZ	Gm12878	GO:0070345	negative regulation of fat cell proliferation	13.89	0.105
MAZ	Gm12878	GO:0070344	regulation of fat cell proliferation	13.89	0.0984
MAZ	Gm12878	GO:0060337	type I interferon signaling pathway	12.5	5.37e-07
MAZ	Gm12878	GO:0032728	positive regulation of interferon-beta production	11.11	0.0646
MAZ	Gm12878	GO:0032648	regulation of interferon-beta production	9.26	0.117
MAZ	Gm12878	GO:0019221	cytokine-mediated signaling pathway	8.99	4.14e-07
MAZ	Gm12878	GO:0051607	defense response to virus	7.94	0.143
MAZ	Gm12878	GO:0098542	defense response to other organism	6.31	0.126
MAZ	Gm12878	GO:0001819	positive regulation of cytokine production	4.81	0.0134
MAZ	Gm12878	GO:0016032	viral process	4.63	0.169
MAZ	Gm12878	GO:0044764	multi-organism cellular process	4.63	0.162
MAZ	Gm12878	GO:0044403	symbiosis, encompassing mutualism through parasitism	4.63	0.155
MAZ	Gm12878	GO:0045088	regulation of innate immune response	4.23	0.131
MAZ	Gm12878	GO:0001817	regulation of cytokine production	3.91	0.0679
MAZ	Gm12878	GO:0050776	regulation of immune response	3.68	0.0924
MAZ	Gm12878	GO:0035556	intracellular signal transduction	3.06	0.0999
MAZ	Gm12878	GO:0007166	cell surface receptor signaling pathway	3.05	0.000251
MAZ	Gm12878	GO:0051704	multi-organism process	3.02	0.124
MAZ	Gm12878	GO:0007165	signal transduction	2.21	0.000959
MAZ	Gm12878	GO:0006950	response to stress	2.17	0.127
MAZ	Hepg2	GO:0030335	positive regulation of cell migration	7.94	1
MAZ	Hepg2	GO:0040017	positive regulation of locomotion	7.94	1
MAZ	Hepg2	GO:2000147	positive regulation of cell motility	7.94	1
MAZ	K562	GO:2000352	negative regulation of endothelial cell apoptotic process	41.67	0.376
MAZ	K562	GO:0060575	intestinal epithelial cell differentiation	41.67	0.323
MAZ	K562	GO:0050817	coagulation	16.67	0.134
MAZ	K562	GO:0007596	blood coagulation	16.67	0.0672
MAZ	K562	GO:0007599	hemostasis	15.15	0.0697
MAZ	K562	GO:0001701	in utero embryonic development	8.77	0.562
MAZ	K562	GO:0043009	chordate embryonic development	8.77	0.449
MAZ	K562	GO:0050878	regulation of body fluid levels	8.33	0.347
MAZ	K562	GO:0009792	embryo development ending in birth or egg hatching	8.33	0.309
MAZ	K562	GO:0009790	embryo development	7.58	0.41
MXI1	Gm12878	GO:0032647	regulation of interferon-alpha production	14.42	0.219
MXI1	Gm12878	GO:0032727	positive regulation of interferon-alpha production	14.42	0.187
MXI1	Gm12878	GO:0032728	positive regulation of interferon-beta production	11.54	0.0966
MXI1	Gm12878	GO:0060333	interferon-gamma-mediated signaling pathway	10.82	0.00347
MXI1	Gm12878	GO:0060337	type I interferon signaling pathway	10.1	0.00154
MXI1	Gm12878	GO:0032648	regulation of interferon-beta production	9.62	0.221
MXI1	Gm12878	GO:0098542	defense response to other organism	6.56	0.208
MXI1	Gm12878	GO:0019221	cytokine-mediated signaling pathway	5.94	0.0602
MXI1	Gm12878	GO:0051707	response to other organism	4.55	0.397
MXI1	Gm12878	GO:0033554	cellular response to stress	2.74	0.286
MXI1	H1hesc	GO:0006260	DNA replication	17.65	0.0627
MXI1	H1hesc	GO:0033044	regulation of chromosome organization	7.88	0.236
MXI1	H1hesc	GO:0006259	DNA metabolic process	7.35	0.0995
MXI1	Helas3	GO:0006260	DNA replication	16.07	0.293
MXI1	Helas3	GO:0045600	positive regulation of fat cell differentiation	15.31	0.178
MXI1	Helas3	GO:0045598	regulation of fat cell differentiation	8.24	0.398
MXI1	Helas3	GO:0016032	viral process	7.44	0.319
MXI1	Helas3	GO:0044764	multi-organism cellular process	7.44	0.24
MXI1	Helas3	GO:0044403	symbiosis, encompassing mutualism through parasitism	7.44	0.192
MXI1	Helas3	GO:0044419	interspecies interaction between organisms	6.09	0.387
MXI1	Helas3	GO:1901698	response to nitrogen compound	4.69	0.405
MXI1	Hepg2	GO:0070345	negative regulation of fat cell proliferation	20.83	0.206
MXI1	Hepg2	GO:0070344	regulation of fat cell proliferation	20.83	0.137
MXI1	Hepg2	GO:0006953	acute-phase response	15.62	0.319
MXI1	Hepg2	GO:0002526	acute inflammatory response	12.5	0.553
MXI1	Hepg2	GO:0007005	mitochondrion organization	10.42	0.136
MXI1	Hepg2	GO:0000278	mitotic cell cycle	10.42	0.257
MXI1	Hepg2	GO:0006952	defense response	3.62	0.352
MXI1	K562	GO:0051385	response to mineralocorticoid	11.72	0.00491
MXI1	K562	GO:0051412	response to corticosterone	11.72	0.00368
MXI1	K562	GO:0051384	response to glucocorticoid	7.81	0.00748
MXI1	K562	GO:0031960	response to corticosteroid	7.81	0.0068
MXI1	K562	GO:0032570	response to progesterone	7.32	0.0402
MXI1	K562	GO:0071277	cellular response to calcium ion	7.32	0.0379
MXI1	K562	GO:0051592	response to calcium ion	7.32	0.0359
MXI1	K562	GO:0009612	response to mechanical stimulus	5.86	0.00482
MXI1	K562	GO:0051591	response to cAMP	5.86	0.00584
MXI1	K562	GO:0046683	response to organophosphorus	5.86	0.00511
MXI1	K562	GO:0071241	cellular response to inorganic substance	5.86	0.0121
MXI1	K562	GO:0014074	response to purine-containing compound	5.51	0.00807
MXI1	K562	GO:0071248	cellular response to metal ion	5.41	0.0541
MXI1	K562	GO:0042493	response to drug	4.16	0.00593
MXI1	K562	GO:0010035	response to inorganic substance	3.91	0.034
MXI1	K562	GO:0032870	cellular response to hormone stimulus	3.79	0.00844
MXI1	K562	GO:0048545	response to steroid hormone	3.64	0.0515
MXI1	K562	GO:0009725	response to hormone	3.35	0.00504
MXI1	K562	GO:0009628	response to abiotic stimulus	3.11	0.0125
MXI1	K562	GO:0010243	response to organonitrogen compound	3.08	0.0822
MXI1	K562	GO:0071495	cellular response to endogenous stimulus	3.06	0.0302
MXI1	K562	GO:1901698	response to nitrogen compound	2.93	0.121
MXI1	K562	GO:0014070	response to organic cyclic compound	2.81	0.0536
MXI1	K562	GO:0009605	response to external stimulus	2.51	0.136
MXI1	K562	GO:0033993	response to lipid	2.51	0.131
MXI1	K562	GO:0009719	response to endogenous stimulus	2.45	0.061
MXI1	K562	GO:0071310	cellular response to organic substance	2.31	0.111
MXI1	K562	GO:0006366	transcription from RNA polymerase II promoter	2.19	0.000519
MYC	A549	GO:0007259	JAK-STAT cascade	17.86	6.43e-05
MYC	A549	GO:0060397	JAK-STAT cascade involved in growth hormone signaling pathway	17.86	0.0162
MYC	A549	GO:0002705	positive regulation of leukocyte mediated immunity	17.86	0.112
MYC	A549	GO:0002708	positive regulation of lymphocyte mediated immunity	17.86	0.0958
MYC	A549	GO:0002699	positive regulation of immune effector process	11.9	0.113
MYC	A549	GO:0040014	regulation of multicellular organism growth	8.93	0.245
MYC	A549	GO:0002697	regulation of immune effector process	8.12	0.11
MYC	A549	GO:0019221	cytokine-mediated signaling pathway	7.35	0.012
MYC	Gm12878	GO:0070345	negative regulation of fat cell proliferation	37.5	0.0605
MYC	Gm12878	GO:0070344	regulation of fat cell proliferation	37.5	0.0303
MYC	Gm12878	GO:1900739	regulation of protein insertion into mitochondrial membrane involved in apoptotic signaling pathway	37.5	0.47
MYC	Gm12878	GO:1900740	positive regulation of protein insertion into mitochondrial membrane involved in apoptotic signaling pathway	37.5	0.403
MYC	Gm12878	GO:1901028	regulation of mitochondrial outer membrane permeabilization involved in apoptotic signaling pathway	37.5	0.353
MYC	Gm12878	GO:1901030	positive regulation of mitochondrial outer membrane permeabilization involved in apoptotic signaling pathway	37.5	0.314
MYC	Gm12878	GO:0000278	mitotic cell cycle	18.75	0.0252
MYC	Gm12878	GO:0007049	cell cycle	13.64	0.0857
MYC	Gm12878	GO:0007219	Notch signaling pathway	11.54	0.145
MYC	H1hesc	GO:0060174	limb bud formation	18.75	0.575
MYC	H1hesc	GO:0042246	tissue regeneration	14.06	0.74
MYC	H1hesc	GO:0021781	glial cell fate commitment	14.06	0.555
MYC	H1hesc	GO:0021510	spinal cord development	14.06	0.444
MYC	H1hesc	GO:0045165	cell fate commitment	4.29	0.32
MYC	Hepg2	GO:0048732	gland development	3.4	1
MYC	Huvec	GO:0000075	cell cycle checkpoint	37.5	1
MYC	Huvec	GO:0000077	DNA damage checkpoint	37.5	1
MYC	Huvec	GO:0031570	DNA integrity checkpoint	37.5	0.931
MYC	Huvec	GO:0006974	cellular response to DNA damage stimulus	11.72	0.782
MYC	Huvec	GO:0035556	intracellular signal transduction	7.5	1
MYC	K562	GO:0060575	intestinal epithelial cell differentiation	41.67	0.753
MYC	K562	GO:0034698	response to gonadotropin	17.86	1
MYC	K562	GO:0071371	cellular response to gonadotropin stimulus	17.86	0.706
MYC	K562	GO:0007267	cell-cell signaling	7.94	0.848
MYC	K562	GO:0044700	single organism signaling	7.58	0.82
MYC	K562	GO:0023052	signaling	7.58	0.683
MYC	Mcf7	GO:0000429	carbon catabolite regulation of transcription from RNA polymerase II promoter	31.25	1
MYC	Mcf7	GO:0000430	regulation of transcription from RNA polymerase II promoter by glucose	31.25	1
MYC	Mcf7	GO:0000432	positive regulation of transcription from RNA polymerase II promoter by glucose	31.25	1
MYC	Mcf7	GO:0000436	carbon catabolite activation of transcription from RNA polymerase II promoter	31.25	1
MYC	Mcf7	GO:0036342	post-anal tail morphogenesis	31.25	0.828
MYC	Mcf7	GO:0019086	late viral transcription	31.25	0.69
MYC	Mcf7	GO:0019083	viral transcription	31.25	0.591
NRF1	H1hesc	GO:0000278	mitotic cell cycle	8.15	0.569
NRF1	H1hesc	GO:0010927	cellular component assembly involved in morphogenesis	8.15	0.474
NRF1	H1hesc	GO:0030030	cell projection organization	5.75	0.948
NRF1	H1hesc	GO:0022607	cellular component assembly	4.76	0.489
NRF1	H1hesc	GO:0071840	cellular component organization or biogenesis	2.31	0.494
NRF1	H1hesc	GO:0016043	cellular component organization	2.31	0.371
NRF1	Helas3	GO:1901566	organonitrogen compound biosynthetic process	46.88	1
NRF1	Hepg2	GO:0070345	negative regulation of fat cell proliferation	31.25	0.0555
NRF1	Hepg2	GO:0070344	regulation of fat cell proliferation	31.25	0.037
NRF1	Hepg2	GO:1900739	regulation of protein insertion into mitochondrial membrane involved in apoptotic signaling pathway	31.25	0.69
NRF1	Hepg2	GO:1900740	positive regulation of protein insertion into mitochondrial membrane involved in apoptotic signaling pathway	31.25	0.591
NRF1	Hepg2	GO:1901028	regulation of mitochondrial outer membrane permeabilization involved in apoptotic signaling pathway	31.25	0.517
NRF1	Hepg2	GO:1901030	positive regulation of mitochondrial outer membrane permeabilization involved in apoptotic signaling pathway	31.25	0.46
NRF1	Hepg2	GO:0006260	DNA replication	25	0.0132
NRF1	Hepg2	GO:0000278	mitotic cell cycle	15.62	0.0438
NRF1	Hepg2	GO:0007049	cell cycle	11.36	0.157
NRF1	K562	GO:0051385	response to mineralocorticoid	34.09	6.75e-06
NRF1	K562	GO:0051412	response to corticosterone	34.09	5.63e-06
NRF1	K562	GO:0045672	positive regulation of osteoclast differentiation	34.09	0.075
NRF1	K562	GO:0009629	response to gravity	34.09	0.0734
NRF1	K562	GO:0060430	lung saccule development	34.09	0.0719
NRF1	K562	GO:0032570	response to progesterone	21.31	0.000121
NRF1	K562	GO:0071277	cellular response to calcium ion	21.31	0.000113
NRF1	K562	GO:0051592	response to calcium ion	21.31	0.000107
NRF1	K562	GO:0002763	positive regulation of myeloid leukocyte differentiation	20.45	0.0218
NRF1	K562	GO:0007565	female pregnancy	19.48	0.00222
NRF1	K562	GO:0051384	response to glucocorticoid	18.94	0.000224
NRF1	K562	GO:0031960	response to corticosteroid	18.94	0.000212
NRF1	K562	GO:0051591	response to cAMP	17.05	9.79e-07
NRF1	K562	GO:0046683	response to organophosphorus	17.05	4.89e-07
NRF1	K562	GO:0031098	stress-activated protein kinase signaling cascade	17.05	0.0396
NRF1	K562	GO:0007612	learning	17.05	0.0387
NRF1	K562	GO:0051403	stress-activated MAPK cascade	17.05	0.0377
NRF1	K562	GO:0014074	response to purine-containing compound	16.04	6.12e-07
NRF1	K562	GO:0071248	cellular response to metal ion	15.73	7.87e-05
NRF1	K562	GO:0071241	cellular response to inorganic substance	14.61	0.000107
NRF1	K562	GO:0007611	learning or memory	13.64	0.0104
NRF1	K562	GO:0009612	response to mechanical stimulus	13.26	2.36e-05
NRF1	K562	GO:1901654	response to ketone	13.11	0.00156
NRF1	K562	GO:0045639	positive regulation of myeloid cell differentiation	12.78	0.0859
NRF1	K562	GO:0023014	signal transduction by protein phosphorylation	12.78	0.0842
NRF1	K562	GO:0000165	MAPK cascade	12.78	0.0826
NRF1	K562	GO:0044706	multi-multicellular organism process	12.4	0.0156
NRF1	K562	GO:0050890	cognition	12.4	0.0152
NRF1	K562	GO:0010038	response to metal ion	12.03	0.000283
NRF1	K562	GO:0044703	multi-organism reproductive process	11.36	0.0218
NRF1	K562	GO:0042493	response to drug	9.9	2.97e-06
NRF1	K562	GO:0097305	response to alcohol	8.97	0.0101
NRF1	K562	GO:0010035	response to inorganic substance	8.84	0.000271
NRF1	K562	GO:0010243	response to organonitrogen compound	8.07	1.32e-05
NRF1	K562	GO:0007623	circadian rhythm	8.02	0.0712
NRF1	K562	GO:1901698	response to nitrogen compound	7.67	1.92e-05
NRF1	K562	GO:0048545	response to steroid hormone	7.05	0.00681
NRF1	K562	GO:0032870	cellular response to hormone stimulus	7.02	0.00133
NRF1	K562	GO:0034097	response to cytokine	6.82	0.0349
NRF1	K562	GO:0009725	response to hormone	6.26	9.18e-05
NRF1	K562	GO:0014070	response to organic cyclic compound	6.14	0.000103
NRF1	K562	GO:0009628	response to abiotic stimulus	5.57	0.00121
NRF1	K562	GO:0071495	cellular response to endogenous stimulus	5.19	0.00868
NRF1	K562	GO:0009719	response to endogenous stimulus	5.09	7.67e-05
NRF1	K562	GO:0033993	response to lipid	4.87	0.00282
NRF1	K562	GO:0051704	multi-organism process	4.45	0.07
NRF1	K562	GO:1901700	response to oxygen-containing compound	4.32	0.00147
NRF1	K562	GO:0009605	response to external stimulus	4.26	0.0276
NRF1	K562	GO:0010033	response to organic substance	3.34	0.00228
NRF1	K562	GO:0070887	cellular response to chemical stimulus	3.29	0.0396
NRF1	K562	GO:0042221	response to chemical	2.96	0.00661
NRF1	K562	GO:0051716	cellular response to stimulus	2.81	0.0372
REST	A549	GO:0051385	response to mineralocorticoid	17.05	0.000962
REST	A549	GO:0051412	response to corticosterone	17.05	0.000642
REST	A549	GO:0051384	response to glucocorticoid	11.36	0.00111
REST	A549	GO:0031960	response to corticosteroid	11.36	0.000947
REST	A549	GO:0031098	stress-activated protein kinase signaling cascade	11.36	0.0196
REST	A549	GO:0007612	learning	11.36	0.019
REST	A549	GO:0051403	stress-activated MAPK cascade	11.36	0.0183
REST	A549	GO:0032570	response to progesterone	10.65	0.00505
REST	A549	GO:0071277	cellular response to calcium ion	10.65	0.00479
REST	A549	GO:0051592	response to calcium ion	10.65	0.00457
REST	A549	GO:0071241	cellular response to inorganic substance	9.74	0.000381
REST	A549	GO:0007565	female pregnancy	9.74	0.0363
REST	A549	GO:0071248	cellular response to metal ion	9.18	0.00106
REST	A549	GO:0007611	learning or memory	8.52	0.0153
REST	A549	GO:0023014	signal transduction by protein phosphorylation	8.52	0.0608
REST	A549	GO:0000165	MAPK cascade	8.52	0.0593
REST	A549	GO:0050890	cognition	7.75	0.022
REST	A549	GO:0034166	toll-like receptor 10 signaling pathway	7.58	0.0854
REST	A549	GO:0002755	MyD88-dependent toll-like receptor signaling pathway	7.58	0.0837
REST	A549	GO:0034134	toll-like receptor 2 signaling pathway	7.58	0.082
REST	A549	GO:0034146	toll-like receptor 5 signaling pathway	7.58	0.0804
REST	A549	GO:0038124	toll-like receptor TLR6:TLR2 signaling pathway	7.58	0.0789
REST	A549	GO:0038123	toll-like receptor TLR1:TLR2 signaling pathway	7.58	0.0774
REST	A549	GO:0051591	response to cAMP	7.46	0.00316
REST	A549	GO:0046683	response to organophosphorus	7.46	0.00287
REST	A549	GO:0010038	response to metal ion	7.02	0.00431
REST	A549	GO:0014074	response to purine-containing compound	7.02	0.00398
REST	A549	GO:0009612	response to mechanical stimulus	6.63	0.00453
REST	A549	GO:0045598	regulation of fat cell differentiation	6.56	0.0503
REST	A549	GO:1901654	response to ketone	6.56	0.0489
REST	A549	GO:0010035	response to inorganic substance	5.68	0.00171
REST	A549	GO:0097305	response to alcohol	5.38	0.0417
REST	A549	GO:0010243	response to organonitrogen compound	4.93	0.000958
REST	A549	GO:1901698	response to nitrogen compound	4.69	0.000866
REST	A549	GO:0042493	response to drug	4.4	0.0203
REST	A549	GO:0048545	response to steroid hormone	4.11	0.0616
REST	A549	GO:0009725	response to hormone	3.83	0.00474
REST	A549	GO:0009628	response to abiotic stimulus	3.83	0.00443
REST	A549	GO:0014070	response to organic cyclic compound	3.41	0.0197
REST	A549	GO:0009605	response to external stimulus	3.35	0.0119
REST	A549	GO:0033993	response to lipid	3.35	0.0114
REST	A549	GO:0006952	defense response	3.33	0.0495
REST	A549	GO:0051726	regulation of cell cycle	3.13	0.0686
REST	A549	GO:1901700	response to oxygen-containing compound	3.12	0.0046
REST	A549	GO:0009719	response to endogenous stimulus	3.05	0.0111
REST	A549	GO:0003006	developmental process involved in reproduction	2.94	0.0578
REST	A549	GO:0022414	reproductive process	2.91	0.00418
REST	A549	GO:0071310	cellular response to organic substance	2.64	0.0646
REST	A549	GO:0010033	response to organic substance	2.51	0.00832
REST	A549	GO:0070887	cellular response to chemical stimulus	2.46	0.0626
REST	A549	GO:0042221	response to chemical	2.22	0.0279
REST	A549	GO:0051716	cellular response to stimulus	2.19	0.0572
REST	A549	GO:0050896	response to stimulus	1.8	0.0776
REST	K562	GO:0060575	intestinal epithelial cell differentiation	93.75	0.0753
REST	K562	GO:0014888	striated muscle adaptation	62.5	0.125
REST	K562	GO:0014887	cardiac muscle adaptation	62.5	0.112
REST	K562	GO:0014897	striated muscle hypertrophy	62.5	0.102
REST	K562	GO:0014896	muscle hypertrophy	62.5	0.0937
REST	K562	GO:0014898	cardiac muscle hypertrophy in response to stress	62.5	0.0865
REST	K562	GO:0043500	muscle adaptation	62.5	0.0803
REST	K562	GO:0003299	muscle hypertrophy in response to stress	62.5	0.075
REST	K562	GO:0003300	cardiac muscle hypertrophy	62.5	0.0703
REST	K562	GO:0051890	regulation of cardioblast differentiation	46.88	0.102
REST	K562	GO:0051891	positive regulation of cardioblast differentiation	46.88	0.0975
REST	K562	GO:0045766	positive regulation of angiogenesis	46.88	0.0934
REST	K562	GO:0003281	ventricular septum development	46.88	0.0897
REST	K562	GO:0003012	muscle system process	46.88	0.0862
REST	K562	GO:0071773	cellular response to BMP stimulus	37.5	0.133
REST	K562	GO:0071772	response to BMP	37.5	0.128
REST	K562	GO:1904018	positive regulation of vasculature development	37.5	0.124
REST	K562	GO:0055023	positive regulation of cardiac muscle tissue growth	37.5	0.12
REST	K562	GO:0055025	positive regulation of cardiac muscle tissue development	37.5	0.116
REST	K562	GO:0003215	cardiac right ventricle morphogenesis	37.5	0.113
REST	K562	GO:0003279	cardiac septum development	37.5	0.109
REST	K562	GO:0060045	positive regulation of cardiac muscle cell proliferation	37.5	0.106
REST	K562	GO:0050817	coagulation	28.12	0.119
REST	K562	GO:0007596	blood coagulation	28.12	0.0796
REST	K562	GO:0007599	hemostasis	25.57	0.0819
REST	K562	GO:0043627	response to estrogen	21.63	0.0942
REST	K562	GO:0008584	male gonad development	18.75	0.128
REST	K562	GO:0008406	gonad development	18.75	0.112
REST	K562	GO:0001701	in utero embryonic development	14.8	0.105
REST	K562	GO:0043009	chordate embryonic development	14.8	0.0996
REST	K562	GO:0050878	regulation of body fluid levels	14.06	0.111
REST	K562	GO:0009792	embryo development ending in birth or egg hatching	14.06	0.106
REST	K562	GO:0009790	embryo development	12.78	0.111
REST	K562	GO:0042493	response to drug	12.1	0.171
REST	K562	GO:0022603	regulation of anatomical structure morphogenesis	7.5	0.0735
REST	K562	GO:0048646	anatomical structure formation involved in morphogenesis	5.6	0.115
REST	Panc1	GO:1901741	positive regulation of myoblast fusion	46.88	0.293
REST	Panc1	GO:1901739	regulation of myoblast fusion	46.88	0.251
REST	Panc1	GO:0051149	positive regulation of muscle cell differentiation	17.58	0.501
REST	Panc1	GO:0030183	B cell differentiation	15.62	0.248
REST	Panc1	GO:0042113	B cell activation	14.06	0.287
REST	Panc1	GO:0045666	positive regulation of neuron differentiation	8.93	0.245
REST	Panc1	GO:0010720	positive regulation of cell development	8.04	0.0469
REST	Panc1	GO:0060284	regulation of cell development	4.46	0.34
REST	Panc1	GO:0045597	positive regulation of cell differentiation	4.43	0.136
REST	Panc1	GO:0051094	positive regulation of developmental process	3.45	0.393
REST	Panc1	GO:0051240	positive regulation of multicellular organismal process	3.19	0.275
REST	Pfsk1	GO:0042445	hormone metabolic process	62.5	1
REST	Pfsk1	GO:0010817	regulation of hormone levels	35.71	1
REST	Pfsk1	GO:0007154	cell communication	11.36	1
REST	U87	GO:0045672	positive regulation of osteoclast differentiation	53.57	0.0732
REST	U87	GO:0055072	iron ion homeostasis	35.71	0.0816
REST	U87	GO:0002763	positive regulation of myeloid leukocyte differentiation	32.14	0.0579
REST	U87	GO:0023014	signal transduction by protein phosphorylation	26.79	0.0129
REST	U87	GO:0000165	MAPK cascade	26.79	0.00647
REST	U87	GO:0031098	stress-activated protein kinase signaling cascade	26.79	0.0313
REST	U87	GO:0051403	stress-activated MAPK cascade	26.79	0.0287
REST	U87	GO:0045639	positive regulation of myeloid cell differentiation	20.09	0.0593
REST	U87	GO:0034166	toll-like receptor 10 signaling pathway	17.86	0.0743
REST	U87	GO:0002755	MyD88-dependent toll-like receptor signaling pathway	17.86	0.0706
REST	U87	GO:0034134	toll-like receptor 2 signaling pathway	17.86	0.0673
REST	U87	GO:0034146	toll-like receptor 5 signaling pathway	17.86	0.0642
REST	U87	GO:0038124	toll-like receptor TLR6:TLR2 signaling pathway	17.86	0.0614
REST	U87	GO:0038123	toll-like receptor TLR1:TLR2 signaling pathway	17.86	0.0588
REST	U87	GO:0034162	toll-like receptor 9 signaling pathway	16.07	0.077
REST	U87	GO:0007611	learning or memory	16.07	0.0741
REST	U87	GO:0002761	regulation of myeloid leukocyte differentiation	15.31	0.0445
REST	U87	GO:0000302	response to reactive oxygen species	14.61	0.0941
REST	U87	GO:0002221	pattern recognition receptor signaling pathway	14.61	0.091
REST	U87	GO:0002224	toll-like receptor signaling pathway	14.61	0.088
REST	U87	GO:0002756	MyD88-independent toll-like receptor signaling pathway	14.61	0.0853
REST	U87	GO:0034142	toll-like receptor 4 signaling pathway	14.61	0.0827
REST	U87	GO:0034138	toll-like receptor 3 signaling pathway	14.61	0.0803
REST	U87	GO:0038093	Fc receptor signaling pathway	14.61	0.078
REST	U87	GO:0038095	Fc-epsilon receptor signaling pathway	14.61	0.0758
REST	U87	GO:0050890	cognition	14.61	0.0738
REST	U87	GO:0007179	transforming growth factor beta receptor signaling pathway	14.61	0.0718
REST	U87	GO:0035666	TRIF-dependent toll-like receptor signaling pathway	14.61	0.07
REST	U87	GO:0006468	protein phosphorylation	14.29	0.0344
REST	U87	GO:0016310	phosphorylation	13.39	0.0319
REST	U87	GO:0043620	regulation of DNA-templated transcription in response to stress	13.39	0.0839
REST	U87	GO:0043618	regulation of transcription from RNA polymerase II promoter in response to stress	13.39	0.082
REST	U87	GO:0051345	positive regulation of hydrolase activity	13.39	0.0802
REST	U87	GO:0006796	phosphate-containing compound metabolic process	11.28	0.0476
REST	U87	GO:0006793	phosphorus metabolic process	11.28	0.0444
REST	U87	GO:0045637	regulation of myeloid cell differentiation	9.32	0.0593
REST	U87	GO:0006464	cellular protein modification process	8.64	0.0462
REST	U87	GO:0036211	protein modification process	8.64	0.0385
REST	U87	GO:0043412	macromolecule modification	8.37	0.0341
REST	U87	GO:0010035	response to inorganic substance	7.94	0.0715
REST	U87	GO:1902105	regulation of leukocyte differentiation	7.39	0.0812
REST	U87	GO:0044267	cellular protein metabolic process	7.05	0.0508
REST	U87	GO:0033554	cellular response to stress	5.54	0.0328
REST	U87	GO:0019538	protein metabolic process	5.25	0.0707
REST	U87	GO:0080134	regulation of response to stress	5.05	0.0834
REST	U87	GO:0070887	cellular response to chemical stimulus	3.87	0.0918
REST	U87	GO:0042221	response to chemical	3.26	0.058
REST	U87	GO:0007165	signal transduction	2.72	0.0792
RFX5	Gm12878	GO:0051385	response to mineralocorticoid	11.36	0.0173
RFX5	Gm12878	GO:0051412	response to corticosterone	11.36	0.00867
RFX5	Gm12878	GO:0002762	negative regulation of myeloid leukocyte differentiation	11.36	0.183
RFX5	Gm12878	GO:0048146	positive regulation of fibroblast proliferation	7.58	0.183
RFX5	Gm12878	GO:0032570	response to progesterone	7.1	0.133
RFX5	Gm12878	GO:0071277	cellular response to calcium ion	7.1	0.114
RFX5	Gm12878	GO:0051592	response to calcium ion	7.1	0.0999
RFX5	Gm12878	GO:0051384	response to glucocorticoid	6.31	0.14
RFX5	Gm12878	GO:0031960	response to corticosteroid	6.31	0.13
RFX5	Gm12878	GO:0051591	response to cAMP	4.97	0.154
RFX5	Gm12878	GO:0046683	response to organophosphorus	4.97	0.123
RFX5	Gm12878	GO:0002761	regulation of myeloid leukocyte differentiation	4.87	0.167
RFX5	Gm12878	GO:0014074	response to purine-containing compound	4.68	0.109
RFX5	Gm12878	GO:0009612	response to mechanical stimulus	4.42	0.137
RFX5	Gm12878	GO:0007178	transmembrane receptor protein serine/threonine kinase signaling pathway	3.98	0.19
RFX5	Gm12878	GO:0045637	regulation of myeloid cell differentiation	3.95	0.129
RFX5	Gm12878	GO:0042493	response to drug	3.67	0.127
RFX5	H1hesc	GO:0051385	response to mineralocorticoid	15.62	0.00311
RFX5	H1hesc	GO:0051412	response to corticosterone	15.62	0.00155
RFX5	H1hesc	GO:0070345	negative regulation of fat cell proliferation	15.62	0.0681
RFX5	H1hesc	GO:0070344	regulation of fat cell proliferation	15.62	0.0638
RFX5	H1hesc	GO:0006260	DNA replication	12.5	0.0197
RFX5	H1hesc	GO:0051384	response to glucocorticoid	10.42	0.00168
RFX5	H1hesc	GO:0031960	response to corticosteroid	10.42	0.00147
RFX5	H1hesc	GO:0032570	response to progesterone	9.77	0.0153
RFX5	H1hesc	GO:0071277	cellular response to calcium ion	9.77	0.0139
RFX5	H1hesc	GO:0051592	response to calcium ion	9.77	0.0127
RFX5	H1hesc	GO:0007565	female pregnancy	8.93	0.0842
RFX5	H1hesc	GO:0051591	response to cAMP	7.81	0.00112
RFX5	H1hesc	GO:0046683	response to organophosphorus	7.81	0.000841
RFX5	H1hesc	GO:0000278	mitotic cell cycle	7.81	0.13
RFX5	H1hesc	GO:0014074	response to purine-containing compound	7.35	0.00122
RFX5	H1hesc	GO:1901654	response to ketone	7.21	0.0156
RFX5	H1hesc	GO:0007179	transforming growth factor beta receptor signaling pathway	7.1	0.0649
RFX5	H1hesc	GO:0007049	cell cycle	7.1	0.0613
RFX5	H1hesc	GO:0009612	response to mechanical stimulus	6.94	0.00176
RFX5	H1hesc	GO:0071248	cellular response to metal ion	6.01	0.117
RFX5	H1hesc	GO:0071241	cellular response to inorganic substance	5.58	0.15
RFX5	H1hesc	GO:0006259	DNA metabolic process	5.21	0.0883
RFX5	H1hesc	GO:0097305	response to alcohol	4.93	0.107
RFX5	H1hesc	GO:0042493	response to drug	4.54	0.0151
RFX5	H1hesc	GO:0010035	response to inorganic substance	4.05	0.119
RFX5	H1hesc	GO:0032870	cellular response to hormone stimulus	3.68	0.103
RFX5	H1hesc	GO:0014070	response to organic cyclic compound	3.12	0.0787
RFX5	H1hesc	GO:0033993	response to lipid	2.79	0.152
RFX5	Helas3	GO:0007259	JAK-STAT cascade	13.39	0.000447
RFX5	Helas3	GO:0006953	acute-phase response	13.39	0.00925
RFX5	Helas3	GO:0060397	JAK-STAT cascade involved in growth hormone signaling pathway	13.39	0.00854
RFX5	Helas3	GO:0043603	cellular amide metabolic process	13.39	0.0352
RFX5	Helas3	GO:0002705	positive regulation of leukocyte mediated immunity	13.39	0.0344
RFX5	Helas3	GO:0002708	positive regulation of lymphocyte mediated immunity	13.39	0.0337
RFX5	Helas3	GO:0070345	negative regulation of fat cell proliferation	13.39	0.033
RFX5	Helas3	GO:0070344	regulation of fat cell proliferation	13.39	0.0324
RFX5	Helas3	GO:0002699	positive regulation of immune effector process	11.16	0.00584
RFX5	Helas3	GO:0002526	acute inflammatory response	10.71	0.017
RFX5	Helas3	GO:0051385	response to mineralocorticoid	10.71	0.0165
RFX5	Helas3	GO:0051412	response to corticosterone	10.71	0.016
RFX5	Helas3	GO:0007565	female pregnancy	9.57	0.00848
RFX5	Helas3	GO:0002703	regulation of leukocyte mediated immunity	8.93	0.034
RFX5	Helas3	GO:0071277	cellular response to calcium ion	8.37	0.0127
RFX5	Helas3	GO:0051592	response to calcium ion	8.37	0.0122
RFX5	Helas3	GO:0051384	response to glucocorticoid	7.44	0.0198
RFX5	Helas3	GO:0031960	response to corticosteroid	7.44	0.0193
RFX5	Helas3	GO:0000302	response to reactive oxygen species	7.31	0.00881
RFX5	Helas3	GO:0002697	regulation of immune effector process	7.31	0.00835
RFX5	Helas3	GO:0071241	cellular response to inorganic substance	6.7	0.00797
RFX5	Helas3	GO:0044703	multi-organism reproductive process	6.7	0.012
RFX5	Helas3	GO:0019221	cytokine-mediated signaling pathway	6.3	0.00392
RFX5	Helas3	GO:0071248	cellular response to metal ion	6.18	0.0156
RFX5	Helas3	GO:0044706	multi-multicellular organism process	6.09	0.0423
RFX5	Helas3	GO:0007179	transforming growth factor beta receptor signaling pathway	6.09	0.0416
RFX5	Helas3	GO:0051591	response to cAMP	5.86	0.00958
RFX5	Helas3	GO:0046683	response to organophosphorus	5.86	0.00912
RFX5	Helas3	GO:0014074	response to purine-containing compound	5.51	0.0119
RFX5	Helas3	GO:0034097	response to cytokine	5.36	0.00233
RFX5	Helas3	GO:0009612	response to mechanical stimulus	5.21	0.0166
RFX5	Helas3	GO:0006979	response to oxidative stress	5.02	0.0406
RFX5	Helas3	GO:0016310	phosphorylation	5.02	0.0398
RFX5	Helas3	GO:0010035	response to inorganic substance	4.96	0.0041
RFX5	Helas3	GO:0010038	response to metal ion	4.73	0.0515
RFX5	Helas3	GO:0050778	positive regulation of immune response	4.46	0.0333
RFX5	Helas3	GO:0050776	regulation of immune response	4.33	0.00432
RFX5	Helas3	GO:0045088	regulation of innate immune response	4.08	0.0483
RFX5	Helas3	GO:1901698	response to nitrogen compound	3.68	0.00881
RFX5	Helas3	GO:0043207	response to external biotic stimulus	3.65	0.0253
RFX5	Helas3	GO:0032870	cellular response to hormone stimulus	3.55	0.0304
RFX5	Helas3	GO:0009607	response to biotic stimulus	3.55	0.0297
RFX5	Helas3	GO:0010243	response to organonitrogen compound	3.52	0.0155
RFX5	Helas3	GO:0006952	defense response	3.49	0.00886
RFX5	Helas3	GO:0051704	multi-organism process	3.49	0.00806
RFX5	Helas3	GO:0042493	response to drug	3.46	0.0603
RFX5	Helas3	GO:0031347	regulation of defense response	3.46	0.0593
RFX5	Helas3	GO:0035556	intracellular signal transduction	3.21	0.0105
RFX5	Helas3	GO:0014070	response to organic cyclic compound	3.21	0.01
RFX5	Helas3	GO:0009605	response to external stimulus	3.11	0.0082
RFX5	Helas3	GO:0009725	response to hormone	3.01	0.0272
RFX5	Helas3	GO:0009628	response to abiotic stimulus	3.01	0.0266
RFX5	Helas3	GO:0007166	cell surface receptor signaling pathway	2.94	0.00116
RFX5	Helas3	GO:0071495	cellular response to endogenous stimulus	2.91	0.0517
RFX5	Helas3	GO:0071310	cellular response to organic substance	2.83	0.00895
RFX5	Helas3	GO:0033993	response to lipid	2.63	0.0612
RFX5	Helas3	GO:0002682	regulation of immune system process	2.59	0.0422
RFX5	Helas3	GO:0070887	cellular response to chemical stimulus	2.58	0.00898
RFX5	Helas3	GO:1901700	response to oxygen-containing compound	2.45	0.0407
RFX5	Helas3	GO:0010033	response to organic substance	2.23	0.0162
RFX5	Helas3	GO:0051716	cellular response to stimulus	2.21	0.0111
RFX5	Helas3	GO:0042221	response to chemical	2.1	0.0171
RFX5	Helas3	GO:0006950	response to stress	2.09	0.0621
RFX5	Helas3	GO:0042127	regulation of cell proliferation	1.93	0.0596
RFX5	Helas3	GO:0007165	signal transduction	1.84	0.0424
RFX5	Helas3	GO:0050896	response to stimulus	1.75	0.0355
RFX5	Hepg2	GO:0060441	epithelial tube branching involved in lung morphogenesis	15	1
RFX5	K562	GO:0045766	positive regulation of angiogenesis	13.39	1
RFX5	K562	GO:0045765	regulation of angiogenesis	7.94	1
SRF	Gm12878	GO:0055072	iron ion homeostasis	41.67	0.56
SRF	Gm12878	GO:0071456	cellular response to hypoxia	20.83	0.817
SRF	Gm12878	GO:0036294	cellular response to decreased oxygen levels	20.83	0.409
SRF	Gm12878	GO:0071453	cellular response to oxygen levels	17.05	0.528
SRF	Gm12878	GO:0007219	Notch signaling pathway	14.42	0.679
SRF	Gm12878	GO:0001666	response to hypoxia	12.5	0.609
SRF	Gm12878	GO:0036293	response to decreased oxygen levels	12.5	0.533
SRF	Gm12878	GO:0050877	neurological system process	7.35	0.55
SRF	Hepg2	GO:0007259	JAK-STAT cascade	11.03	0.00159
SRF	Hepg2	GO:0006953	acute-phase response	11.03	0.0838
SRF	Hepg2	GO:0060397	JAK-STAT cascade involved in growth hormone signaling pathway	11.03	0.0629
SRF	Hepg2	GO:0043603	cellular amide metabolic process	11.03	0.431
SRF	Hepg2	GO:0002705	positive regulation of leukocyte mediated immunity	11.03	0.377
SRF	Hepg2	GO:0002708	positive regulation of lymphocyte mediated immunity	11.03	0.335
SRF	Hepg2	GO:1901605	alpha-amino acid metabolic process	11.03	0.302
SRF	Hepg2	GO:0002526	acute inflammatory response	8.82	0.235
SRF	Hepg2	GO:0019221	cytokine-mediated signaling pathway	5.19	0.0598
SRF	Hepg2	GO:0044281	small molecule metabolic process	4.29	0.308
SRF	Hepg2	GO:0006952	defense response	2.64	0.393
SRF	K562	GO:0070345	negative regulation of fat cell proliferation	12.5	0.256
SRF	K562	GO:0070344	regulation of fat cell proliferation	12.5	0.228
SRF	K562	GO:0051385	response to mineralocorticoid	10	0.175
SRF	K562	GO:0051412	response to corticosterone	10	0.14
SRF	K562	GO:0071277	cellular response to calcium ion	7.81	0.245
SRF	K562	GO:0051592	response to calcium ion	7.81	0.163
SRF	K562	GO:0051384	response to glucocorticoid	6.94	0.173
SRF	K562	GO:0031960	response to corticosteroid	6.94	0.149
SRF	K562	GO:0007179	transforming growth factor beta receptor signaling pathway	6.82	0.244
SRF	K562	GO:0006979	response to oxidative stress	4.69	0.288
SRF	K562	GO:0051591	response to cAMP	4.69	0.264
SRF	K562	GO:0046683	response to organophosphorus	4.69	0.244
SRF	K562	GO:0006366	transcription from RNA polymerase II promoter	1.8	0.262
TBP	Gm12878	GO:0032647	regulation of interferon-alpha production	19.74	0.0815
TBP	Gm12878	GO:0032727	positive regulation of interferon-alpha production	19.74	0.0698
TBP	Gm12878	GO:0032728	positive regulation of interferon-beta production	15.79	0.0339
TBP	Gm12878	GO:0060333	interferon-gamma-mediated signaling pathway	14.8	0.000847
TBP	Gm12878	GO:0032648	regulation of interferon-beta production	13.16	0.0591
TBP	Gm12878	GO:0060337	type I interferon signaling pathway	11.84	0.00299
TBP	Gm12878	GO:0032481	positive regulation of type I interferon production	7.89	0.453
TBP	Gm12878	GO:0019221	cytokine-mediated signaling pathway	6.97	0.0708
TBP	H1hesc	GO:0051606	detection of stimulus	17.86	1
TBP	Helas3	GO:0007259	JAK-STAT cascade	15.62	0.00016
TBP	Helas3	GO:0060397	JAK-STAT cascade involved in growth hormone signaling pathway	15.62	0.0288
TBP	Helas3	GO:0002705	positive regulation of leukocyte mediated immunity	15.62	0.17
TBP	Helas3	GO:0002708	positive regulation of lymphocyte mediated immunity	15.62	0.146
TBP	Helas3	GO:0071499	cellular response to laminar fluid shear stress	11.72	0.326
TBP	Helas3	GO:0034616	response to laminar fluid shear stress	11.72	0.301
TBP	Helas3	GO:0006953	acute-phase response	11.72	0.279
TBP	Helas3	GO:0045577	regulation of B cell differentiation	11.72	0.261
TBP	Helas3	GO:0045579	positive regulation of B cell differentiation	11.72	0.244
TBP	Helas3	GO:0002699	positive regulation of immune effector process	10.42	0.198
TBP	Helas3	GO:0042542	response to hydrogen peroxide	7.81	0.338
TBP	Helas3	GO:0034599	cellular response to oxidative stress	7.1	0.138
TBP	Helas3	GO:0002697	regulation of immune effector process	7.1	0.123
TBP	Helas3	GO:0019221	cytokine-mediated signaling pathway	6.43	0.0333
TBP	Helas3	GO:0006979	response to oxidative stress	5.86	0.166
TBP	Helas3	GO:2000026	regulation of multicellular organismal development	1.94	0.353
TBP	Hepg2	GO:0065008	regulation of biological quality	3.26	1
TBP	K562	GO:0070345	negative regulation of fat cell proliferation	14.42	1
TBP	K562	GO:0070344	regulation of fat cell proliferation	14.42	0.656
TCF12	Gm12878	GO:0060333	interferon-gamma-mediated signaling pathway	13.39	1.52e-06
TCF12	Gm12878	GO:0045075	regulation of interleukin-12 biosynthetic process	13.39	0.0111
TCF12	Gm12878	GO:0032647	regulation of interferon-alpha production	13.39	0.0636
TCF12	Gm12878	GO:0097028	dendritic cell differentiation	13.39	0.0612
TCF12	Gm12878	GO:0002753	cytoplasmic pattern recognition receptor signaling pathway	13.39	0.059
TCF12	Gm12878	GO:0045084	positive regulation of interleukin-12 biosynthetic process	13.39	0.057
TCF12	Gm12878	GO:0001773	myeloid dendritic cell activation	13.39	0.0551
TCF12	Gm12878	GO:0043123	positive regulation of I-kappaB kinase/NF-kappaB signaling	13.39	0.0533
TCF12	Gm12878	GO:0043011	myeloid dendritic cell differentiation	13.39	0.0516
TCF12	Gm12878	GO:0032727	positive regulation of interferon-alpha production	13.39	0.0501
TCF12	Gm12878	GO:0032648	regulation of interferon-beta production	11.16	0.00584
TCF12	Gm12878	GO:0060337	type I interferon signaling pathway	10.71	2.06e-05
TCF12	Gm12878	GO:0032735	positive regulation of interleukin-12 production	10.71	0.031
TCF12	Gm12878	GO:0032728	positive regulation of interferon-beta production	10.71	0.0293
TCF12	Gm12878	GO:0032655	regulation of interleukin-12 production	9.57	0.0113
TCF12	Gm12878	GO:0042108	positive regulation of cytokine biosynthetic process	9.57	0.0104
TCF12	Gm12878	GO:0051607	defense response to virus	9.57	0.00969
TCF12	Gm12878	GO:0043122	regulation of I-kappaB kinase/NF-kappaB signaling	8.93	0.0599
TCF12	Gm12878	GO:0032479	regulation of type I interferon production	8.52	0.00179
TCF12	Gm12878	GO:0098542	defense response to other organism	8.52	0.00143
TCF12	Gm12878	GO:0032481	positive regulation of type I interferon production	8.04	0.00844
TCF12	Gm12878	GO:0019221	cytokine-mediated signaling pathway	7.88	3.03e-05
TCF12	Gm12878	GO:0042035	regulation of cytokine biosynthetic process	7.21	0.00559
TCF12	Gm12878	GO:0002252	immune effector process	5.74	0.0419
TCF12	Gm12878	GO:0009615	response to virus	5.74	0.04
TCF12	Gm12878	GO:0051707	response to other organism	5.64	0.00827
TCF12	Gm12878	GO:0071345	cellular response to cytokine stimulus	5.02	0.0621
TCF12	Gm12878	GO:0001819	positive regulation of cytokine production	4.64	0.0103
TCF12	Gm12878	GO:0045088	regulation of innate immune response	4.08	0.0814
TCF12	Gm12878	GO:0001817	regulation of cytokine production	3.77	0.0377
TCF12	Gm12878	GO:0043207	response to external biotic stimulus	3.65	0.0429
TCF12	Gm12878	GO:0009607	response to biotic stimulus	3.55	0.0531
TCF12	Gm12878	GO:0006464	cellular protein modification process	3.46	0.101
TCF12	Gm12878	GO:0036211	protein modification process	3.46	0.0984
TCF12	Gm12878	GO:0019538	protein metabolic process	3.15	0.0192
TCF12	Gm12878	GO:0006952	defense response	2.91	0.0876
TCF12	Gm12878	GO:0002376	immune system process	2.64	0.0284
TCF12	Gm12878	GO:0007166	cell surface receptor signaling pathway	2.45	0.0296
TCF12	Hepg2	GO:0006869	lipid transport	7.21	0.0334
TCF12	Hepg2	GO:0015718	monocarboxylic acid transport	7.21	0.0326
TCF12	Hepg2	GO:0015711	organic anion transport	7.21	0.0319
TCF12	Hepg2	GO:0001938	positive regulation of endothelial cell proliferation	7.21	0.0312
TCF12	Hepg2	GO:0015849	organic acid transport	7.21	0.0306
TCF12	Hepg2	GO:0046942	carboxylic acid transport	7.21	0.03
TCF12	Hepg2	GO:0006873	cellular ion homeostasis	6.18	0.0101
TCF12	Hepg2	GO:0030003	cellular cation homeostasis	6.18	0.00943
TCF12	Hepg2	GO:0001936	regulation of endothelial cell proliferation	6.01	0.0268
TCF12	Hepg2	GO:0098771	inorganic ion homeostasis	5.61	0.00864
TCF12	Hepg2	GO:0055080	cation homeostasis	5.61	0.00785
TCF12	Hepg2	GO:0055065	metal ion homeostasis	5.41	0.0207
TCF12	Hepg2	GO:0050801	ion homeostasis	5.24	0.00721
TCF12	Hepg2	GO:0048145	regulation of fibroblast proliferation	5.15	0.0602
TCF12	Hepg2	GO:0006811	ion transport	5.05	0.0135
TCF12	Hepg2	GO:0050817	coagulation	5.05	0.0129
TCF12	Hepg2	GO:0007596	blood coagulation	5.05	0.0122
TCF12	Hepg2	GO:0071456	cellular response to hypoxia	4.81	0.0344
TCF12	Hepg2	GO:0036294	cellular response to decreased oxygen levels	4.81	0.0336
TCF12	Hepg2	GO:0071453	cellular response to oxygen levels	4.59	0.0218
TCF12	Hepg2	GO:0043436	oxoacid metabolic process	4.59	0.021
TCF12	Hepg2	GO:0006082	organic acid metabolic process	4.59	0.0204
TCF12	Hepg2	GO:0007599	hemostasis	4.59	0.0197
TCF12	Hepg2	GO:0019752	carboxylic acid metabolic process	4.59	0.0191
TCF12	Hepg2	GO:0050878	regulation of body fluid levels	4.33	0.000713
TCF12	Hepg2	GO:0001666	response to hypoxia	3.85	0.0275
TCF12	Hepg2	GO:0036293	response to decreased oxygen levels	3.85	0.0268
TCF12	Hepg2	GO:0070482	response to oxygen levels	3.82	0.0182
TCF12	Hepg2	GO:0043401	steroid hormone mediated signaling pathway	3.71	7.44e-05
TCF12	Hepg2	GO:0009755	hormone-mediated signaling pathway	3.51	0.000119
TCF12	Hepg2	GO:0043085	positive regulation of catalytic activity	3.39	0.0599
TCF12	Hepg2	GO:0007623	circadian rhythm	3.39	0.0588
TCF12	Hepg2	GO:0030522	intracellular receptor signaling pathway	3.23	0.000774
TCF12	Hepg2	GO:0048878	chemical homeostasis	3.16	0.00705
TCF12	Hepg2	GO:0006629	lipid metabolic process	3.09	0.06
TCF12	Hepg2	GO:0019216	regulation of lipid metabolic process	3.09	0.0589
TCF12	Hepg2	GO:0007267	cell-cell signaling	3.09	0.0579
TCF12	Hepg2	GO:0007154	cell communication	3.06	0.00733
TCF12	Hepg2	GO:0044765	single-organism transport	3.02	0.0123
TCF12	Hepg2	GO:0048511	rhythmic process	2.98	0.0203
TCF12	Hepg2	GO:0050790	regulation of catalytic activity	2.88	0.061
TCF12	Hepg2	GO:0006810	transport	2.84	0.0198
TCF12	Hepg2	GO:0051234	establishment of localization	2.76	0.0205
TCF12	Hepg2	GO:1902578	single-organism localization	2.73	0.0185
TCF12	Hepg2	GO:0050678	regulation of epithelial cell proliferation	2.64	0.0631
TCF12	Hepg2	GO:0065008	regulation of biological quality	2.53	0.000122
TCF12	Hepg2	GO:0051179	localization	2.52	0.0201
TCF12	Hepg2	GO:0006367	transcription initiation from RNA polymerase II promoter	2.5	0.00903
TCF12	Hepg2	GO:0006352	DNA-templated transcription, initiation	2.45	0.0102
TCF12	Hepg2	GO:0044710	single-organism metabolic process	2.4	0.00793
TCF12	Hepg2	GO:0042592	homeostatic process	2.4	0.0305
TCF12	Hepg2	GO:0010467	gene expression	2.36	0.0142
TCF12	Hepg2	GO:0009725	response to hormone	2.21	0.0617
TCF12	Hepg2	GO:0070887	cellular response to chemical stimulus	2.09	0.00882
TCF12	Hepg2	GO:0044702	single organism reproductive process	1.96	0.0574
TCF12	Hepg2	GO:0071310	cellular response to organic substance	1.93	0.0651
TCF12	Hepg2	GO:1901700	response to oxygen-containing compound	1.93	0.0641
TCF12	Hepg2	GO:0042221	response to chemical	1.88	0.0073
TCF12	Hepg2	GO:0022414	reproductive process	1.85	0.0626
TCF12	Hepg2	GO:0010033	response to organic substance	1.84	0.0206
TCF12	Hepg2	GO:0051716	cellular response to stimulus	1.72	0.0427
TCF12	Hepg2	GO:2000026	regulation of multicellular organismal development	1.68	0.0215
TCF12	Hepg2	GO:0048583	regulation of response to stimulus	1.64	0.0635
TCF12	Hepg2	GO:0050793	regulation of developmental process	1.55	0.0209
TCF12	Hepg2	GO:0051239	regulation of multicellular organismal process	1.5	0.0526
TCF7L2	Hct116	GO:0006260	DNA replication	27.27	0.00881
TCF7L2	Hct116	GO:0030097	hemopoiesis	10.49	0.558
TCF7L2	Hek293	GO:0021546	rhombomere development	13.24	1
TCF7L2	Hepg2	GO:0048384	retinoic acid receptor signaling pathway	13.39	0.235
TCF7L2	Hepg2	GO:0051348	negative regulation of transferase activity	13.39	0.216
TCF7L2	Hepg2	GO:0009409	response to cold	13.39	0.199
TCF7L2	Hepg2	GO:0031331	positive regulation of cellular catabolic process	8.93	0.196
TCF7L2	Hepg2	GO:0009896	positive regulation of catabolic process	7.94	0.242
TCF7L2	Hepg2	GO:0043401	steroid hormone mediated signaling pathway	6.63	2.19e-06
TCF7L2	Hepg2	GO:0009755	hormone-mediated signaling pathway	6.27	2.53e-06
TCF7L2	Hepg2	GO:0030522	intracellular receptor signaling pathway	5.64	4.64e-05
TCF7L2	Hepg2	GO:0009894	regulation of catabolic process	5.58	0.289
TCF7L2	Hepg2	GO:0006367	transcription initiation from RNA polymerase II promoter	4.12	0.00149
TCF7L2	Hepg2	GO:0006352	DNA-templated transcription, initiation	4.04	0.00157
TCF7L2	Hepg2	GO:0010467	gene expression	3.9	0.0021
TCF7L2	Hepg2	GO:0022414	reproductive process	2.61	0.168
TCF7L2	Hepg2	GO:0007165	signal transduction	2.46	0.000263
TCF7L2	Hepg2	GO:0044763	single-organism cellular process	1.43	0.204
TCF7L2	Mcf7	GO:0051348	negative regulation of transferase activity	14.06	0.37
TCF7L2	Mcf7	GO:0000278	mitotic cell cycle	9.38	0.533
TCF7L2	Mcf7	GO:0051726	regulation of cell cycle	3.44	1
TCF7L2	Mcf7	GO:0006367	transcription initiation from RNA polymerase II promoter	3.25	0.43
TCF7L2	Mcf7	GO:0006352	DNA-templated transcription, initiation	3.18	0.359
TCF7L2	Mcf7	GO:0065008	regulation of biological quality	2.79	0.727
TCF7L2	Mcf7	GO:0007165	signal transduction	2.04	0.457
TCF7L2	Panc1	GO:0006368	transcription elongation from RNA polymerase II promoter	53.57	0.0177
TCF7L2	Panc1	GO:0006354	DNA-templated transcription, elongation	40.18	0.035
TCF7L2	Panc1	GO:0034622	cellular macromolecular complex assembly	35.71	0.559
TCF7L2	Panc1	GO:0065004	protein-DNA complex assembly	35.71	0.489
TCF7L2	Panc1	GO:0016032	viral process	11.9	0.177
TCF7L2	Panc1	GO:0044764	multi-organism cellular process	11.9	0.132
TCF7L2	Panc1	GO:0044403	symbiosis, encompassing mutualism through parasitism	11.9	0.106
TCF7L2	Panc1	GO:0044419	interspecies interaction between organisms	9.74	0.206
USF1	A549	GO:0007259	JAK-STAT cascade	12.5	0.000352
USF1	A549	GO:0006953	acute-phase response	12.5	0.0106
USF1	A549	GO:0060397	JAK-STAT cascade involved in growth hormone signaling pathway	12.5	0.00991
USF1	A549	GO:0043603	cellular amide metabolic process	12.5	0.0372
USF1	A549	GO:0002705	positive regulation of leukocyte mediated immunity	12.5	0.0366
USF1	A549	GO:0002708	positive regulation of lymphocyte mediated immunity	12.5	0.0359
USF1	A549	GO:0002699	positive regulation of immune effector process	10.42	0.00655
USF1	A549	GO:0002526	acute inflammatory response	10	0.018
USF1	A549	GO:0051385	response to mineralocorticoid	10	0.0175
USF1	A549	GO:0051412	response to corticosterone	10	0.0171
USF1	A549	GO:0007565	female pregnancy	8.93	0.0115
USF1	A549	GO:0002703	regulation of leukocyte mediated immunity	8.33	0.0368
USF1	A549	GO:0071277	cellular response to calcium ion	7.81	0.0149
USF1	A549	GO:0042542	response to hydrogen peroxide	7.81	0.0144
USF1	A549	GO:0051592	response to calcium ion	7.81	0.014
USF1	A549	GO:0022602	ovulation cycle process	7.14	0.0634
USF1	A549	GO:0051384	response to glucocorticoid	6.94	0.0237
USF1	A549	GO:0031960	response to corticosteroid	6.94	0.0231
USF1	A549	GO:0000302	response to reactive oxygen species	6.82	0.0122
USF1	A549	GO:0002697	regulation of immune effector process	6.82	0.0116
USF1	A549	GO:0044703	multi-organism reproductive process	6.25	0.0144
USF1	A549	GO:0034097	response to cytokine	6	7.89e-05
USF1	A549	GO:0019221	cytokine-mediated signaling pathway	5.88	0.00706
USF1	A549	GO:0071248	cellular response to metal ion	5.77	0.0188
USF1	A549	GO:0044706	multi-multicellular organism process	5.68	0.0507
USF1	A549	GO:0009612	response to mechanical stimulus	5.56	0.00655
USF1	A549	GO:0006979	response to oxidative stress	5.47	0.0137
USF1	A549	GO:0016310	phosphorylation	5.47	0.0131
USF1	A549	GO:0051591	response to cAMP	5.47	0.0126
USF1	A549	GO:0046683	response to organophosphorus	5.47	0.0121
USF1	A549	GO:0071241	cellular response to inorganic substance	5.36	0.0256
USF1	A549	GO:0014074	response to purine-containing compound	5.15	0.014
USF1	A549	GO:0006468	protein phosphorylation	5	0.0362
USF1	A549	GO:0032496	response to lipopolysaccharide	4.86	0.0186
USF1	A549	GO:0071345	cellular response to cytokine stimulus	4.69	0.048
USF1	A549	GO:0010035	response to inorganic substance	4.63	0.00858
USF1	A549	GO:0006796	phosphate-containing compound metabolic process	4.61	0.0249
USF1	A549	GO:0006793	phosphorus metabolic process	4.61	0.0243
USF1	A549	GO:0002237	response to molecule of bacterial origin	4.61	0.0238
USF1	A549	GO:0019220	regulation of phosphate metabolic process	4.17	0.0388
USF1	A549	GO:0051174	regulation of phosphorus metabolic process	4.17	0.0382
USF1	A549	GO:0042493	response to drug	4.03	0.0112
USF1	A549	GO:0043207	response to external biotic stimulus	3.79	0.0124
USF1	A549	GO:1901698	response to nitrogen compound	3.75	0.00812
USF1	A549	GO:0009607	response to biotic stimulus	3.68	0.0127
USF1	A549	GO:0010243	response to organonitrogen compound	3.62	0.0104
USF1	A549	GO:0032870	cellular response to hormone stimulus	3.31	0.0386
USF1	A549	GO:0050776	regulation of immune response	3.31	0.038
USF1	A549	GO:0035556	intracellular signal transduction	3.25	0.00736
USF1	A549	GO:0009605	response to external stimulus	3.12	0.00734
USF1	A549	GO:0009628	response to abiotic stimulus	3.06	0.0142
USF1	A549	GO:0051726	regulation of cell cycle	3.06	0.0137
USF1	A549	GO:0071495	cellular response to endogenous stimulus	2.99	0.0242
USF1	A549	GO:0051704	multi-organism process	2.99	0.0237
USF1	A549	GO:0033993	response to lipid	2.9	0.013
USF1	A549	GO:0071310	cellular response to organic substance	2.82	0.00607
USF1	A549	GO:0009725	response to hormone	2.81	0.0382
USF1	A549	GO:0014070	response to organic cyclic compound	2.75	0.0421
USF1	A549	GO:0070887	cellular response to chemical stimulus	2.71	0.00428
USF1	A549	GO:1901700	response to oxygen-containing compound	2.64	0.0127
USF1	A549	GO:0002682	regulation of immune system process	2.62	0.0248
USF1	A549	GO:0007166	cell surface receptor signaling pathway	2.59	0.00643
USF1	A549	GO:0009719	response to endogenous stimulus	2.43	0.0423
USF1	A549	GO:0010941	regulation of cell death	2.33	0.0174
USF1	A549	GO:0022414	reproductive process	2.29	0.0297
USF1	A549	GO:0042981	regulation of apoptotic process	2.22	0.0608
USF1	A549	GO:0010033	response to organic substance	2.21	0.013
USF1	A549	GO:0051716	cellular response to stimulus	2.18	0.0121
USF1	A549	GO:0042221	response to chemical	2.07	0.0141
USF1	H1hesc	GO:0043401	steroid hormone mediated signaling pathway	5.36	1
USF1	Hepg2	GO:0010831	positive regulation of myotube differentiation	11.72	0.559
USF1	Hepg2	GO:0048384	retinoic acid receptor signaling pathway	11.72	0.489
USF1	Hepg2	GO:0060509	Type I pneumocyte differentiation	11.72	0.435
USF1	Hepg2	GO:0060479	lung cell differentiation	7.81	0.314
USF1	Hepg2	GO:0060487	lung epithelial cell differentiation	7.81	0.21
USF1	Hepg2	GO:0051149	positive regulation of muscle cell differentiation	7.81	0.564
USF1	Hepg2	GO:0043401	steroid hormone mediated signaling pathway	4.02	0.406
USF1	Hepg2	GO:0009755	hormone-mediated signaling pathway	3.8	0.165
USF1	Hepg2	GO:0010720	positive regulation of cell development	3.57	0.566
USF1	K562	GO:0060430	lung saccule development	62.5	0.941
YY1	Gm12878	GO:0060743	epithelial cell maturation involved in prostate gland development	41.67	1
YY1	Hct116	GO:0051385	response to mineralocorticoid	20.83	6.96e-05
YY1	Hct116	GO:0051412	response to corticosterone	20.83	6.26e-05
YY1	Hct116	GO:0032570	response to progesterone	15.62	7.28e-05
YY1	Hct116	GO:0071277	cellular response to calcium ion	13.02	0.00169
YY1	Hct116	GO:0051592	response to calcium ion	13.02	0.0016
YY1	Hct116	GO:0007565	female pregnancy	11.9	0.0161
YY1	Hct116	GO:0051591	response to cAMP	11.72	2.85e-06
YY1	Hct116	GO:0046683	response to organophosphorus	11.72	1.9e-06
YY1	Hct116	GO:0051384	response to glucocorticoid	11.57	0.00334
YY1	Hct116	GO:0031960	response to corticosteroid	11.57	0.00318
YY1	Hct116	GO:0014074	response to purine-containing compound	11.03	2.96e-06
YY1	Hct116	GO:1901654	response to ketone	9.62	0.00172
YY1	Hct116	GO:0009612	response to mechanical stimulus	9.26	6.64e-05
YY1	Hct116	GO:0044703	multi-organism reproductive process	8.68	0.0139
YY1	Hct116	GO:0031668	cellular response to extracellular stimulus	8.68	0.0134
YY1	Hct116	GO:0042493	response to drug	8.06	6.32e-07
YY1	Hct116	GO:0071248	cellular response to metal ion	8.01	0.0176
YY1	Hct116	GO:0043434	response to peptide hormone	7.81	0.00576
YY1	Hct116	GO:0071241	cellular response to inorganic substance	7.44	0.0252
YY1	Hct116	GO:1901652	response to peptide	6.94	0.0107
YY1	Hct116	GO:0034097	response to cytokine	6.67	0.00101
YY1	Hct116	GO:0097305	response to alcohol	6.58	0.0133
YY1	Hct116	GO:0006979	response to oxidative stress	6.51	0.0458
YY1	Hct116	GO:0032870	cellular response to hormone stimulus	6.13	9.53e-05
YY1	Hct116	GO:0071496	cellular response to external stimulus	6.13	0.0601
YY1	Hct116	GO:0010038	response to metal ion	6.13	0.0588
YY1	Hct116	GO:0010243	response to organonitrogen compound	6.03	4.6e-05
YY1	Hct116	GO:0009991	response to extracellular stimulus	5.95	0.021
YY1	Hct116	GO:0032496	response to lipopolysaccharide	5.79	0.0773
YY1	Hct116	GO:1901698	response to nitrogen compound	5.73	6.08e-05
YY1	Hct116	GO:0010035	response to inorganic substance	5.4	0.0132
YY1	Hct116	GO:0009725	response to hormone	5.1	5.12e-05
YY1	Hct116	GO:0048545	response to steroid hormone	5.03	0.0176
YY1	Hct116	GO:0014070	response to organic cyclic compound	4.58	0.000436
YY1	Hct116	GO:0071495	cellular response to endogenous stimulus	4.53	0.00171
YY1	Hct116	GO:0043207	response to external biotic stimulus	4.42	0.0377
YY1	Hct116	GO:0009607	response to biotic stimulus	4.29	0.044
YY1	Hct116	GO:0009628	response to abiotic stimulus	3.83	0.0147
YY1	Hct116	GO:0009719	response to endogenous stimulus	3.73	0.00104
YY1	Hct116	GO:0009605	response to external stimulus	3.72	0.00799
YY1	Hct116	GO:0033993	response to lipid	3.72	0.00767
YY1	Hct116	GO:0051704	multi-organism process	3.62	0.0481
YY1	Hct116	GO:1901700	response to oxygen-containing compound	3.52	0.00171
YY1	Hct116	GO:0071310	cellular response to organic substance	3.23	0.00978
YY1	Hct116	GO:0070887	cellular response to chemical stimulus	2.76	0.0319
YY1	Hct116	GO:0051716	cellular response to stimulus	2.48	0.0167
YY1	Hct116	GO:0010033	response to organic substance	2.45	0.0417
YY1	Hepg2	GO:0006260	DNA replication	30	0.00562
YY1	Hepg2	GO:0006259	DNA metabolic process	10.42	0.068
YY1	K562	GO:0006094	gluconeogenesis	62.5	0.941
YY1	K562	GO:0061394	regulation of transcription from RNA polymerase II promoter in response to arsenic-containing substance	62.5	0.47
YY1	K562	GO:0016051	carbohydrate biosynthetic process	62.5	0.314
YY1	K562	GO:0019319	hexose biosynthetic process	62.5	0.235
YY1	K562	GO:0046364	monosaccharide biosynthetic process	62.5	0.188
YY1	K562	GO:0044710	single-organism metabolic process	5.21	0.35
YY1	Nt2d1	GO:0007259	JAK-STAT cascade	20.83	2.2e-05
YY1	Nt2d1	GO:0060397	JAK-STAT cascade involved in growth hormone signaling pathway	20.83	0.00553
YY1	Nt2d1	GO:0002705	positive regulation of leukocyte mediated immunity	20.83	0.0823
YY1	Nt2d1	GO:0002708	positive regulation of lymphocyte mediated immunity	20.83	0.0686
YY1	Nt2d1	GO:0006953	acute-phase response	15.62	0.177
YY1	Nt2d1	GO:0002526	acute inflammatory response	12.5	0.228
YY1	Nt2d1	GO:0002706	regulation of lymphocyte mediated immunity	12.5	0.215
YY1	Nt2d1	GO:0042129	regulation of T cell proliferation	12.5	0.204
YY1	Nt2d1	GO:0040014	regulation of multicellular organism growth	10.42	0.147
YY1	Nt2d1	GO:0019221	cytokine-mediated signaling pathway	8.58	0.00533
YY1	Nt2d1	GO:0016310	phosphorylation	6.51	0.179
YY1	Nt2d1	GO:0007346	regulation of mitotic cell cycle	6.13	0.208
YY1	Nt2d1	GO:0016032	viral process	5.79	0.26
YY1	Nt2d1	GO:0044764	multi-organism cellular process	5.79	0.242
YY1	Nt2d1	GO:0044403	symbiosis, encompassing mutualism through parasitism	5.79	0.227
YY1	Nt2d1	GO:0044419	interspecies interaction between organisms	5.68	0.13
YY1	Nt2d1	GO:0050776	regulation of immune response	4.29	0.185
YY1	Nt2d1	GO:0051704	multi-organism process	4.08	0.0677
YY1	Nt2d1	GO:0006952	defense response	3.62	0.176
YY1	Nt2d1	GO:0035556	intracellular signal transduction	3.33	0.195
ZNF143	Gm12878	GO:0070345	negative regulation of fat cell proliferation	12.93	0.922
ZNF143	Gm12878	GO:0070344	regulation of fat cell proliferation	12.93	0.614
ZNF143	Gm12878	GO:0032269	negative regulation of cellular protein metabolic process	5.03	0.616
ZNF143	Gm12878	GO:0051248	negative regulation of protein metabolic process	4.31	0.477
ZNF143	Helas3	GO:0051385	response to mineralocorticoid	13.89	0.0059
ZNF143	Helas3	GO:0051412	response to corticosterone	13.89	0.00295
ZNF143	Helas3	GO:0070345	negative regulation of fat cell proliferation	13.89	0.105
ZNF143	Helas3	GO:0070344	regulation of fat cell proliferation	13.89	0.0984
ZNF143	Helas3	GO:0051384	response to glucocorticoid	9.26	0.00845
ZNF143	Helas3	GO:0031960	response to corticosteroid	9.26	0.00634
ZNF143	Helas3	GO:0032570	response to progesterone	8.68	0.0355
ZNF143	Helas3	GO:0071277	cellular response to calcium ion	8.68	0.0315
ZNF143	Helas3	GO:0051592	response to calcium ion	8.68	0.0284
ZNF143	Helas3	GO:0007565	female pregnancy	7.94	0.151
ZNF143	Helas3	GO:0071248	cellular response to metal ion	6.41	0.0353
ZNF143	Helas3	GO:0007179	transforming growth factor beta receptor signaling pathway	6.31	0.126
ZNF143	Helas3	GO:0051591	response to cAMP	6.08	0.0294
ZNF143	Helas3	GO:0046683	response to organophosphorus	6.08	0.0245
ZNF143	Helas3	GO:0071241	cellular response to inorganic substance	5.95	0.0542
ZNF143	Helas3	GO:0014074	response to purine-containing compound	5.72	0.034
ZNF143	Helas3	GO:0009612	response to mechanical stimulus	5.4	0.0337
ZNF143	Helas3	GO:0010038	response to metal ion	4.9	0.139
ZNF143	Helas3	GO:0010243	response to organonitrogen compound	3.29	0.14
ZNF143	Helas3	GO:1901698	response to nitrogen compound	3.12	0.181
ZNF143	K562	GO:0098602	single organism cell adhesion	5.77	1
ZNF143	K562	GO:0098609	cell-cell adhesion	5.77	0.863
ZNF143	K562	GO:0016337	single organismal cell-cell adhesion	5.77	0.691
ZNF143	K562	GO:0035556	intracellular signal transduction	4.04	1
ZNF143	K562	GO:0065008	regulation of biological quality	3.51	0.472
